# Supplementary material for: Proactive functional classification of all possible missense single-nucleotide variants in KCNQ4
Source: HighWire-hosted journal article supplement (doi:10.1101/gr.276562.122), 2022-06-27
Supplement: Supplemental_Dataset.xlsx [file Supplemental_Dataset.xlsx]

## Sheet: Supplemental_Dataset_A
Supplemental_Dataset_A: Normalized currents of 4,085 KCNQ4 missense SNVs in the homozygous state
	Single expression
Variant	Normalized current (Imut/Iwt, at +40 mV)	SEM	Number of cells
p.Met1Ile	0.284536	0.131005	10
p.Met1Lys	0.0711006	0.0226144	6
p.Met1Leu	0.459903	0.101142	7
p.Met1Arg	0.0959199	0.0502704	7
p.Met1Thr	0.678475	0.271986	7
p.Met1Val	0.350231	0.115192	9
p.Ala2Asp	0.780737	0.27596	6
p.Ala2Gly	0.841289	0.479475	3
p.Ala2Pro	0.967476	0.54641	6
p.Ala2Ser	0.678376	0.128608	4
p.Ala2Thr	0.708685	0.144244	4
p.Ala2Val	0.972774	0.221484	6
p.Glu3Ala	1.00757	0.49584	4
p.Glu3Asp	0.859324	0.440413	5
p.Glu3Gly	0.824448	0.205011	4
p.Glu3Lys	1.01158	0.214828	4
p.Glu3Gln	0.740024	0.178695	4
p.Glu3Val	0.887516	0.114022	4
p.Ala4Asp	0.921062	0.11042	3
p.Ala4Gly	0.756021	0.0397057	3
p.Ala4Pro	1.18068	0.292592	6
p.Ala4Ser	1.34612	0.470261	6
p.Ala4Thr	0.749054	0.202867	7
p.Ala4Val	1.04997	0.321081	4
p.Pro5Ala	0.736879	0.110259	3
p.Pro5His	0.969885	0.271751	3
p.Pro5Leu	1.16008	0.209679	6
p.Pro5Arg	1.05565	0.121017	7
p.Pro5Ser	0.642859	0.0930058	3
p.Pro5Thr	0.857691	0.339212	5
p.Pro6Ala	1.13391	0.0612294	3
p.Pro6Leu	0.71987	0.291486	3
p.Pro6Gln	1.13161	0.109322	4
p.Pro6Arg	0.747754	0.127857	3
p.Pro6Ser	0.893376	0.20478	3
p.Pro6Thr	0.956366	0.434761	4
p.Arg7Cys	0.972882	0.480407	5
p.Arg7Gly	0.644201	0.158907	4
p.Arg7His	0.83901	0.184422	3
p.Arg7Leu	1.17677	0.234263	5
p.Arg7Pro	0.686041	0.262858	4
p.Arg7Ser	0.849972	0.128563	3
p.Arg8Cys	0.902723	0.329662	4
p.Arg8Gly	1.38631	0.492979	4
p.Arg8His	0.605743	0.144895	4
p.Arg8Leu	1.15601	0.241227	4
p.Arg8Pro	0.919917	0.27467	5
p.Arg8Ser	0.855056	0.278933	5
p.Leu9Phe	0.74393	0.128605	6
p.Leu9His	0.717266	0.311717	5
p.Leu9Ile	1.18369	0.164596	3
p.Leu9Pro	0.698488	0.136168	5
p.Leu9Arg	0.318021	0.0561327	6
p.Leu9Val	0.922583	0.250513	4
p.Gly10Ala	0.805089	0.350638	4
p.Gly10Cys	0.877947	0.161223	4
p.Gly10Asp	0.615522	0.257347	4
p.Gly10Arg	0.962499	0.209728	12
p.Gly10Ser	1.15748	0.241119	3
p.Gly10Val	1.44775	0.239449	9
p.Leu11Met	1.49357	0.304372	10
p.Leu11Pro	0.80775	0.267592	4
p.Leu11Gln	0.658887	0.0512877	5
p.Leu11Arg	0.977976	0.332037	4
p.Leu11Val	0.752981	0.141303	3
p.Gly12Ala	0.612595	0.109982	4
p.Gly12Cys	0.625154	0.162623	5
p.Gly12Asp	0.791859	0.188343	5
p.Gly12Arg	0.65258	0.174066	7
p.Gly12Ser	0.894531	0.19121	3
p.Gly12Val	1.24698	0.100668	4
p.Pro13Ala	0.926248	0.34171	5
p.Pro13His	0.947645	0.291766	4
p.Pro13Leu	0.867973	0.320474	4
p.Pro13Arg	0.456723	0.0435291	7
p.Pro13Ser	0.882583	0.242859	3
p.Pro13Thr	0.657247	0.126612	4
p.Pro14Ala	0.815321	0.194655	11
p.Pro14Leu	1.23223	0.620597	5
p.Pro14Gln	0.821125	0.159166	3
p.Pro14Arg	1.59266	0.456857	6
p.Pro14Ser	1.49195	0.387929	11
p.Pro14Thr	1.06664	0.243775	9
p.Pro15Ala	1.51423	0.817551	4
p.Pro15His	0.89255	0.195051	3
p.Pro15Leu	0.748394	0.109088	3
p.Pro15Arg	0.961139	0.284931	5
p.Pro15Ser	1.18503	0.426537	6
p.Pro15Thr	1.46194	0.42037	6
p.Gly16Ala	1.08527	0.263026	5
p.Gly16Glu	0.880441	0.263894	4
p.Gly16Arg	0.728452	0.262032	5
p.Gly16Val	0.910475	0.211421	4
p.Gly16Trp	0.78395	0.145991	4
p.Asp17Ala	1.28742	0.296122	5
p.Asp17Glu	0.880112	0.210228	7
p.Asp17Gly	1.31371	0.178259	5
p.Asp17His	0.769222	0.0956037	3
p.Asp17Asn	1.01077	0.131209	3
p.Asp17Val	0.931485	0.214925	3
p.Asp17Tyr	0.59758	0.0970447	6
p.Ala18Asp	0.719043	0.241756	4
p.Ala18Gly	0.996656	0.395455	7
p.Ala18Pro	0.96184	0.331285	4
p.Ala18Ser	0.963538	0.307461	4
p.Ala18Thr	0.684755	0.143973	4
p.Ala18Val	1.51309	0.467692	5
p.Pro19Ala	1.0267	0.335796	5
p.Pro19His	1.02324	0.284034	3
p.Pro19Leu	1.00108	0.487406	6
p.Pro19Arg	0.854355	0.309608	6
p.Pro19Ser	0.954453	0.227922	4
p.Pro19Thr	0.666156	0.107945	4
p.Arg20Cys	1.5963	0.280955	5
p.Arg20Gly	1.2771	0.294507	4
p.Arg20His	0.844079	0.340113	7
p.Arg20Leu	0.978203	0.331615	5
p.Arg20Pro	0.81991	0.304813	5
p.Arg20Ser	0.00213002	0.0139695	7
p.Ala21Glu	0.569415	0.0515932	4
p.Ala21Gly	0.635889	0.119396	3
p.Ala21Pro	1.34962	0.237084	7
p.Ala21Ser	0.853186	0.105775	5
p.Ala21Thr	0.671522	0.223798	5
p.Ala21Val	0.811814	0.236066	6
p.Glu22Ala	0.757492	0.25174	5
p.Glu22Asp	0.908143	0.201357	6
p.Glu22Gly	0.295546	0.0904643	7
p.Glu22Lys	0.823778	0.357798	4
p.Glu22Gln	0.619317	0.179198	4
p.Glu22Val	0.819232	0.267512	3
p.Leu23Ile	0.576937	0.0597113	4
p.Leu23Pro	1.18753	0.374447	7
p.Leu23Gln	1.22208	0.3791	5
p.Leu23Arg	0.915261	0.271007	6
p.Leu23Val	0.784604	0.248757	7
p.Val24Ala	0.850366	0.239276	3
p.Val24Glu	0.73607	0.185369	7
p.Val24Gly	0.565375	0.0865259	4
p.Val24Leu	0.964699	0.264232	4
p.Val24Met	0.711928	0.0574457	5
p.Ala25Glu	0.902115	0.313242	5
p.Ala25Gly	1.26782	0.383617	5
p.Ala25Pro	0.932535	0.42972	4
p.Ala25Ser	0.777424	0.237503	4
p.Ala25Thr	0.61546	0.198683	4
p.Ala25Val	0.581982	0.127762	6
p.Leu26Phe	0.825073	0.167299	4
p.Leu26His	1.47222	0.290098	5
p.Leu26Ile	1.09737	0.286663	4
p.Leu26Pro	0.649253	0.123604	5
p.Leu26Arg	0.733682	0.154726	4
p.Leu26Val	0.911713	0.232365	8
p.Thr27Ala	1.01157	0.514039	4
p.Thr27Lys	0.964421	0.345632	8
p.Thr27Met	0.837129	0.265442	4
p.Thr27Pro	0.681803	0.133133	5
p.Thr27Arg	1.02822	0.260434	4
p.Thr27Ser	0.794716	0.225623	7
p.Ala28Asp	0.456286	0.0572679	7
p.Ala28Gly	0.644421	0.275987	7
p.Ala28Pro	1.04508	0.164463	4
p.Ala28Ser	0.782908	0.193131	6
p.Ala28Thr	0.80332	0.230756	4
p.Ala28Val	0.940382	0.0834636	5
p.Val29Ala	0.774388	0.25652	4
p.Val29Glu	1.17392	0.37581	4
p.Val29Gly	0.75616	0.199668	4
p.Val29Leu	0.8422	0.246199	6
p.Val29Met	0.781856	0.331004	5
p.Gln30Glu	0.852373	0.0459205	4
p.Gln30His	0.87237	0.267481	3
p.Gln30Lys	1.06669	0.363815	4
p.Gln30Leu	0.799652	0.233643	4
p.Gln30Pro	0.650596	0.182159	3
p.Gln30Arg	0.826926	0.423581	4
p.Ser31Cys	1.14146	0.222233	5
p.Ser31Gly	1.71727	0.274621	7
p.Ser31Ile	0.733119	0.147376	3
p.Ser31Asn	0.932758	0.174972	3
p.Ser31Arg	0.663556	0.140558	5
p.Ser31Thr	0.665464	0.119354	7
p.Glu32Ala	0.836391	0.377927	4
p.Glu32Asp	0.840554	0.0918901	4
p.Glu32Gly	0.972317	0.310699	4
p.Glu32Lys	0.822569	0.227051	5
p.Glu32Gln	0.755337	0.144958	7
p.Glu32Val	0.903434	0.289078	5
p.Gln33Glu	1.17048	0.298041	4
p.Gln33His	0.731447	0.115155	3
p.Gln33Lys	1.1889	0.461686	4
p.Gln33Leu	0.957274	0.293065	4
p.Gln33Pro	0.665818	0.135225	3
p.Gln33Arg	1.04025	0.280537	4
p.Gly34Ala	0.794082	0.316	5
p.Gly34Cys	1.24272	0.400621	5
p.Gly34Asp	0.846345	0.256424	5
p.Gly34Arg	1.35635	0.177877	3
p.Gly34Ser	0.841796	0.133385	4
p.Gly34Val	0.497414	0.125721	9
p.Glu35Ala	0.697223	0.205803	4
p.Glu35Asp	1.13154	0.480186	6
p.Glu35Gly	1.17427	0.369938	6
p.Glu35Lys	0.674297	0.26935	4
p.Glu35Gln	0.983649	0.229666	4
p.Glu35Val	0.714268	0.298292	4
p.Ala36Glu	0.885011	0.243363	4
p.Ala36Gly	0.955448	0.256194	3
p.Ala36Pro	0.791773	0.322921	5
p.Ala36Ser	1.3252	0.430708	5
p.Ala36Thr	0.901072	0.408785	5
p.Ala36Val	1.62057	0.37879	7
p.Gly37Ala	1.07843	0.259124	5
p.Gly37Cys	0.940022	0.312198	5
p.Gly37Asp	0.912041	0.258484	5
p.Gly37Arg	1.08109	0.367985	5
p.Gly37Ser	0.776148	0.158899	4
p.Gly37Val	1.05814	0.0552277	4
p.Gly38Ala	0.951921	0.240019	3
p.Gly38Glu	0.659805	0.0704952	4
p.Gly38Arg	0.81094	0.0910208	4
p.Gly38Val	0.696376	0.109309	7
p.Gly38Trp	0.454598	0.0685067	7
p.Gly39Ala	0.753652	0.136408	3
p.Gly39Cys	0.818313	0.107958	3
p.Gly39Asp	0.785867	0.081298	3
p.Gly39Arg	0.63997	0.17096	6
p.Gly39Ser	1.07725	0.560762	6
p.Gly39Val	0.64169	0.138712	4
p.Gly40Ala	1.18438	0.506627	4
p.Gly40Cys	0.859952	0.237491	6
p.Gly40Asp	0.782494	0.401665	4
p.Gly40Arg	0.893557	0.341795	4
p.Gly40Ser	0.804823	0.0420931	3
p.Gly40Val	0.713239	0.161049	6
p.Ser41Ala	0.908737	0.108615	4
p.Ser41Cys	0.776781	0.294119	4
p.Ser41Phe	0.0150134	0.00689053	6
p.Ser41Pro	0.753659	0.131382	4
p.Ser41Thr	0.91358	0.206478	3
p.Ser41Tyr	0.903474	0.302241	4
p.Pro42Ala	0.66469	0.167795	4
p.Pro42Leu	0.738616	0.163923	5
p.Pro42Gln	0.914543	0.216929	6
p.Pro42Arg	0.708508	0.116118	3
p.Pro42Ser	0.821173	0.110574	4
p.Pro42Thr	1.13173	0.43522	4
p.Arg43Cys	0.681389	0.105513	4
p.Arg43Gly	0.910487	0.119793	4
p.Arg43His	1.56023	0.215939	3
p.Arg43Leu	0.846684	0.0250412	3
p.Arg43Pro	0.883995	0.201856	4
p.Arg43Ser	0.0115159	0.0178847	7
p.Arg44Cys	0.850816	0.394471	5
p.Arg44Gly	0.931157	0.282706	4
p.Arg44His	0.902681	0.236208	4
p.Arg44Leu	1.14874	0.399558	4
p.Arg44Pro	0.692555	0.158021	7
p.Arg44Ser	0.676076	0.174902	5
p.Leu45Phe	1.30271	0.311706	6
p.Leu45His	0.868549	0.156456	5
p.Leu45Ile	0.996359	0.308923	5
p.Leu45Pro	0.862324	0.353157	5
p.Leu45Arg	1.12894	0.387986	5
p.Leu45Val	0.991716	0.267298	5
p.Gly46Ala	1.08454	0.17971	4
p.Gly46Cys	0.660662	0.210358	7
p.Gly46Asp	0.71844	0.227347	4
p.Gly46Arg	0.885704	0.310364	5
p.Gly46Ser	0.838998	0.28232	5
p.Gly46Val	1.2071	0.0508077	3
p.Leu47Phe	0.348387	0.0504171	5
p.Leu47His	0.921702	0.191914	5
p.Leu47Ile	0.724352	0.225046	5
p.Leu47Pro	0.768786	0.1565	6
p.Leu47Arg	1.01934	0.304486	4
p.Leu47Val	0.878898	0.349808	5
p.Leu48Met	0.802493	0.194481	6
p.Leu48Pro	0.0839563	0.0374824	8
p.Leu48Gln	0.997388	0.110771	4
p.Leu48Arg	0.928552	0.139449	4
p.Leu48Val	0.663853	0.293101	5
p.Gly49Ala	0.716704	0.188917	7
p.Gly49Cys	0.932206	0.201446	6
p.Gly49Asp	0.651945	0.228765	4
p.Gly49Arg	0.97345	0.303257	4
p.Gly49Ser	0.43052	0.107009	9
p.Gly49Val	0.329123	0.104889	9
p.Ser50Cys	0.12489	0.0524993	5
p.Ser50Gly	0.81624	0.286589	4
p.Ser50Ile	1.0986	0.35025	4
p.Ser50Asn	0.825035	0.389543	4
p.Ser50Arg	1.23888	0.108615	3
p.Ser50Thr	0.916949	0.258392	5
p.Pro51Ala	0.973994	0.234923	5
p.Pro51His	0.792246	0.231299	5
p.Pro51Leu	1.0437	0.346067	5
p.Pro51Arg	1.06653	0.319384	6
p.Pro51Ser	1.22605	0.261993	5
p.Pro51Thr	0.335674	0.0872978	8
p.Leu52Met	1.31033	0.290963	5
p.Leu52Pro	0.819836	0.153923	5
p.Leu52Gln	0.932986	0.533455	5
p.Leu52Arg	1.08172	0.465316	5
p.Leu52Val	1.14238	0.319726	4
p.Pro53Ala	1.26055	0.17465	5
p.Pro53Leu	1.16453	0.400025	5
p.Pro53Gln	1.29964	0.492705	5
p.Pro53Arg	1.52367	0.256417	4
p.Pro53Ser	1.1502	0.323322	5
p.Pro53Thr	0.937621	0.362662	6
p.Pro54Ala	0.737825	0.217799	5
p.Pro54Leu	1.13358	0.425566	7
p.Pro54Gln	1.15282	0.396723	3
p.Pro54Arg	1.12318	0.181033	3
p.Pro54Ser	1.30083	0.315595	3
p.Pro54Thr	1.07584	0.314873	3
p.Gly55Ala	1.18839	0.340308	4
p.Gly55Cys	1.4166	0.283967	6
p.Gly55Asp	1.74622	0.215848	6
p.Gly55Arg	1.12236	0.273945	5
p.Gly55Ser	1.30708	0.368736	4
p.Gly55Val	1.07134	0.182978	7
p.Ala56Glu	1.17532	0.222132	3
p.Ala56Gly	0.721695	0.106216	4
p.Ala56Pro	0.63301	0.22401	6
p.Ala56Ser	0.855816	0.205911	4
p.Ala56Thr	1.07638	0.131166	3
p.Ala56Val	1.19512	0.312415	4
p.Pro57Ala	1.49054	0.238127	12
p.Pro57His	1.57736	0.182235	7
p.Pro57Leu	1.39428	0.233596	6
p.Pro57Arg	1.56972	0.252168	8
p.Pro57Ser	1.50631	0.167675	13
p.Pro57Thr	0.965141	0.261549	3
p.Leu58Phe	1.22348	0.35281	5
p.Leu58His	0.931622	0.191015	5
p.Leu58Ile	1.78449	0.177536	11
p.Leu58Pro	1.52915	0.463266	4
p.Leu58Arg	1.24332	0.321856	3
p.Leu58Val	1.14998	0.246487	5
p.Pro59Ala	0.920325	0.323889	8
p.Pro59His	0.948184	0.115342	3
p.Pro59Leu	1.16407	0.270965	3
p.Pro59Arg	0.929612	0.300966	4
p.Pro59Ser	0.897848	0.228998	4
p.Pro59Thr	1.18874	0.371693	5
p.Gly60Ala	0.983686	0.275547	5
p.Gly60Glu	0.770816	0.127381	4
p.Gly60Arg	1.07705	0.316158	7
p.Gly60Val	0.671119	0.113681	5
p.Gly60Trp	1.22655	0.234768	4
p.Pro61Ala	0.77442	0.136498	5
p.Pro61Leu	1.0936	0.162966	4
p.Pro61Gln	0.712089	0.185149	5
p.Pro61Arg	0.798654	0.214688	5
p.Pro61Ser	1.11519	0.338095	3
p.Pro61Thr	0.982093	0.274009	5
p.Gly62Ala	1.2354	0.308871	4
p.Gly62Cys	1.11586	0.157359	3
p.Gly62Asp	1.23841	0.429953	4
p.Gly62Arg	0.927443	0.262911	7
p.Gly62Ser	0.868041	0.260729	5
p.Gly62Val	1.00663	0.174756	4
p.Ser63Ala	0.767863	0.205426	4
p.Ser63Cys	1.45706	0.389945	5
p.Ser63Phe	1.07951	0.228369	4
p.Ser63Pro	0.927895	0.0652386	5
p.Ser63Thr	1.01561	0.264515	5
p.Ser63Tyr	1.07453	0.197477	4
p.Gly64Ala	1.27971	0.367092	4
p.Gly64Cys	1.11057	0.259075	4
p.Gly64Asp	0.911838	0.204635	5
p.Gly64Arg	0.0158817	0.00596298	3
p.Gly64Ser	1.07574	0.285013	4
p.Gly64Val	0.931893	0.428325	4
p.Ser65Ala	0.996835	0.296897	5
p.Ser65Leu	0.946167	0.123635	5
p.Ser65Pro	1.12023	0.36373	5
p.Ser65Thr	1.08175	0.474219	4
p.Ser65Trp	0.987614	0.36577	4
p.Gly66Ala	0.901567	0.246296	5
p.Gly66Cys	0.852203	0.19674	4
p.Gly66Asp	1.12792	0.343444	3
p.Gly66Arg	0.978153	0.232568	5
p.Gly66Ser	0.766188	0.205168	5
p.Gly66Val	1.30509	0.502753	5
p.Ser67Ala	1.06609	0.395808	4
p.Ser67Cys	0.936371	0.27133	3
p.Ser67Phe	1.33912	0.327011	5
p.Ser67Pro	1.12558	0.184862	3
p.Ser67Thr	0.930783	0.37436	5
p.Ser67Tyr	0.809142	0.314306	4
p.Ala68Asp	1.15211	0.276242	4
p.Ala68Gly	0.860051	0.398913	6
p.Ala68Pro	0.810075	0.176715	5
p.Ala68Ser	0.918319	0.229569	3
p.Ala68Thr	1.07063	0.322878	5
p.Ala68Val	0.733647	0.110496	4
p.Cys69Phe	0.914846	0.265164	4
p.Cys69Gly	0.645022	0.116365	4
p.Cys69Arg	1.21222	0.165444	3
p.Cys69Ser	1.07322	0.230654	4
p.Cys69Trp	0.762548	0.141495	4
p.Cys69Tyr	1.3482	0.440998	6
p.Gly70Ala	1.36016	0.414852	4
p.Gly70Cys	1.02956	0.352875	4
p.Gly70Asp	0.919816	0.319672	5
p.Gly70Arg	1.02798	0.0562668	3
p.Gly70Ser	0.978417	0.161336	4
p.Gly70Val	0.745824	0.414883	6
p.Gln71Glu	1.09399	0.339664	5
p.Gln71His	0.889311	0.205859	4
p.Gln71Lys	0.908395	0.129807	5
p.Gln71Leu	0.80508	0.192312	4
p.Gln71Pro	1.45659	0.251042	6
p.Gln71Arg	1.40337	0.186387	6
p.Arg72Cys	2.49907	0.521053	9
p.Arg72Gly	0.767782	0.266119	5
p.Arg72His	0.789099	0.289617	5
p.Arg72Leu	1.19904	0.300622	5
p.Arg72Pro	0.860908	0.112124	4
p.Arg72Ser	0.503168	0.137525	10
p.Ser73Ala	0.992004	0.233298	4
p.Ser73Cys	1.19017	0.366517	4
p.Ser73Phe	1.10907	0.284024	4
p.Ser73Pro	1.06161	0.308131	5
p.Ser73Thr	1.01391	0.255211	5
p.Ser73Tyr	1.02939	0.109898	3
p.Ser74Ala	1.02129	0.392956	5
p.Ser74Leu	1.61285	0.165459	9
p.Ser74Pro	1.18952	0.275382	5
p.Ser74Thr	0.926501	0.089573	3
p.Ser74Trp	1.10751	0.362752	4
p.Ala75Asp	1.23505	0.258719	5
p.Ala75Gly	1.20404	0.438845	4
p.Ala75Pro	1.28113	0.345133	4
p.Ala75Ser	1.23692	0.317713	6
p.Ala75Thr	1.28406	0.0684796	4
p.Ala75Val	1.0728	0.181413	4
p.Ala76Glu	1.16105	0.273335	4
p.Ala76Gly	0.939693	0.383558	5
p.Ala76Pro	1.11885	0.12932	3
p.Ala76Ser	0.853917	0.201058	4
p.Ala76Thr	1.15157	0.165443	4
p.Ala76Val	1.17425	0.281301	5
p.His77Asp	1.33416	0.245081	4
p.His77Leu	1.06359	0.211786	5
p.His77Asn	1.16688	0.46695	7
p.His77Pro	0.873668	0.196711	4
p.His77Gln	0.871203	0.240886	5
p.His77Arg	0.817046	0.130773	4
p.His77Tyr	0.800656	0.116411	3
p.Lys78Glu	3.49738	0.713852	8
p.Lys78Met	0.866376	0.0729602	4
p.Lys78Asn	1.40257	0.356615	5
p.Lys78Gln	1.06751	0.347513	5
p.Lys78Arg	1.07269	0.376911	4
p.Lys78Thr	1.14169	0.575801	5
p.Arg79Cys	0.815069	0.358634	3
p.Arg79Gly	1.27288	0.216746	3
p.Arg79His	1.10907	0.473601	5
p.Arg79Leu	0.944978	0.314402	3
p.Arg79Pro	1.00307	0.38467	6
p.Arg79Ser	1.08525	0.555118	4
p.Tyr80Cys	0.83007	0.260393	6
p.Tyr80Asp	1.07092	0.184213	4
p.Tyr80Phe	0.996105	0.157017	4
p.Tyr80His	0.766429	0.326491	5
p.Tyr80Asn	0.363449	0.106987	7
p.Tyr80Ser	1.14093	0.106465	3
p.Arg81Cys	0.966538	0.170852	6
p.Arg81Gly	1.17583	0.305391	5
p.Arg81His	0.901078	0.362575	6
p.Arg81Leu	1.41763	0.512668	5
p.Arg81Pro	1.23337	0.241385	4
p.Arg81Ser	1.34187	0.190527	9
p.Arg82Cys	0.825545	0.302052	4
p.Arg82Gly	1.04707	0.31441	5
p.Arg82His	0.895966	0.298179	5
p.Arg82Leu	0.288283	0.149774	7
p.Arg82Pro	1.09778	0.402087	5
p.Arg82Ser	0.837366	0.352881	8
p.Leu83Met	1.28382	0.591451	3
p.Leu83Pro	0.854666	0.372131	4
p.Leu83Gln	0.462527	0.0882083	7
p.Leu83Arg	0.159705	0.0410785	4
p.Leu83Val	0.999341	0.376227	6
p.Gln84Glu	0.848991	0.186654	5
p.Gln84His	0.0342799	0.0175913	5
p.Gln84Lys	0.100135	0.0530357	4
p.Gln84Leu	0.0710771	0.0141362	5
p.Gln84Pro	0.0122184	0.00640735	6
p.Gln84Arg	0.990387	0.385955	4
p.Asn85Asp	4.63531	0.821184	7
p.Asn85His	1.52743	0.324762	6
p.Asn85Ile	1.03931	0.405048	5
p.Asn85Lys	0.997968	0.261015	7
p.Asn85Ser	1.40555	0.274526	5
p.Asn85Thr	2.35606	0.223366	10
p.Asn85Tyr	3.04054	0.597895	9
p.Trp86Cys	1.34255	0.383132	5
p.Trp86Gly	0.763913	0.0791733	8
p.Trp86Leu	0.880975	0.172875	4
p.Trp86Arg	0.482397	0.0453345	7
p.Trp86Ser	0.807293	0.133015	4
p.Val87Ala	1.14376	0.348079	6
p.Val87Asp	0.000809551	0.000210363	4
p.Val87Phe	1.11599	0.291855	4
p.Val87Gly	1.00723	0.275947	3
p.Val87Ile	1.1055	0.271124	3
p.Val87Leu	0.921657	0.232396	4
p.Tyr88Cys	0.0594281	0.0369988	7
p.Tyr88Asp	-0.00172926	0.0041599	5
p.Tyr88Phe	0.921549	0.454707	5
p.Tyr88His	0.870012	0.178962	6
p.Tyr88Asn	1.27927	0.476	7
p.Tyr88Ser	0.131622	0.0768471	7
p.Asn89Asp	2.36547	0.282246	12
p.Asn89His	1.07072	0.295877	3
p.Asn89Ile	1.61118	0.314679	3
p.Asn89Lys	1.19832	0.208221	8
p.Asn89Ser	1.25193	0.156257	4
p.Asn89Thr	1.91346	0.293528	7
p.Asn89Tyr	1.95473	0.329207	7
p.Val90Ala	2.45922	0.312021	11
p.Val90Glu	0.663529	0.167373	5
p.Val90Gly	2.43385	0.507523	7
p.Val90Leu	0.370041	0.0579866	6
p.Val90Met	1.59368	0.379802	8
p.Leu91Met	1.14864	0.454496	3
p.Leu91Pro	-0.0129782	0.0126224	4
p.Leu91Gln	0.0772006	0.0458057	3
p.Leu91Arg	0.0392022	0.0502615	5
p.Leu91Val	1.04765	0.36538	3
p.Glu92Ala	0.0179478	0.0205338	4
p.Glu92Asp	0.733214	0.211462	5
p.Glu92Gly	-0.0286148	0.0232545	4
p.Glu92Lys	0.0200364	0.0141145	4
p.Glu92Gln	0.961181	0.21798	6
p.Glu92Val	0.310386	0.117052	5
p.Arg93Gly	1.15953	0.316253	4
p.Arg93Leu	3.01608	0.62618	7
p.Arg93Pro	0.00252939	0.0171892	4
p.Arg93Gln	4.14699	1.30567	7
p.Arg93Trp	1.2906	0.378519	4
p.Pro94Ala	0.197626	0.0365917	7
p.Pro94His	0.0926594	0.0681461	6
p.Pro94Leu	-0.0129292	0.0146821	5
p.Pro94Arg	-0.00492508	0.0295293	6
p.Pro94Ser	0.250934	0.117773	6
p.Pro94Thr	0.0737083	0.0427644	6
p.Arg95Cys	1.01984	0.426999	4
p.Arg95Gly	0.699787	0.230647	5
p.Arg95His	1.38658	0.365942	4
p.Arg95Leu	0.167419	0.0889793	3
p.Arg95Pro	0.0542251	0.0320092	3
p.Arg95Ser	1.2028	0.509266	8
p.Gly96Ala	1.11759	0.0866708	4
p.Gly96Cys	0.0224309	0.00915504	3
p.Gly96Asp	1.47157	0.767598	4
p.Gly96Arg	1.47999	0.429607	6
p.Gly96Ser	1.24438	0.186231	6
p.Gly96Val	0.243274	0.0902971	4
p.Trp97Cys	1.55263	0.176401	4
p.Trp97Gly	0.877319	0.158828	6
p.Trp97Leu	1.34512	0.267721	3
p.Trp97Arg	1.27297	0.105143	4
p.Trp97Ser	1.34922	0.4174	4
p.Ala98Asp	1.11664	0.311838	3
p.Ala98Gly	0.664308	0.204377	4
p.Ala98Pro	0.818788	0.247735	7
p.Ala98Ser	0.680614	0.14175	3
p.Ala98Thr	0.763563	0.0707882	3
p.Ala98Val	0.763073	0.188488	7
p.Phe99Cys	1.11347	0.341354	8
p.Phe99Ile	0.756806	0.226818	7
p.Phe99Leu	1.00005	0.336857	4
p.Phe99Ser	1.04342	0.335535	3
p.Phe99Val	0.957764	0.13437	3
p.Phe99Tyr	1.0404	0.322908	6
p.Val100Ala	1.02217	0.276203	7
p.Val100Asp	0.00923775	0.00833757	5
p.Val100Phe	-0.0634657	0.0370888	4
p.Val100Gly	1.04593	0.591324	4
p.Val100Ile	0.938996	0.109955	6
p.Val100Leu	0.728192	0.179371	7
p.Tyr101Cys	0.050651	0.0122344	4
p.Tyr101Asp	0.00878184	0.00311148	3
p.Tyr101Phe	0.858855	0.0719591	3
p.Tyr101His	0.630923	0.112813	7
p.Tyr101Asn	-0.0208561	0.00913886	3
p.Tyr101Ser	-0.00268695	0.00901236	4
p.His102Asp	0.0672288	0.0215896	4
p.His102Leu	0.0952704	0.0261251	8
p.His102Asn	0.926185	0.438466	6
p.His102Pro	0.75993	0.268854	5
p.His102Gln	0.932251	0.22165	7
p.His102Arg	0.316075	0.0821921	10
p.His102Tyr	1.41795	0.14571	5
p.Val103Ala	0.881867	0.258604	4
p.Val103Asp	-0.0242935	0.0206511	4
p.Val103Phe	0.771386	0.173842	5
p.Val103Gly	0.945756	0.236419	6
p.Val103Ile	0.990673	0.244838	5
p.Val103Leu	0.279776	0.0981713	8
p.Phe104Cys	1.00922	0.377868	3
p.Phe104Ile	0.864465	0.266787	8
p.Phe104Leu	0.68775	0.223441	5
p.Phe104Ser	0.0314671	0.0343233	3
p.Phe104Val	1.32627	0.38993	4
p.Phe104Tyr	0.742507	0.254915	3
p.Ile105Lys	-0.00426179	0.0139408	5
p.Ile105Leu	0.85484	0.428622	5
p.Ile105Met	0.788784	0.18002	3
p.Ile105Arg	-0.130375	0.1181	5
p.Ile105Thr	0.80032	0.255353	5
p.Ile105Val	1.12514	0.0611036	4
p.Phe106Cys	1.02539	0.246474	6
p.Phe106Ile	0.655784	0.16019	4
p.Phe106Leu	0.949094	0.270976	3
p.Phe106Ser	0.878342	0.316368	8
p.Phe106Val	1.01352	0.330698	4
p.Phe106Tyr	0.902019	0.374643	7
p.Leu107Phe	0.642101	0.137681	3
p.Leu107Met	0.822306	0.200185	7
p.Leu107Ser	0.00362404	0.00624017	4
p.Leu107Val	0.755078	0.164607	9
p.Leu107Trp	0.35414	0.0538968	7
p.Leu108Met	0.890376	0.298592	3
p.Leu108Pro	0.813101	0.179972	6
p.Leu108Gln	0.696226	0.262818	4
p.Leu108Arg	-0.00573802	0.0281612	4
p.Leu108Val	0.855247	0.277682	4
p.Val109Ala	0.153446	0.0399479	9
p.Val109Asp	-0.0176914	0.0131628	4
p.Val109Phe	0.991048	0.281323	4
p.Val109Gly	0.162181	0.0418083	6
p.Val109Ile	1.68288	0.228932	7
p.Val109Leu	0.746723	0.07068	5
p.Phe110Cys	0.857407	0.151025	4
p.Phe110Ile	0.982814	0.363472	4
p.Phe110Leu	0.261601	0.0595172	9
p.Phe110Ser	0.943871	0.270161	4
p.Phe110Val	0.761902	0.197177	3
p.Phe110Tyr	0.88933	0.217361	3
p.Ser111Cys	0.908363	0.110682	3
p.Ser111Gly	0.711659	0.151277	4
p.Ser111Ile	0.738128	0.0755352	3
p.Ser111Asn	0.672703	0.15401	4
p.Ser111Arg	0.104212	0.0275393	7
p.Ser111Thr	0.731508	0.360748	3
p.Cys112Phe	0.593498	0.0925446	6
p.Cys112Gly	0.917602	0.228583	4
p.Cys112Arg	0.623879	0.0417351	5
p.Cys112Ser	0.702587	0.224488	3
p.Cys112Trp	-0.0171558	0.0080921	4
p.Cys112Tyr	0.818934	0.347394	4
p.Leu113Met	0.941635	0.471762	5
p.Leu113Pro	0.920168	0.148465	5
p.Leu113Gln	1.15303	0.490393	5
p.Leu113Arg	1.15965	0.418846	3
p.Leu113Val	0.807453	0.147487	5
p.Val114Ala	2.7295	0.443732	8
p.Val114Glu	1.08484	0.311436	3
p.Val114Gly	0.791683	0.318284	7
p.Val114Leu	1.9671	0.492617	5
p.Val114Met	0.380008	0.0650092	9
p.Leu115Met	1.19206	0.319767	3
p.Leu115Pro	0.806552	0.215012	4
p.Leu115Gln	1.03181	0.148965	7
p.Leu115Arg	1.00291	0.575674	5
p.Leu115Val	1.09172	0.567503	4
p.Ser116Ala	0.873759	0.297808	4
p.Ser116Cys	0.776873	0.28949	4
p.Ser116Phe	1.91193	0.250801	14
p.Ser116Pro	0.740558	0.139866	8
p.Ser116Thr	1.01399	0.165564	6
p.Ser116Tyr	0.684821	0.0563087	4
p.Val117Ala	1.13047	0.32055	3
p.Val117Glu	0.238286	0.0626026	5
p.Val117Gly	1.13222	0.344104	7
p.Val117Leu	0.861465	0.148505	3
p.Val117Met	1.11077	0.0418636	3
p.Leu118Met	1.14238	0.353087	6
p.Leu118Pro	0.24799	0.0467407	8
p.Leu118Gln	0.868555	0.208312	7
p.Leu118Arg	0.733087	0.263524	4
p.Leu118Val	0.904558	0.375853	4
p.Ser119Ala	0.9745	0.306567	6
p.Ser119Cys	0.193304	0.0539086	6
p.Ser119Phe	1.06348	0.0429892	4
p.Ser119Pro	0.877125	0.150608	6
p.Ser119Thr	0.728398	0.158055	5
p.Ser119Tyr	1.09345	0.362136	4
p.Thr120Ala	0.752682	0.290179	8
p.Thr120Ile	0.586384	0.0940544	5
p.Thr120Asn	0.864301	0.250934	4
p.Thr120Pro	0.966449	0.246727	8
p.Thr120Ser	1.13746	0.166275	7
p.Ile121Phe	0.861034	0.223241	7
p.Ile121Leu	0.962042	0.380195	3
p.Ile121Met	1.22985	0.552825	5
p.Ile121Asn	0.893474	0.226843	4
p.Ile121Ser	0.822246	0.185721	8
p.Ile121Thr	0.962281	0.143658	4
p.Ile121Val	0.87382	0.252868	3
p.Gln122Glu	0.915001	0.158504	5
p.Gln122His	0.813878	0.14068	6
p.Gln122Lys	0.713475	0.198759	4
p.Gln122Leu	0.0152056	0.0232647	6
p.Gln122Pro	0.983481	0.185267	3
p.Gln122Arg	0.946703	0.159513	7
p.Glu123Ala	0.617646	0.0242983	3
p.Glu123Asp	0.888846	0.21241	3
p.Glu123Gly	0.852514	0.169016	10
p.Glu123Lys	0.332909	0.0971207	7
p.Glu123Gln	1.09647	0.258873	10
p.Glu123Val	1.07054	0.197805	17
p.His124Asp	0.718031	0.190971	6
p.His124Leu	0.891022	0.293163	7
p.His124Asn	0.640556	0.0769691	4
p.His124Pro	1.13304	0.194542	10
p.His124Gln	0.930007	0.242787	6
p.His124Arg	0.813033	0.18781	4
p.His124Tyr	0.956243	0.198128	7
p.Gln125Glu	0.788772	0.119227	5
p.Gln125His	0.776363	0.147866	6
p.Gln125Lys	0.742434	0.117456	9
p.Gln125Leu	0.859483	0.107025	5
p.Gln125Pro	0.755498	0.18042	5
p.Gln125Arg	1.0745	0.287419	6
p.Glu126Ala	0.838703	0.253995	5
p.Glu126Asp	0.815652	0.175046	4
p.Glu126Gly	0.723306	0.0933659	4
p.Glu126Lys	0.606489	0.106316	7
p.Glu126Gln	1.02266	0.187997	9
p.Glu126Val	0.925045	0.181606	3
p.Leu127Phe	1.00756	0.130701	12
p.Leu127His	1.06535	0.203313	9
p.Leu127Ile	0.833513	0.121242	10
p.Leu127Pro	0.828979	0.0806761	6
p.Leu127Arg	0.579936	0.0739681	3
p.Leu127Val	0.651893	0.100651	4
p.Ala128Asp	0.799089	0.167827	8
p.Ala128Gly	1.00302	0.20606	4
p.Ala128Pro	0.956364	0.191946	4
p.Ala128Ser	0.653538	0.204586	3
p.Ala128Thr	1.02154	0.443121	3
p.Ala128Val	0.749456	0.27995	3
p.Asn129Asp	1.07372	0.500206	3
p.Asn129His	0.893574	0.159449	4
p.Asn129Ile	0.928504	0.184794	10
p.Asn129Lys	0.855102	0.188302	11
p.Asn129Ser	0.0299846	0.0194972	8
p.Asn129Thr	0.975005	0.137646	9
p.Asn129Tyr	0.822513	0.233163	5
p.Glu130Ala	1.0664	0.123268	13
p.Glu130Asp	0.80117	0.0684971	4
p.Glu130Gly	1.01834	0.48557	4
p.Glu130Lys	0.641535	0.177611	6
p.Glu130Gln	1.11146	0.22935	9
p.Glu130Val	0.830238	0.114324	3
p.Cys131Phe	1.30275	0.172056	13
p.Cys131Gly	0.641369	0.065236	5
p.Cys131Arg	0.611611	0.125952	4
p.Cys131Ser	0.82846	0.159314	5
p.Cys131Trp	0.938877	0.168626	10
p.Cys131Tyr	1.04314	0.234269	9
p.Leu132Phe	1.65482	0.206288	5
p.Leu132His	1.16381	0.131045	4
p.Leu132Ile	2.21099	0.323885	16
p.Leu132Pro	0.475336	0.0678155	6
p.Leu132Arg	1.16137	0.448924	3
p.Leu132Val	1.3031	0.385048	4
p.Leu133Phe	0.673441	0.158943	3
p.Leu133His	0.812522	0.327858	4
p.Leu133Ile	0.868963	0.33504	4
p.Leu133Pro	0.857164	0.23384	4
p.Leu133Arg	0.655924	0.106984	4
p.Leu133Val	1.21404	0.384167	4
p.Ile134Phe	1.1089	0.267576	6
p.Ile134Leu	1.09184	0.278207	5
p.Ile134Met	0.862712	0.26743	6
p.Ile134Asn	0.981985	0.237251	4
p.Ile134Ser	0.720099	0.26906	4
p.Ile134Thr	1.14013	0.258886	5
p.Ile134Val	0.656275	0.123359	4
p.Leu135Phe	1.42011	0.314766	5
p.Leu135Met	0.984217	0.24207	3
p.Leu135Ser	0.845571	0.180029	3
p.Leu135Val	0.742359	0.278055	5
p.Leu135Trp	0.955673	0.322268	4
p.Glu136Ala	1.28946	0.46641	4
p.Glu136Asp	2.39026	0.255929	14
p.Glu136Gly	2.01805	0.252561	15
p.Glu136Lys	0.498866	0.138665	8
p.Glu136Gln	1.41811	0.40427	7
p.Glu136Val	0.632031	0.0781615	3
p.Phe137Cys	1.00933	0.255459	3
p.Phe137Ile	0.813938	0.153147	3
p.Phe137Leu	1.21846	0.404382	5
p.Phe137Ser	0.973398	0.174263	4
p.Phe137Val	0.637118	0.154911	3
p.Phe137Tyr	0.760542	0.149781	4
p.Val138Ala	0.821354	0.0994804	3
p.Val138Glu	0.0358248	0.0263706	3
p.Val138Gly	1.14752	0.204623	6
p.Val138Leu	1.21719	0.514869	5
p.Val138Met	0.99124	0.333182	3
p.Met139Ile	0.904526	0.188458	7
p.Met139Lys	0.0591385	0.0955057	3
p.Met139Leu	1.52721	0.328302	8
p.Met139Arg	0.885812	0.190001	7
p.Met139Thr	0.968051	0.271241	4
p.Met139Val	1.44258	0.310694	4
p.Ile140Phe	1.02767	0.234315	3
p.Ile140Leu	0.866837	0.262403	4
p.Ile140Met	1.16204	0.332684	6
p.Ile140Asn	0.32923	0.126874	5
p.Ile140Ser	1.12366	0.213681	3
p.Ile140Thr	0.752538	0.160766	4
p.Ile140Val	0.89801	0.376861	4
p.Val141Ala	0.996858	0.48036	6
p.Val141Glu	0.316618	0.121584	5
p.Val141Gly	1.60318	0.306786	5
p.Val141Leu	1.04935	0.280436	4
p.Val141Met	1.2432	0.511858	4
p.Val142Ala	0.629139	0.109312	4
p.Val142Asp	0.0137661	0.0330008	3
p.Val142Phe	1.2548	0.267825	6
p.Val142Gly	1.19647	0.524484	5
p.Val142Ile	1.07813	0.151282	11
p.Val142Leu	1.27647	0.181028	6
p.Phe143Cys	0.779001	0.127924	3
p.Phe143Ile	0.975551	0.336029	4
p.Phe143Leu	1.15783	0.263616	6
p.Phe143Ser	1.09654	0.383131	4
p.Phe143Val	1.1457	0.197042	3
p.Phe143Tyr	0.964367	0.254545	4
p.Gly144Ala	1.11244	0.417278	4
p.Gly144Cys	0.915992	0.311193	3
p.Gly144Asp	0.550954	0.1226	5
p.Gly144Arg	-0.00695142	0.00793149	3
p.Gly144Ser	0.883926	0.107504	4
p.Gly144Val	0.898134	0.116342	3
p.Leu145Phe	0.850307	0.310323	4
p.Leu145Met	0.75696	0.237114	5
p.Leu145Ser	1.24305	0.312212	3
p.Leu145Val	1.01525	0.350577	3
p.Leu145Trp	1.04197	0.495101	3
p.Glu146Ala	-0.0164073	0.0231847	3
p.Glu146Asp	0.900692	0.290717	3
p.Glu146Gly	-0.0545523	0.0562749	3
p.Glu146Lys	0.0297901	0.0127297	3
p.Glu146Gln	0.05605	0.0244483	3
p.Glu146Val	-0.00553452	0.0326109	5
p.Tyr147Cys	0.745143	0.139842	3
p.Tyr147Asp	0.656182	0.129443	4
p.Tyr147Phe	1.24047	0.218564	5
p.Tyr147His	0.277149	0.097391	6
p.Tyr147Asn	0.564238	0.0619452	6
p.Tyr147Ser	0.418515	0.0427606	7
p.Ile148Phe	1.21493	0.603474	4
p.Ile148Leu	0.12293	0.0853636	6
p.Ile148Met	0.805443	0.194334	4
p.Ile148Asn	0.339026	0.118249	4
p.Ile148Ser	0.970383	0.288201	6
p.Ile148Thr	1.01127	0.188133	9
p.Ile148Val	1.15369	0.190539	9
p.Val149Ala	1.8384	0.178595	7
p.Val149Asp	-0.030819	0.025107	3
p.Val149Phe	1.12958	0.404539	3
p.Val149Gly	0.619942	0.115769	4
p.Val149Ile	0.734734	0.190606	4
p.Val149Leu	1.4916	0.357754	5
p.Arg150Gly	0.0412598	0.032866	5
p.Arg150Leu	1.13288	0.364121	4
p.Arg150Pro	0.00880525	0.0105647	3
p.Arg150Gln	0.0693157	0.0465041	5
p.Arg150Trp	0.279461	0.0487131	5
p.Val151Ala	0.317351	0.0561213	5
p.Val151Asp	-0.00712655	0.00781178	4
p.Val151Phe	0.938328	0.437215	3
p.Val151Gly	0.222603	0.0687921	6
p.Val151Ile	1.15445	0.297762	4
p.Val151Leu	1.0704	0.303559	4
p.Trp152Cys	-0.0479237	0.0819329	3
p.Trp152Gly	0.0215178	0.00895975	3
p.Trp152Leu	0.107102	0.0744208	4
p.Trp152Arg	-0.00248657	0.00682839	3
p.Trp152Ser	-0.000608087	0.0105163	3
p.Ser153Ala	1.18633	0.377022	9
p.Ser153Cys	0.978797	0.194886	7
p.Ser153Phe	-0.0717959	0.042373	4
p.Ser153Pro	-0.00899193	0.0173712	3
p.Ser153Thr	0.208959	0.117598	4
p.Ser153Tyr	-0.00527317	0.0113046	4
p.Ala154Asp	-0.020272	0.00843607	3
p.Ala154Gly	0.0454162	0.0244177	5
p.Ala154Pro	-0.00174756	0.00662884	6
p.Ala154Ser	1.10512	0.301421	7
p.Ala154Thr	0.0782181	0.0397334	6
p.Ala154Val	1.40355	0.291226	10
p.Gly155Ala	0.632781	0.11564	8
p.Gly155Glu	0.08062	0.0479465	3
p.Gly155Arg	-0.00305245	0.00879609	4
p.Gly155Val	-0.036052	0.0196173	5
p.Cys156Phe	0.984314	0.150357	12
p.Cys156Gly	4.84393	0.696615	6
p.Cys156Arg	0.847447	0.144658	4
p.Cys156Ser	2.95486	0.700486	9
p.Cys156Trp	0.991004	0.155983	12
p.Cys156Tyr	1.65948	0.2601	14
p.Cys157Phe	2.02843	0.341132	12
p.Cys157Gly	1.80798	0.220917	16
p.Cys157Arg	0.967977	0.158147	9
p.Cys157Ser	2.13876	0.265795	18
p.Cys157Trp	1.19918	0.275819	9
p.Cys157Tyr	1.49063	0.202549	8
p.Cys158Phe	3.2101	0.555639	17
p.Cys158Gly	0.926354	0.139808	3
p.Cys158Arg	1.81803	0.208415	13
p.Cys158Ser	0.83362	0.397632	4
p.Cys158Trp	2.37741	0.311714	12
p.Cys158Tyr	1.84282	0.260255	5
p.Arg159Cys	1.19033	0.210974	6
p.Arg159Gly	3.20293	0.513651	7
p.Arg159His	4.11317	0.811673	7
p.Arg159Leu	3.11859	0.662619	5
p.Arg159Pro	3.81379	0.8107	5
p.Arg159Ser	3.44593	0.373321	7
p.Tyr160Cys	-0.0306151	0.0108827	5
p.Tyr160Asp	0.00591556	0.00568897	9
p.Tyr160Phe	0.614412	0.241985	5
p.Tyr160His	0.113041	0.026182	7
p.Tyr160Asn	0.0537084	0.0128944	5
p.Tyr160Ser	-0.0103734	0.0108017	7
p.Arg161Gly	3.00107	0.831108	6
p.Arg161Leu	0.728342	0.233149	5
p.Arg161Pro	0.0863983	0.0365382	5
p.Arg161Gln	1.33311	0.227317	6
p.Gly162Ala	0.767357	0.0573548	3
p.Gly162Glu	0.667814	0.0796559	3
p.Gly162Arg	0.201434	0.0497791	4
p.Gly162Val	0.00256463	0.00338239	7
p.Trp163Cys	0.799341	0.127539	7
p.Trp163Gly	0.185336	0.0811215	7
p.Trp163Leu	0.94863	0.315073	3
p.Trp163Arg	0.602132	0.138923	3
p.Trp163Ser	0.18862	0.0978904	5
p.Gln164Glu	0.768085	0.217909	3
p.Gln164His	0.782725	0.318611	4
p.Gln164Lys	0.7166	0.0645883	4
p.Gln164Leu	0.718427	0.0979047	3
p.Gln164Pro	0.846569	0.236749	3
p.Gln164Arg	0.883668	0.199523	3
p.Gly165Ala	0.0987477	0.061919	4
p.Gly165Cys	-0.0209933	0.0133098	5
p.Gly165Asp	-0.00973716	0.0233253	5
p.Gly165Arg	-0.00170043	0.0100808	6
p.Gly165Ser	-0.010682	0.0140939	5
p.Gly165Val	-0.0046673	0.012036	5
p.Arg166Cys	1.08797	0.795919	4
p.Arg166Gly	0.284191	0.0499477	11
p.Arg166His	0.868836	0.190374	3
p.Arg166Leu	1.73278	0.214276	10
p.Arg166Pro	0.0266634	0.0286075	7
p.Arg166Ser	0.861466	0.361951	8
p.Phe167Cys	1.00124	0.391277	4
p.Phe167Ile	0.715409	0.132934	5
p.Phe167Leu	0.976235	0.205021	7
p.Phe167Ser	0.703587	0.228514	5
p.Phe167Val	1.17238	0.158268	8
p.Phe167Tyr	1.01282	0.175652	7
p.Arg168Cys	1.76919	0.234023	14
p.Arg168Gly	0.798655	0.28133	3
p.Arg168His	1.63383	0.232542	9
p.Arg168Leu	1.84976	0.309512	8
p.Arg168Pro	-0.0138268	0.00732976	8
p.Arg168Ser	1.12824	0.15651	6
p.Phe169Cys	0.00149203	0.0086317	4
p.Phe169Ile	0.000218098	0.00844401	4
p.Phe169Leu	0.167779	0.0669238	5
p.Phe169Ser	-0.075452	0.0537508	5
p.Phe169Val	-0.00856165	0.00740045	5
p.Phe169Tyr	0.93449	0.158713	9
p.Ala170Asp	-0.00143132	0.00734536	5
p.Ala170Gly	0.682666	0.108968	5
p.Ala170Pro	-0.0212298	0.010883	6
p.Ala170Ser	1.09826	0.196691	3
p.Ala170Thr	1.05349	0.40897	3
p.Ala170Val	1.2044	0.275611	7
p.Arg171Gly	0.780573	0.153395	4
p.Arg171Ile	1.41044	0.23146	9
p.Arg171Lys	0.915726	0.240664	9
p.Arg171Ser	1.36622	0.272105	7
p.Arg171Thr	1.17921	0.245865	6
p.Lys172Glu	1.07799	0.297826	4
p.Lys172Met	1.43821	0.365274	10
p.Lys172Asn	1.60201	0.297122	8
p.Lys172Gln	0.895582	0.225117	3
p.Lys172Arg	0.775488	0.144095	4
p.Lys172Thr	1.20162	0.168505	4
p.Pro173Ala	0.66459	0.225125	5
p.Pro173His	0.235047	0.0730526	5
p.Pro173Leu	0.970853	0.190954	3
p.Pro173Arg	0.240956	0.132249	5
p.Pro173Ser	0.847059	0.223312	7
p.Pro173Thr	0.677158	0.128177	4
p.Phe174Cys	0.677758	0.231631	3
p.Phe174Ile	0.797746	0.154386	5
p.Phe174Leu	1.26407	0.127549	8
p.Phe174Ser	1.01076	0.443435	5
p.Phe174Val	2.33946	0.295184	13
p.Phe174Tyr	1.14064	0.0948286	4
p.Cys175Phe	0.713751	0.274679	4
p.Cys175Gly	1.47366	0.666462	5
p.Cys175Arg	0.912072	0.297222	9
p.Cys175Ser	0.831447	0.313442	4
p.Cys175Trp	0.22846	0.0428094	11
p.Cys175Tyr	0.884928	0.220636	3
p.Val176Ala	1.22501	0.217623	9
p.Val176Asp	-0.0112273	0.005802	5
p.Val176Phe	0.0350415	0.0119163	7
p.Val176Gly	0.62119	0.132873	4
p.Val176Ile	0.815435	0.227016	10
p.Val176Leu	0.970134	0.219404	10
p.Ile177Phe	1.10714	0.227019	9
p.Ile177Leu	0.754948	0.269113	4
p.Ile177Met	0.681808	0.113715	3
p.Ile177Asn	0.81138	0.174489	5
p.Ile177Ser	1.40254	0.271935	16
p.Ile177Thr	0.616582	0.130846	7
p.Ile177Val	0.967294	0.301668	6
p.Asp178Ala	0.894494	0.168098	3
p.Asp178Glu	1.7131	0.20868	8
p.Asp178Gly	0.509272	0.153061	4
p.Asp178His	0.794736	0.206979	3
p.Asp178Asn	0.0050285	0.00314791	8
p.Asp178Val	0.0673803	0.0347706	6
p.Asp178Tyr	0.806826	0.299485	5
p.Phe179Cys	0.767087	0.260181	5
p.Phe179Ile	0.0054275	0.00937311	4
p.Phe179Leu	0.966652	0.199039	11
p.Phe179Ser	0.682563	0.167981	3
p.Phe179Val	0.922982	0.20757	5
p.Phe179Tyr	0.0079917	0.0131352	6
p.Ile180Phe	0.651905	0.107569	5
p.Ile180Leu	0.834158	0.205411	4
p.Ile180Met	0.847444	0.107876	3
p.Ile180Asn	-0.017419	0.0230351	5
p.Ile180Ser	0.799716	0.25082	8
p.Ile180Thr	1.17623	0.37131	6
p.Ile180Val	0.924361	0.402246	4
p.Val181Ala	0.798117	0.171952	3
p.Val181Glu	0.230592	0.140493	8
p.Val181Gly	0.85981	0.212123	10
p.Val181Leu	1.25175	0.126094	3
p.Val181Met	0.956877	0.216411	9
p.Phe182Cys	1.1061	0.468333	3
p.Phe182Ile	0.867113	0.141888	6
p.Phe182Leu	0.828963	0.210568	4
p.Phe182Ser	1.05109	0.367705	7
p.Phe182Val	0.638846	0.0961934	3
p.Phe182Tyr	0.850554	0.38615	3
p.Val183Ala	0.859383	0.1923	8
p.Val183Glu	0.0464913	0.0217533	6
p.Val183Gly	0.7395	0.221064	4
p.Val183Leu	1.2907	0.129335	15
p.Val183Met	0.699546	0.226983	3
p.Ala184Asp	0.743502	0.117746	3
p.Ala184Gly	1.01484	0.296251	4
p.Ala184Pro	0.593404	0.0801279	5
p.Ala184Ser	0.927146	0.322548	4
p.Ala184Thr	0.757558	0.343339	4
p.Ala184Val	0.851076	0.142008	16
p.Ser185Ala	0.903744	0.2639	6
p.Ser185Leu	0.948097	0.233721	5
p.Ser185Pro	0.459908	0.157109	12
p.Ser185Thr	1.00921	0.395323	4
p.Ser185Trp	0.136659	0.0713855	8
p.Val186Ala	0.912394	0.120941	7
p.Val186Glu	-0.00803406	0.00506107	4
p.Val186Gly	0.11952	0.0488093	7
p.Val186Leu	0.846062	0.254286	5
p.Val186Met	0.907021	0.21611	5
p.Ala187Asp	-0.0313327	0.0538283	4
p.Ala187Gly	0.87557	0.209831	7
p.Ala187Pro	0.973699	0.200599	6
p.Ala187Ser	0.804379	0.122211	5
p.Ala187Thr	0.786987	0.126123	3
p.Ala187Val	0.966104	0.16274	8
p.Val188Ala	0.821925	0.349825	4
p.Val188Asp	1.00387	0.231674	7
p.Val188Phe	0.731822	0.251907	3
p.Val188Gly	0.94568	0.345033	4
p.Val188Ile	1.1551	0.344573	4
p.Val188Leu	0.681003	0.232708	3
p.Ile189Phe	0.71841	0.135232	6
p.Ile189Leu	0.066187	0.013806	6
p.Ile189Met	0.998383	0.216888	9
p.Ile189Asn	0.625092	0.0694506	8
p.Ile189Ser	0.761788	0.228918	3
p.Ile189Thr	0.872758	0.306998	3
p.Ile189Val	-0.0102423	0.0286976	4
p.Ala190Asp	0.0374282	0.0144037	5
p.Ala190Gly	0.862921	0.169103	6
p.Ala190Pro	0.0607644	0.0882934	4
p.Ala190Ser	0.623569	0.198987	3
p.Ala190Thr	0.971411	0.120612	4
p.Ala190Val	1.14366	0.189665	5
p.Ala191Glu	1.0796	0.627613	4
p.Ala191Gly	0.633623	0.206448	3
p.Ala191Pro	0.778806	0.207334	4
p.Ala191Ser	1.06021	0.204232	7
p.Ala191Thr	0.180676	0.0668991	7
p.Ala191Val	1.14087	0.208955	7
p.Gly192Ala	-0.0147484	0.012335	4
p.Gly192Cys	0.331438	0.0956123	7
p.Gly192Asp	0.973959	0.264312	4
p.Gly192Arg	1.02783	0.404315	3
p.Gly192Ser	0.642438	0.164489	3
p.Gly192Val	0.0559875	0.0261086	4
p.Thr193Ala	0.865132	0.253039	6
p.Thr193Ile	0.00757776	0.00940884	8
p.Thr193Asn	0.677198	0.0810939	3
p.Thr193Pro	0.656471	0.13875	7
p.Thr193Ser	0.658306	0.147619	4
p.Gln194Glu	0.79486	0.353837	4
p.Gln194His	0.876645	0.130851	4
p.Gln194Lys	1.20109	0.579492	4
p.Gln194Leu	1.13089	0.250004	5
p.Gln194Pro	0.607425	0.0856585	5
p.Gln194Arg	0.599328	0.0999004	4
p.Gly195Ala	0.804037	0.21966	4
p.Gly195Cys	0.857763	0.0928916	4
p.Gly195Asp	0.696044	0.309816	3
p.Gly195Arg	0.712024	0.157951	4
p.Gly195Ser	1.12318	0.12791	8
p.Gly195Val	0.753834	0.130909	11
p.Asn196Asp	0.866043	0.195618	4
p.Asn196His	0.649652	0.129081	4
p.Asn196Ile	0.188781	0.0461743	7
p.Asn196Lys	0.729964	0.108103	4
p.Asn196Ser	0.881483	0.122172	9
p.Asn196Thr	0.784377	0.150082	3
p.Asn196Tyr	0.707211	0.0881774	3
p.Ile197Phe	1.02323	0.344882	6
p.Ile197Leu	0.820582	0.256247	5
p.Ile197Met	0.743615	0.297402	3
p.Ile197Asn	0.163072	0.023025	6
p.Ile197Ser	0.795231	0.154454	7
p.Ile197Thr	0.852353	0.244914	8
p.Ile197Val	0.845568	0.130328	7
p.Phe198Cys	0.00628357	0.0328552	3
p.Phe198Ile	0.615882	0.112283	6
p.Phe198Leu	0.742998	0.176093	7
p.Phe198Ser	0.0258853	0.0134056	3
p.Phe198Val	0.985578	0.278244	4
p.Phe198Tyr	0.715446	0.124888	5
p.Ala199Asp	0.0990783	0.0465971	5
p.Ala199Gly	0.926183	0.400576	4
p.Ala199Pro	0.0101582	0.0114051	4
p.Ala199Ser	0.721866	0.168376	4
p.Ala199Thr	0.891599	0.503814	4
p.Ala199Val	0.848184	0.297461	4
p.Thr200Ala	0.793514	0.11007	4
p.Thr200Lys	0.799247	0.0959359	4
p.Thr200Met	0.409823	0.149835	7
p.Thr200Pro	0.574758	0.119454	4
p.Thr200Arg	0.606371	0.0617882	9
p.Thr200Ser	0.928207	0.204283	5
p.Ser201Ala	1.11272	0.186347	6
p.Ser201Cys	0.0185864	0.0162139	7
p.Ser201Phe	0.8385	0.329775	4
p.Ser201Pro	0.881629	0.304939	4
p.Ser201Thr	0.674111	0.236503	3
p.Ser201Tyr	0.878755	0.328692	6
p.Ala202Glu	0.31134	0.152082	6
p.Ala202Gly	0.715566	0.0987194	5
p.Ala202Pro	0.548891	0.0940406	5
p.Ala202Ser	1.10759	0.272081	8
p.Ala202Thr	0.629846	0.2744	3
p.Ala202Val	0.660699	0.0593967	3
p.Leu203Met	0.745508	0.169126	4
p.Leu203Pro	0.845354	0.287697	4
p.Leu203Gln	0.669133	0.293052	4
p.Leu203Arg	0.124612	0.0373881	7
p.Leu203Val	1.01568	0.312283	7
p.Arg204Cys	1.14038	0.338877	3
p.Arg204Gly	0.976515	0.702206	3
p.Arg204His	0.289052	0.125216	5
p.Arg204Leu	0.51959	0.0985921	4
p.Arg204Pro	0.873474	0.120982	7
p.Arg204Ser	0.69891	0.0879761	4
p.Ser205Cys	0.598036	0.290431	4
p.Ser205Gly	1.14132	0.480779	4
p.Ser205Ile	0.770819	0.110569	7
p.Ser205Asn	0.940139	0.338426	5
p.Ser205Arg	0.232394	0.0938921	8
p.Ser205Thr	1.40064	0.636184	4
p.Met206Ile	0.61926	0.0813777	4
p.Met206Lys	0.249636	0.0805338	4
p.Met206Leu	0.86184	0.305107	3
p.Met206Arg	0.315919	0.0948518	5
p.Met206Thr	0.948351	0.156876	6
p.Met206Val	0.729282	0.367692	4
p.Arg207Cys	0.00515699	0.0917979	7
p.Arg207Gly	0.00632439	0.00898459	4
p.Arg207His	0.326545	0.0983935	5
p.Arg207Leu	-0.0878973	0.0338209	3
p.Arg207Pro	0.0308375	0.0324232	3
p.Arg207Ser	0.421967	0.0519866	4
p.Phe208Cys	0.83929	0.208021	7
p.Phe208Ile	1.32854	0.340313	3
p.Phe208Leu	0.961798	0.215146	8
p.Phe208Ser	0.906785	0.3981	5
p.Phe208Val	1.08968	0.314604	6
p.Phe208Tyr	0.719022	0.204535	3
p.Leu209Met	1.84167	0.314938	14
p.Leu209Pro	0.815827	0.198027	4
p.Leu209Gln	0.971323	0.178851	4
p.Leu209Arg	0.115967	0.0785146	4
p.Leu209Val	0.888107	0.146174	7
p.Gln210Glu	0.849212	0.128543	4
p.Gln210His	0.960672	0.198625	5
p.Gln210Lys	1.28096	0.221271	9
p.Gln210Leu	1.2894	0.222301	5
p.Gln210Pro	1.52468	0.154992	12
p.Gln210Arg	0.114531	0.00679767	3
p.Ile211Phe	0.536264	0.0943324	7
p.Ile211Leu	0.672439	0.143621	3
p.Ile211Met	1.10704	0.362459	6
p.Ile211Asn	0.321039	0.0697274	9
p.Ile211Ser	0.646921	0.143784	3
p.Ile211Thr	0.708942	0.0647913	3
p.Ile211Val	1.03185	0.164276	7
p.Leu212Met	1.0981	0.155133	13
p.Leu212Pro	0.318471	0.0715687	7
p.Leu212Gln	0.915902	0.139226	5
p.Leu212Arg	0.0505346	0.0278124	7
p.Leu212Val	1.45617	0.273248	9
p.Arg213Cys	0.783121	0.280469	5
p.Arg213Gly	0.575926	0.0883721	3
p.Arg213His	1.03741	0.311408	8
p.Arg213Leu	0.465466	0.183927	7
p.Arg213Pro	0.0725687	0.0256385	12
p.Arg213Ser	1.07119	0.164249	6
p.Met214Ile	1.1227	0.215558	3
p.Met214Lys	-0.00504953	0.0104925	6
p.Met214Leu	1.44336	0.171578	10
p.Met214Arg	-0.0220386	0.0129489	5
p.Met214Thr	0.844972	0.216025	6
p.Met214Val	0.999299	0.0643465	6
p.Val215Ala	0.88775	0.153051	4
p.Val215Glu	0.0204121	0.0134806	5
p.Val215Gly	1.31159	0.616975	5
p.Val215Leu	1.02454	0.304932	5
p.Val215Met	1.32692	0.451134	5
p.Arg216Cys	0.69916	0.103879	3
p.Arg216Gly	1.06995	0.13387	6
p.Arg216His	0.917479	0.226384	9
p.Arg216Leu	1.28082	0.203278	7
p.Arg216Pro	0.511482	0.068075	7
p.Arg216Ser	0.776211	0.156345	8
p.Met217Ile	1.05067	0.144817	4
p.Met217Lys	0.00960141	0.0318349	4
p.Met217Leu	1.21747	0.148187	4
p.Met217Arg	0.00912501	0.0303499	6
p.Met217Thr	0.633204	0.123472	7
p.Met217Val	0.678118	0.183072	5
p.Asp218Ala	0.495591	0.0758214	7
p.Asp218Glu	2.30976	0.295349	17
p.Asp218Gly	0.709352	0.0716297	4
p.Asp218His	0.160421	0.027706	5
p.Asp218Asn	0.404383	0.153587	7
p.Asp218Val	0.262108	0.0383539	6
p.Asp218Tyr	0.672849	0.10291	4
p.Arg219Cys	1.96955	0.35431	9
p.Arg219Gly	0.594816	0.155906	4
p.Arg219His	0.589403	0.0967592	5
p.Arg219Leu	1.63688	0.17612	8
p.Arg219Pro	4.09359	0.716991	11
p.Arg219Ser	0.756194	0.0508587	7
p.Arg220Cys	1.33255	0.522	3
p.Arg220Gly	0.789713	0.187527	6
p.Arg220His	1.11804	0.0867473	4
p.Arg220Leu	0.529793	0.131212	7
p.Arg220Pro	0.169544	0.080771	5
p.Arg220Ser	1.08532	0.196076	5
p.Gly221Ala	0.559144	0.138269	6
p.Gly221Cys	0.964041	0.438835	6
p.Gly221Asp	0.147675	0.152112	4
p.Gly221Arg	0.0374935	0.00920998	4
p.Gly221Ser	0.634071	0.277779	4
p.Gly221Val	0.245121	0.041898	6
p.Gly222Ala	0.335521	0.110284	6
p.Gly222Cys	0.116595	0.0644182	7
p.Gly222Asp	0.314883	0.0528981	11
p.Gly222Arg	0.702594	0.168326	3
p.Gly222Ser	1.00471	0.51702	3
p.Gly222Val	0.0313984	0.0177568	5
p.Thr223Ala	2.5153	0.359689	10
p.Thr223Ile	1.07323	0.2676	3
p.Thr223Asn	0.0695017	0.0477921	4
p.Thr223Pro	1.4294	0.222802	7
p.Thr223Ser	1.1151	0.067924	4
p.Trp224Cys	0.0958702	0.0108205	3
p.Trp224Gly	-0.0235967	0.0192617	4
p.Trp224Leu	0.97125	0.180474	4
p.Trp224Arg	-0.0194945	0.0139085	3
p.Trp224Ser	0.00580779	0.0320813	4
p.Lys225Glu	1.01763	0.200854	8
p.Lys225Met	0.696671	0.224769	4
p.Lys225Asn	1.2441	0.308729	6
p.Lys225Gln	0.888951	0.233314	3
p.Lys225Arg	1.12238	0.362791	3
p.Lys225Thr	1.12238	0.148149	4
p.Leu226Met	0.0662396	0.0534466	3
p.Leu226Pro	-0.0381838	0.0138617	7
p.Leu226Gln	-0.0279498	0.0095278	4
p.Leu226Arg	-0.0201055	0.0106062	9
p.Leu226Val	-0.0550577	0.0325627	7
p.Leu227Met	0.0448223	0.0179533	3
p.Leu227Pro	-0.0187087	0.0181042	7
p.Leu227Gln	0.00477524	0.0145932	5
p.Leu227Arg	-0.015213	0.00693076	7
p.Leu227Val	4.40663	0.632327	10
p.Gly228Ala	1.23383	0.3903	3
p.Gly228Cys	1.02355	0.221943	6
p.Gly228Asp	0.0470829	0.02213	9
p.Gly228Arg	0.772131	0.0905495	4
p.Gly228Ser	1.34022	0.310349	4
p.Gly228Val	1.24576	0.0632488	5
p.Ser229Ala	1.24645	0.331474	6
p.Ser229Leu	0.929398	0.301965	4
p.Ser229Pro	-0.0567866	0.0591068	6
p.Ser229Thr	0.0772766	0.0237513	5
p.Val230Ala	0.370933	0.133292	7
p.Val230Glu	-0.0260711	0.00843466	6
p.Val230Gly	-0.026361	0.0110701	8
p.Val230Leu	-0.0218875	0.00934846	5
p.Val230Met	-0.0176641	0.00287748	5
p.Val231Ala	0.157097	0.0293503	6
p.Val231Asp	-0.00447471	0.000756247	3
p.Val231Phe	0.684114	0.196215	3
p.Val231Gly	0.0215341	0.00823856	5
p.Val231Ile	1.19908	0.202347	6
p.Val231Leu	3.73963	0.403576	9
p.Tyr232Cys	1.10227	0.302791	4
p.Tyr232Asp	0.461204	0.223622	10
p.Tyr232Phe	0.739042	0.206618	4
p.Tyr232His	1.09102	0.0582082	3
p.Tyr232Asn	0.847482	0.305666	3
p.Tyr232Ser	0.666733	0.128313	13
p.Ala233Glu	0.469313	0.0774114	7
p.Ala233Gly	1.03025	0.312987	5
p.Ala233Pro	0.00877457	0.0163235	5
p.Ala233Ser	0.772444	0.17744	3
p.Ala233Thr	1.37053	0.46633	3
p.Ala233Val	1.14975	0.24561	4
p.His234Asp	0.00170597	0.00570004	4
p.His234Leu	-0.0195166	0.00517707	4
p.His234Asn	1.05213	0.356758	7
p.His234Pro	-0.0152415	0.0100402	8
p.His234Gln	0.156179	0.0394971	7
p.His234Arg	-0.0415065	0.0107176	7
p.His234Tyr	0.240189	0.1387	4
p.Ser235Cys	0.696691	0.151028	5
p.Ser235Gly	0.0835718	0.0286863	4
p.Ser235Ile	0.1355	0.0468759	5
p.Ser235Asn	0.676474	0.126047	6
p.Ser235Arg	0.604411	0.194668	4
p.Ser235Thr	0.162066	0.0430307	6
p.Lys236Glu	1.19304	0.418436	6
p.Lys236Met	0.17554	0.089878	5
p.Lys236Asn	0.119627	0.0793027	5
p.Lys236Gln	0.954076	0.145621	4
p.Lys236Arg	1.2495	0.709775	3
p.Lys236Thr	0.715072	0.3034	3
p.Glu237Ala	-0.0197481	0.0119453	6
p.Glu237Asp	0.0389632	0.0303758	6
p.Glu237Gly	-0.0121366	0.0130763	5
p.Glu237Lys	0.0285824	0.0239193	4
p.Glu237Gln	0.0424127	0.00478378	4
p.Glu237Val	-0.00562943	0.0140472	4
p.Leu238Met	0.922047	0.292388	5
p.Leu238Pro	0.00367748	0.00560966	3
p.Leu238Gln	0.0159156	0.02466	4
p.Leu238Arg	0.00392069	0.00318312	4
p.Leu238Val	0.1606	0.064838	7
p.Ile239Phe	0.657821	0.177684	4
p.Ile239Leu	0.67682	0.225702	5
p.Ile239Met	0.788557	0.254922	5
p.Ile239Asn	0.059458	0.0599305	5
p.Ile239Ser	0.654419	0.0975103	3
p.Ile239Thr	0.816349	0.13876	5
p.Ile239Val	0.852105	0.132278	5
p.Thr240Ala	0.599649	0.105168	5
p.Thr240Ile	0.356276	0.179363	6
p.Thr240Asn	0.311089	0.0822205	8
p.Thr240Pro	0.610838	0.115771	3
p.Thr240Ser	1.23364	0.452026	4
p.Ala241Asp	0.768626	0.211381	4
p.Ala241Gly	0.00219466	0.00479767	5
p.Ala241Pro	-0.00457313	0.00903811	4
p.Ala241Ser	1.12129	0.362596	6
p.Ala241Thr	0.748091	0.233189	4
p.Ala241Val	0.00725269	0.00454548	4
p.Trp242Cys	2.76101	0.491967	15
p.Trp242Gly	1.64125	0.213056	8
p.Trp242Leu	2.48356	0.43033	11
p.Trp242Arg	0.00173801	0.00104482	3
p.Trp242Ser	1.33585	0.156173	10
p.Tyr243Cys	-0.00248041	0.0153839	5
p.Tyr243Asp	0.00703028	0.0185541	3
p.Tyr243Phe	0.492559	0.120728	6
p.Tyr243His	0.864368	0.542934	4
p.Tyr243Asn	0.170109	0.095503	5
p.Tyr243Ser	0.0318837	0.00822789	5
p.Ile244Phe	0.695529	0.14052	6
p.Ile244Leu	0.857444	0.0799276	4
p.Ile244Met	0.687942	0.35628	3
p.Ile244Asn	0.0713089	0.0443154	6
p.Ile244Ser	0.150222	0.0523255	5
p.Ile244Thr	0.165021	0.062871	5
p.Ile244Val	0.249465	0.0286715	6
p.Gly245Ala	1.69757	0.157822	7
p.Gly245Glu	0.783312	0.196134	3
p.Gly245Arg	-0.000837892	0.00301422	3
p.Gly245Val	1.52601	0.255219	9
p.Gly245Trp	0.744329	0.236248	4
p.Phe246Cys	0.0551628	0.0144543	3
p.Phe246Ile	0.12794	0.0472612	4
p.Phe246Leu	0.0183384	0.00878923	5
p.Phe246Ser	0.240585	0.0591226	9
p.Phe246Val	0.799814	0.323817	3
p.Phe246Tyr	-0.00605623	0.00952728	3
p.Leu247Met	1.53622	0.333932	7
p.Leu247Pro	0.0213305	0.00267606	3
p.Leu247Gln	0.0293157	0.0206748	4
p.Leu247Arg	0.0293998	0.0105962	4
p.Leu247Val	1.6745	0.206188	8
p.Val248Ala	0.711165	0.0360173	3
p.Val248Glu	0.0192104	0.0116911	5
p.Val248Gly	0.128402	0.0291294	6
p.Val248Leu	0.502566	0.0780411	6
p.Val248Met	0.879127	0.0372524	3
p.Leu249Phe	0.0818643	0.0380638	9
p.Leu249His	-0.0160164	0.0154479	4
p.Leu249Ile	0.628751	0.25793	9
p.Leu249Pro	-0.012293	0.0102836	4
p.Leu249Arg	0.00973864	0.011447	5
p.Leu249Val	0.816392	0.195488	3
p.Ile250Phe	1.02394	0.518821	5
p.Ile250Leu	0.77026	0.128383	3
p.Ile250Met	0.688119	0.0700188	3
p.Ile250Asn	-0.0084453	0.00757693	4
p.Ile250Ser	0.0564214	0.039481	7
p.Ile250Thr	0.0380111	0.0153734	7
p.Ile250Val	0.899439	0.361863	4
p.Phe251Cys	0.933533	0.362782	4
p.Phe251Ile	1.05393	0.274773	5
p.Phe251Leu	0.957279	0.124205	5
p.Phe251Ser	1.03394	0.191265	4
p.Phe251Val	0.00296355	0.00289031	5
p.Phe251Tyr	0.825148	0.094349	3
p.Ala252Asp	0.206118	0.0763142	6
p.Ala252Gly	1.15503	0.194169	8
p.Ala252Pro	-0.0172104	0.0136411	4
p.Ala252Ser	0.602674	0.144034	4
p.Ala252Thr	0.67108	0.210794	3
p.Ala252Val	0.212516	0.0531309	7
p.Ser253Ala	0.463891	0.163908	10
p.Ser253Cys	1.03018	0.227141	7
p.Ser253Phe	-0.00309921	0.0144064	5
p.Ser253Pro	-0.0570524	0.0334641	6
p.Ser253Thr	0.699655	0.177332	3
p.Ser253Tyr	-0.00356027	0.00941881	4
p.Phe254Cys	0.0364414	0.0194541	8
p.Phe254Ile	0.079775	0.0490429	4
p.Phe254Leu	0.304997	0.0452594	6
p.Phe254Ser	0.664955	0.105162	4
p.Phe254Val	0.299106	0.0692474	9
p.Phe254Tyr	0.66144	0.199558	3
p.Leu255Met	0.830033	0.275368	4
p.Leu255Pro	0.00143797	0.00208806	4
p.Leu255Gln	-0.0491553	0.0279954	4
p.Leu255Arg	-0.0103696	0.00625189	5
p.Leu255Val	1.06807	0.344619	3
p.Val256Ala	-0.00483291	0.00509413	5
p.Val256Asp	-0.0282012	0.0145707	5
p.Val256Phe	-0.0219859	0.0182313	4
p.Val256Gly	-0.00379343	0.00748966	5
p.Val256Ile	-0.0160644	0.00824592	4
p.Val256Leu	0.737483	0.130083	7
p.Tyr257Cys	0.0228713	0.0154229	7
p.Tyr257Asp	8.72393e-05	0.0229385	5
p.Tyr257Phe	0.744263	0.111113	4
p.Tyr257His	0.721715	0.331991	4
p.Tyr257Asn	0.191607	0.060515	6
p.Tyr257Ser	0.0598352	0.0373192	4
p.Leu258Met	1.03346	0.42629	4
p.Leu258Pro	0.00321356	0.00462895	6
p.Leu258Gln	0.831211	0.0602295	6
p.Leu258Arg	-0.00199215	0.0157902	6
p.Leu258Val	0.804268	0.433044	4
p.Ala259Asp	-0.0158616	0.00987289	4
p.Ala259Gly	-0.00218542	0.00295738	5
p.Ala259Pro	0.00212627	0.00861582	5
p.Ala259Ser	0.594579	0.131662	4
p.Ala259Thr	0.381686	0.168233	8
p.Ala259Val	1.05017	0.243676	5
p.Glu260Ala	0.0102521	0.00680405	5
p.Glu260Asp	0.0135261	0.0175886	6
p.Glu260Gly	0.00780126	0.00490077	5
p.Glu260Lys	-0.00778943	0.0126531	5
p.Glu260Gln	-0.00295135	0.00660808	5
p.Glu260Val	-0.0173005	0.0168127	4
p.Lys261Glu	0.383713	0.127097	8
p.Lys261Met	0.227418	0.0686672	9
p.Lys261Asn	0.815845	0.138454	3
p.Lys261Gln	0.337663	0.0777126	8
p.Lys261Arg	0.0873122	0.0426359	7
p.Lys261Thr	0.942363	0.11083	3
p.Asp262Ala	-0.0202406	0.00829818	5
p.Asp262Glu	0.90468	0.249635	9
p.Asp262Gly	0.826068	0.310688	8
p.Asp262His	0.665641	0.0896088	8
p.Asp262Asn	1.0214	0.353164	3
p.Asp262Val	-0.00354687	0.00481858	3
p.Asp262Tyr	-0.0312808	0.0190505	5
p.Ala263Asp	0.693326	0.0845902	4
p.Ala263Gly	0.688556	0.10186	3
p.Ala263Pro	-0.00827221	0.00841383	5
p.Ala263Ser	0.943075	0.035152	3
p.Ala263Thr	1.22038	0.158719	9
p.Ala263Val	0.93327	0.246132	9
p.Asn264Asp	0.254099	0.0851017	6
p.Asn264His	0.15058	0.0565921	7
p.Asn264Ile	0.00394656	0.00737782	4
p.Asn264Lys	0.0113841	0.0100427	7
p.Asn264Ser	0.186077	0.0605873	11
p.Asn264Thr	0.115364	0.0307385	7
p.Asn264Tyr	-0.0086999	0.00717507	5
p.Ser265Ala	1.32157	0.455161	5
p.Ser265Cys	0.168809	0.0599029	7
p.Ser265Phe	0.15906	0.0859317	4
p.Ser265Pro	1.15131	0.245896	8
p.Ser265Thr	0.683875	0.130734	3
p.Ser265Tyr	0.648324	0.069642	3
p.Asp266Ala	0.20936	0.0643423	8
p.Asp266Glu	0.341668	0.113173	8
p.Asp266Gly	0.823196	0.303577	3
p.Asp266His	0.261441	0.121654	7
p.Asp266Asn	0.983131	0.381524	4
p.Asp266Val	-0.00828635	0.00465737	4
p.Asp266Tyr	-0.0179905	0.0133535	5
p.Phe267Cys	-0.012907	0.0121003	5
p.Phe267Ile	0.147998	0.0613896	8
p.Phe267Leu	0.0128537	0.0291008	5
p.Phe267Ser	-0.000496451	0.0132028	5
p.Phe267Val	0.00465326	0.0100979	5
p.Phe267Tyr	0.0148975	0.00883671	6
p.Ser268Ala	0.886091	0.256885	5
p.Ser268Cys	0.0111914	0.00752476	4
p.Ser268Phe	0.226115	0.0776069	5
p.Ser268Pro	0.760232	0.240301	6
p.Ser268Thr	0.68096	0.232523	4
p.Ser268Tyr	1.06826	0.473871	6
p.Ser269Ala	0.00783767	0.00915376	4
p.Ser269Cys	0.842141	0.234965	6
p.Ser269Phe	-0.0243503	0.0199559	8
p.Ser269Pro	0.00379177	0.00682232	4
p.Ser269Thr	0.707809	0.149696	4
p.Ser269Tyr	0.0141209	0.0180944	4
p.Tyr270Cys	0.00207748	0.0105392	5
p.Tyr270Asp	-0.0053776	0.0112118	6
p.Tyr270Phe	0.84515	0.245406	4
p.Tyr270His	-0.00343486	0.0102633	5
p.Tyr270Asn	-0.0158962	0.010663	6
p.Tyr270Ser	-0.0388954	0.0124596	4
p.Ala271Asp	-0.0239118	0.0109462	4
p.Ala271Gly	1.72737	0.305285	10
p.Ala271Pro	0.235021	0.107809	8
p.Ala271Ser	0.638423	0.119144	5
p.Ala271Thr	0.705513	0.195226	3
p.Ala271Val	0.542803	0.087061	5
p.Asp272Ala	0.283405	0.122173	8
p.Asp272Glu	0.97462	0.288439	5
p.Asp272Gly	0.0200406	0.0110817	5
p.Asp272His	0.137626	0.0516642	5
p.Asp272Asn	0.293007	0.087267	12
p.Asp272Val	-0.020309	0.00855774	6
p.Asp272Tyr	-0.0263625	0.0231002	5
p.Ser273Ala	0.633769	0.14445	6
p.Ser273Leu	0.00502319	0.00656974	4
p.Ser273Pro	-0.00382735	0.00778987	4
p.Ser273Thr	0.0854021	0.0392892	7
p.Ser273Trp	-0.0304277	0.0441714	5
p.Leu274Phe	0.011214	0.00590814	4
p.Leu274His	-0.0162361	0.0207659	5
p.Leu274Ile	0.562435	0.0612994	6
p.Leu274Pro	-0.00640211	0.0102878	5
p.Leu274Arg	-0.00436197	0.00677005	5
p.Leu274Val	0.0203354	0.0170278	4
p.Trp275Cys	-0.0306428	0.00959205	4
p.Trp275Gly	-0.0229998	0.0216207	5
p.Trp275Leu	0.00447175	0.0185927	5
p.Trp275Arg	-0.00623028	0.00577847	6
p.Trp275Ser	-0.00712747	0.0109583	4
p.Trp276Cys	-0.0210397	0.006684	3
p.Trp276Gly	0.0119551	0.003428	5
p.Trp276Leu	-0.00543952	0.00868019	3
p.Trp276Arg	-0.00300421	0.00836535	5
p.Trp276Ser	0.02193	0.0125473	4
p.Gly277Ala	0.743854	0.297492	5
p.Gly277Glu	-0.00776319	0.0053025	5
p.Gly277Arg	-0.0116442	0.00518145	5
p.Gly277Val	0.0203696	0.00556359	5
p.Gly277Trp	-0.0353088	0.0205289	4
p.Thr278Ala	0.639079	0.116796	7
p.Thr278Lys	0.0148219	0.0150223	4
p.Thr278Met	0.748506	0.263921	4
p.Thr278Pro	-0.026018	0.0128608	5
p.Thr278Arg	-0.030105	0.0190728	4
p.Thr278Ser	0.272007	0.0898844	5
p.Ile279Phe	-0.0375794	0.0180153	6
p.Ile279Leu	-4.4359e-06	0.011207	5
p.Ile279Met	0.0611869	0.0202521	5
p.Ile279Asn	-0.0150211	0.0147808	5
p.Ile279Ser	0.0251871	0.0131005	4
p.Ile279Thr	0.195737	0.104999	5
p.Ile279Val	0.00941556	0.00982235	5
p.Thr280Ala	-0.0203922	0.00202556	3
p.Thr280Ile	-0.00138576	0.0215374	4
p.Thr280Lys	0.000278722	0.00742542	5
p.Thr280Pro	-0.0308188	0.0103295	5
p.Thr280Arg	-0.0108167	0.00958357	4
p.Thr280Ser	0.599192	0.104255	5
p.Leu281Phe	0.718356	0.158805	4
p.Leu281Met	0.866946	0.0747357	7
p.Leu281Ser	-0.00906864	0.00920725	4
p.Leu281Val	0.0120996	0.0106614	5
p.Leu281Trp	0.0344055	0.034602	4
p.Thr282Ala	0.047151	0.00614437	5
p.Thr282Ile	-0.0167237	0.00741443	5
p.Thr282Lys	-0.0221671	0.00763985	7
p.Thr282Pro	-0.0170523	0.00611543	4
p.Thr282Arg	-0.0232334	0.00332036	5
p.Thr282Ser	0.258709	0.0605731	8
p.Thr283Ala	0.0191819	0.00734798	5
p.Thr283Ile	-0.0214664	0.00932794	5
p.Thr283Asn	-0.00632485	0.0064035	3
p.Thr283Pro	-0.0291098	0.0143382	5
p.Thr283Ser	-0.00640543	0.00499789	5
p.Ile284Phe	-0.00848402	0.00701006	5
p.Ile284Leu	-0.000335927	0.00562877	4
p.Ile284Met	-0.0086707	0.00802387	5
p.Ile284Asn	0.0200007	0.0267473	6
p.Ile284Ser	-0.00286744	0.00823834	5
p.Ile284Thr	-0.0035513	0.012584	5
p.Ile284Val	0.8766	0.0988976	3
p.Gly285Ala	-0.00365546	0.0096097	4
p.Gly285Cys	-0.00736682	0.00397855	4
p.Gly285Asp	-0.00652909	0.00890709	4
p.Gly285Arg	-0.00849696	0.00818042	5
p.Gly285Ser	-0.00412686	0.00370144	5
p.Gly285Val	-0.00491978	0.00311581	5
p.Tyr286Cys	0.000315133	0.00249687	4
p.Tyr286Asp	-0.0109478	0.0119564	5
p.Tyr286Phe	-0.00651744	0.00702317	5
p.Tyr286His	-0.00458746	0.00544207	3
p.Tyr286Asn	0.010015	0.00872166	4
p.Tyr286Ser	0.0111332	0.00653821	4
p.Gly287Ala	-8.9334e-05	0.00235292	3
p.Gly287Cys	-0.0176544	0.00621783	4
p.Gly287Asp	-0.00690965	0.0101447	5
p.Gly287Arg	-0.00107755	0.0107708	3
p.Gly287Ser	-0.0084977	0.0143217	5
p.Gly287Val	-0.0273658	0.0124044	3
p.Asp288Ala	0.00884222	0.0107113	4
p.Asp288Glu	-0.00645977	0.0114454	3
p.Asp288Gly	-0.0158384	0.00589872	5
p.Asp288His	-0.0077813	0.01869	4
p.Asp288Asn	-0.0126349	0.00340718	4
p.Asp288Val	-0.0158029	0.0047755	4
p.Asp288Tyr	-0.0307939	0.0157285	4
p.Lys289Glu	0.0141006	0.00345482	3
p.Lys289Met	1.09812	0.27954	4
p.Lys289Asn	0.00404406	0.0365851	4
p.Lys289Gln	0.0856747	0.0292882	6
p.Lys289Arg	0.0733376	0.0271725	5
p.Lys289Thr	0.953129	0.211941	6
p.Thr290Ala	0.191509	0.0575678	6
p.Thr290Ile	0.734332	0.21788	4
p.Thr290Lys	0.0621026	0.036811	3
p.Thr290Pro	-0.0121981	0.00703796	3
p.Thr290Arg	0.0783956	0.0451466	5
p.Thr290Ser	0.720383	0.168499	6
p.Pro291Ala	-0.00549081	0.0176424	4
p.Pro291Leu	-0.00291383	0.00662785	6
p.Pro291Gln	0.00584707	0.00812987	6
p.Pro291Arg	-0.0122246	0.0076639	5
p.Pro291Ser	0.00172168	0.00638767	4
p.Pro291Thr	-0.00482552	0.00712896	5
p.His292Asp	0.802819	0.196175	6
p.His292Leu	0.817046	0.232971	6
p.His292Asn	0.752177	0.168285	5
p.His292Pro	-0.0172431	0.0112566	5
p.His292Gln	0.910974	0.0578851	5
p.His292Arg	0.883337	0.0859326	4
p.His292Tyr	0.826129	0.318398	4
p.Thr293Ala	-0.0108971	0.00702469	4
p.Thr293Ile	-0.0222714	0.0147471	4
p.Thr293Lys	-0.00485592	0.00776347	4
p.Thr293Pro	-0.0020272	0.00828403	5
p.Thr293Arg	-0.00697914	0.00306319	3
p.Thr293Ser	-0.0158898	0.0039687	4
p.Trp294Cys	1.04989	0.374342	5
p.Trp294Gly	0.641572	0.00935593	3
p.Trp294Leu	1.07228	0.268279	4
p.Trp294Arg	0.603295	0.0736411	6
p.Trp294Ser	1.36167	0.216735	9
p.Leu295Met	0.756789	0.175763	4
p.Leu295Pro	0.512767	0.126779	7
p.Leu295Gln	-0.0372532	0.0390165	4
p.Leu295Arg	0.282023	0.0444453	4
p.Leu295Val	0.675037	0.20408	4
p.Gly296Ala	-0.00276098	0.00706222	5
p.Gly296Cys	-0.014786	0.00772705	6
p.Gly296Asp	-0.0165453	0.0135003	6
p.Gly296Arg	0.000463459	0.00958304	4
p.Gly296Ser	-0.00536651	0.00345262	4
p.Gly296Val	0.0109557	0.0154873	4
p.Arg297Gly	0.0132892	0.0244447	4
p.Arg297Lys	1.47152	0.198295	11
p.Arg297Met	0.640737	0.111423	4
p.Arg297Ser	0.0180213	0.0214584	4
p.Arg297Thr	-0.00618946	0.00325909	4
p.Arg297Trp	-0.016504	0.00247967	3
p.Val298Ala	0.966498	0.0567907	3
p.Val298Asp	-0.0143478	0.00867889	4
p.Val298Phe	0.932604	0.23341	7
p.Val298Gly	0.13517	0.0674596	3
p.Val298Ile	1.52111	0.259391	4
p.Val298Leu	1.14067	0.27765	4
p.Leu299Met	1.23951	0.387624	5
p.Leu299Pro	-0.05148	0.0123835	4
p.Leu299Gln	0.0496928	0.0408255	6
p.Leu299Arg	-0.00852894	0.0165658	4
p.Leu299Val	0.660152	0.114161	3
p.Ala300Asp	-0.0324943	0.0114091	4
p.Ala300Gly	1.31457	0.360848	5
p.Ala300Pro	-0.0196407	0.0101025	5
p.Ala300Ser	0.906052	0.170985	3
p.Ala300Thr	0.902246	0.29226	3
p.Ala300Val	0.0878801	0.0198946	7
p.Ala301Asp	0.000188156	0.00728997	5
p.Ala301Gly	0.821099	0.0819216	4
p.Ala301Pro	0.000412477	0.00657368	6
p.Ala301Ser	1.04518	0.368229	4
p.Ala301Thr	0.76874	0.189744	4
p.Ala301Val	1.47055	0.220647	9
p.Gly302Ala	1.03172	0.234268	3
p.Gly302Cys	1.18856	0.246996	4
p.Gly302Asp	-0.00950637	0.0144471	3
p.Gly302Arg	-0.0133293	0.0153584	7
p.Gly302Ser	1.41797	0.235498	6
p.Gly302Val	1.32562	0.271483	3
p.Phe303Cys	0.817422	0.176666	3
p.Phe303Ile	-0.000717876	0.0037922	5
p.Phe303Leu	0.0723583	0.0492356	5
p.Phe303Ser	0.63962	0.206924	3
p.Phe303Val	-0.00278861	0.00262699	4
p.Phe303Tyr	0.0867749	0.0253752	4
p.Ala304Asp	-0.00833533	0.0279964	4
p.Ala304Gly	0.857344	0.254798	4
p.Ala304Pro	-0.0182304	0.00935454	5
p.Ala304Ser	0.609839	0.0853325	3
p.Ala304Thr	0.0928827	0.0247883	12
p.Ala304Val	0.203619	0.0569315	5
p.Leu305Phe	1.08406	0.339089	3
p.Leu305Ile	0.663882	0.107051	3
p.Leu305Ser	-0.0240527	0.00967974	4
p.Leu305Val	0.750931	0.203405	4
p.Leu306Met	1.03547	0.41915	4
p.Leu306Pro	0.00329766	0.0241788	6
p.Leu306Gln	0.132359	0.0661352	4
p.Leu306Arg	-0.00350112	0.0149258	4
p.Leu306Val	1.24811	0.552036	5
p.Gly307Ala	-0.0114934	0.00779772	5
p.Gly307Cys	-0.0151702	0.00642126	6
p.Gly307Asp	-0.00576174	0.00529919	3
p.Gly307Arg	-0.03829	0.0115717	7
p.Gly307Ser	-0.0140149	0.00967231	8
p.Gly307Val	-0.0112247	0.00638622	5
p.Ile308Phe	1.15931	0.273389	3
p.Ile308Leu	0.337048	0.0624659	7
p.Ile308Met	0.258956	0.0954966	8
p.Ile308Asn	0.625973	0.356886	4
p.Ile308Ser	0.81952	0.282582	3
p.Ile308Thr	0.964368	0.196583	3
p.Ile308Val	1.11092	0.10561	5
p.Ser309Ala	1.44714	0.349242	3
p.Ser309Cys	0.110982	0.0267079	6
p.Ser309Phe	-0.0233328	0.00539443	4
p.Ser309Pro	1.22448	0.495234	6
p.Ser309Thr	0.0320375	0.00762011	5
p.Ser309Tyr	0.0547032	0.0381705	3
p.Phe310Cys	0.203146	0.0637807	6
p.Phe310Ile	1.39458	0.243445	10
p.Phe310Leu	0.811019	0.123158	3
p.Phe310Ser	0.590231	0.112923	4
p.Phe310Val	1.50617	0.360162	6
p.Phe310Tyr	0.0677311	0.0418366	4
p.Phe311Cys	-0.0131299	0.00832589	5
p.Phe311Ile	0.120056	0.0527347	5
p.Phe311Leu	0.785538	0.139995	3
p.Phe311Ser	-0.0221721	0.0124161	4
p.Phe311Val	0.288652	0.0958693	5
p.Phe311Tyr	0.727583	0.321834	5
p.Ala312Asp	-0.0236723	0.0119919	3
p.Ala312Gly	0.728246	0.0966761	4
p.Ala312Pro	1.11943	0.19314	4
p.Ala312Ser	1.03419	0.0681855	3
p.Ala312Thr	0.25379	0.110588	4
p.Ala312Val	-0.00779054	0.00633519	3
p.Leu313Met	0.878199	0.111847	3
p.Leu313Pro	-0.0050536	0.00785054	5
p.Leu313Gln	0.0487572	0.0187972	5
p.Leu313Arg	0.0248124	0.00715059	4
p.Leu313Val	0.838884	0.303379	3
p.Pro314Ala	-0.0191218	0.0191009	3
p.Pro314His	0.112364	0.0253112	5
p.Pro314Leu	0.00636135	0.00875945	4
p.Pro314Arg	0.0228578	0.0366827	5
p.Pro314Ser	0.0213685	0.0189571	5
p.Pro314Thr	0.0519936	0.0623466	3
p.Ala315Asp	0.0136115	0.00945512	5
p.Ala315Gly	1.13406	0.358963	3
p.Ala315Pro	0.964339	0.321832	4
p.Ala315Ser	0.870663	0.387595	3
p.Ala315Thr	1.2766	0.61464	4
p.Ala315Val	0.0437978	0.00936591	5
p.Gly316Ala	-0.00451426	0.0125757	5
p.Gly316Cys	-0.0107001	0.00436747	5
p.Gly316Asp	0.0139115	0.00834095	3
p.Gly316Arg	-0.0293239	0.0104434	5
p.Gly316Ser	0.0421004	0.0144257	3
p.Gly316Val	0.00365998	0.00740452	5
p.Ile317Phe	0.9253	0.4218	3
p.Ile317Leu	0.161196	0.0546896	5
p.Ile317Met	0.0422932	0.00806409	6
p.Ile317Asn	0.00652003	0.0187648	5
p.Ile317Ser	0.0212572	0.0140477	5
p.Ile317Thr	0.705367	0.206989	4
p.Ile317Val	1.23357	0.547677	4
p.Leu318Ile	0.0156592	0.0120864	7
p.Leu318Pro	0.0178154	0.00880436	7
p.Leu318Gln	-0.0135411	0.0165972	7
p.Leu318Arg	-0.0138949	0.0275508	7
p.Leu318Val	0.0101973	0.023438	6
p.Gly319Ala	0.493205	0.227845	7
p.Gly319Cys	0.451775	0.154726	5
p.Gly319Asp	0.0520318	0.0638541	3
p.Gly319Arg	-0.0380739	0.0117762	6
p.Gly319Ser	1.82941	0.259261	6
p.Gly319Val	0.0201815	0.00524759	8
p.Ser320Ala	-0.0607699	0.038333	4
p.Ser320Cys	0.00216004	0.00355118	3
p.Ser320Phe	0.00593363	0.00425546	3
p.Ser320Pro	0.0870616	0.0224812	6
p.Ser320Thr	1.61905	0.446405	7
p.Ser320Tyr	0.0398293	0.03962	4
p.Gly321Ala	-0.0167905	0.00367933	3
p.Gly321Cys	-0.0130452	0.0110753	3
p.Gly321Asp	-0.00766856	0.00837077	3
p.Gly321Arg	-0.0156944	0.0044454	3
p.Gly321Ser	-0.0233254	0.016612	6
p.Gly321Val	-0.0446565	0.0066159	3
p.Phe322Cys	0.00793594	0.0132185	3
p.Phe322Ile	-0.0987883	0.115304	4
p.Phe322Leu	0.975144	0.232074	5
p.Phe322Ser	-0.011221	0.0148259	3
p.Phe322Val	0.0429557	0.032946	4
p.Phe322Tyr	-0.0334805	0.0552375	7
p.Ala323Asp	-0.0110232	0.0180238	3
p.Ala323Gly	1.11778	0.372793	7
p.Ala323Pro	0.00105414	0.00503786	3
p.Ala323Ser	1.8081	0.273097	8
p.Ala323Thr	0.0394524	0.0305761	3
p.Ala323Val	0.097599	0.0931835	3
p.Leu324Met	1.13774	0.654244	3
p.Leu324Pro	-0.00272808	0.0146525	3
p.Leu324Gln	-0.0723491	0.0260799	5
p.Leu324Arg	-0.10651	0.0452264	6
p.Leu324Val	0.521873	0.137714	7
p.Lys325Glu	1.93498	0.498013	9
p.Lys325Met	0.787362	0.183875	4
p.Lys325Asn	-0.0303535	0.0199945	4
p.Lys325Gln	0.401893	0.219233	8
p.Lys325Arg	-0.00368179	0.0131161	3
p.Lys325Thr	1.50538	0.514391	11
p.Val326Ala	0.0221429	0.0168499	9
p.Val326Asp	1.01466	0.464313	4
p.Val326Phe	0.826224	0.172046	5
p.Val326Gly	0.859339	0.127685	3
p.Val326Ile	3.99906	0.832381	10
p.Val326Leu	0.904185	0.199844	4
p.Gln327Glu	1.18326	0.333405	4
p.Gln327His	0.0187435	0.0402041	4
p.Gln327Lys	1.0524	0.350532	3
p.Gln327Leu	0.0235768	0.00726002	3
p.Gln327Pro	0.267188	0.131731	7
p.Gln327Arg	1.71307	0.315253	9
p.Glu328Ala	0.195993	0.0532164	4
p.Glu328Asp	0.903952	0.230019	4
p.Glu328Gly	0.0292249	0.0338811	6
p.Glu328Lys	0.840697	0.086757	3
p.Glu328Gln	0.881865	0.301679	6
p.Glu328Val	0.0921738	0.0271527	4
p.Gln329Glu	1.25582	0.616499	3
p.Gln329His	0.0141216	0.0185783	3
p.Gln329Lys	0.022421	0.00720282	3
p.Gln329Leu	1.04564	0.384526	4
p.Gln329Pro	0.277364	0.0789896	5
p.Gln329Arg	1.21908	0.372645	4
p.His330Asp	0.927387	0.293418	5
p.His330Leu	0.965992	0.174174	3
p.His330Asn	0.407156	0.159164	6
p.His330Pro	0.00118167	0.00219852	3
p.His330Gln	0.206152	0.107356	3
p.His330Arg	0.991439	0.308874	6
p.His330Tyr	0.285861	0.0557872	5
p.Arg331Gly	-0.0209516	0.00692728	3
p.Arg331Leu	-0.0239138	0.0105635	3
p.Arg331Pro	0.173327	0.0941798	4
p.Arg331Gln	-0.0308985	0.0204364	3
p.Arg331Trp	-0.133158	0.0650839	3
p.Gln332Glu	0.93528	0.501345	4
p.Gln332His	0.149462	0.0488857	6
p.Gln332Lys	0.863105	0.171925	4
p.Gln332Leu	0.134644	0.0546654	5
p.Gln332Pro	-0.0161898	0.0100796	3
p.Gln332Arg	0.945796	0.19339	4
p.Lys333Glu	0.828411	0.216902	3
p.Lys333Met	-0.0135301	0.0182396	3
p.Lys333Asn	0.108989	0.0346036	3
p.Lys333Gln	0.172809	0.0328625	5
p.Lys333Arg	0.845234	0.235635	8
p.Lys333Thr	0.0064111	0.0179741	3
p.His334Asp	0.029786	0.0117668	7
p.His334Leu	0.00594225	0.00923727	3
p.His334Asn	-0.0179093	0.00291949	3
p.His334Pro	0.0287489	0.0273315	3
p.His334Gln	-0.00799957	0.0081676	11
p.His334Arg	-0.0073297	0.0115484	3
p.His334Tyr	1.04162	0.465849	4
p.Phe335Cys	-0.00310636	0.00613835	3
p.Phe335Ile	1.08994	0.380873	3
p.Phe335Leu	1.05655	0.579772	5
p.Phe335Ser	0.00169981	0.00800725	3
p.Phe335Val	0.0114976	0.022832	3
p.Phe335Tyr	0.0988983	0.0497549	5
p.Glu336Ala	0.0556409	0.0287	5
p.Glu336Asp	-0.00571799	0.00827225	3
p.Glu336Gly	0.0044426	0.0168477	8
p.Glu336Lys	0.00733063	0.0133638	6
p.Glu336Gln	0.200684	0.101243	4
p.Glu336Val	-0.0259352	0.0276341	4
p.Lys337Glu	0.042775	0.0161883	4
p.Lys337Met	-0.0200974	0.0401108	4
p.Lys337Asn	-0.00554524	0.0143028	5
p.Lys337Gln	0.0164559	0.00732522	3
p.Lys337Arg	-0.00735311	0.00442288	3
p.Lys337Thr	0.0128296	0.00932084	3
p.Arg338Gly	-0.046874	0.060581	4
p.Arg338Leu	0.00860518	0.0143857	4
p.Arg338Pro	-0.0432264	0.0304771	4
p.Arg338Gln	0.198333	0.0413826	8
p.Arg338Trp	-0.00894942	0.00650257	4
p.Arg339Gly	-0.000236581	0.0259613	4
p.Arg339Lys	1.00288	0.265006	4
p.Arg339Met	1.29653	0.539431	4
p.Arg339Ser	0.0705379	0.0203567	7
p.Arg339Thr	0.900292	0.256664	4
p.Arg339Trp	0.088272	0.0258683	4
p.Met340Ile	0.941475	0.191104	5
p.Met340Lys	0.969841	0.432754	3
p.Met340Leu	0.775236	0.266167	3
p.Met340Arg	0.980902	0.441031	3
p.Met340Thr	1.09067	0.426716	3
p.Met340Val	0.713592	0.348286	4
p.Pro341Ala	0.353566	0.0826705	9
p.Pro341Leu	0.88806	0.197229	3
[truncated: 2,089 more rows]

## Sheet: Supplemental_Dataset_B
Supplemental_Dataset_B: V1/2 of 3,319 KCNQ4 missense SNVs in the homozygous state
	Single expression
Variant	Normalized current (Imut/Iwt, at +40 mV)	SEM (Imut/Iwt, at +40 mV)	Δ V1/2 (mV)	SEM (ΔV1/2)
p.Met1Ile	0.284536	0.131005	-4.06177	4.80845
p.Met1Leu	0.459903	0.101142	3.31286	1.7461
p.Met1Thr	0.678475	0.271986	-3.94443	5.82383
p.Met1Val	0.350231	0.115192	2.9164	2.7673
p.Ala2Asp	0.780737	0.27596	-0.545235	3.85353
p.Ala2Gly	0.841289	0.479475	2.80161	2.14225
p.Ala2Pro	0.967476	0.54641	2.6484	3.36677
p.Ala2Ser	0.678376	0.128608	5.23967	3.08211
p.Ala2Thr	0.708685	0.144244	-0.337797	1.61745
p.Ala2Val	0.972774	0.221484	-1.28338	3.75977
p.Glu3Ala	1.00757	0.49584	-2.47569	3.59109
p.Glu3Asp	0.859324	0.440413	-0.00900585	2.37578
p.Glu3Gly	0.824448	0.205011	5.63569	0.324439
p.Glu3Lys	1.01158	0.214828	-0.560535	4.86827
p.Glu3Gln	0.740024	0.178695	-3.30084	5.01018
p.Glu3Val	0.887516	0.114022	-7.37213	1.80946
p.Ala4Asp	0.921062	0.11042	3.41421	1.13284
p.Ala4Gly	0.756021	0.0397057	-5.11321	6.43375
p.Ala4Pro	1.18068	0.292592	-0.233854	2.73323
p.Ala4Ser	1.34612	0.470261	-3.82681	0.716086
p.Ala4Thr	0.749054	0.202867	-7.28519	3.03254
p.Ala4Val	1.04997	0.321081	4.2515	2.15598
p.Pro5Ala	0.736879	0.110259	-3.88798	1.67315
p.Pro5His	0.969885	0.271751	-5.76325	2.35416
p.Pro5Leu	1.16008	0.209679	-0.609573	3.2962
p.Pro5Arg	1.05565	0.121017	5.46573	4.36129
p.Pro5Ser	0.642859	0.0930058	0.176421	0.806012
p.Pro5Thr	0.857691	0.339212	2.80259	2.49014
p.Pro6Ala	1.13391	0.0612294	-1.86152	1.73786
p.Pro6Leu	0.71987	0.291486	0.66573	4.95838
p.Pro6Gln	1.13161	0.109322	8.82711	1.92494
p.Pro6Arg	0.747754	0.127857	0.289067	3.77527
p.Pro6Ser	0.893376	0.20478	-1.40736	2.20168
p.Pro6Thr	0.956366	0.434761	5.16228	0.370643
p.Arg7Cys	0.972882	0.480407	4.61496	2.21914
p.Arg7Gly	0.644201	0.158907	-0.429185	2.82506
p.Arg7His	0.83901	0.184422	4.82049	4.4163
p.Arg7Leu	1.17677	0.234263	-3.61349	3.32025
p.Arg7Pro	0.686041	0.262858	-5.04165	2.63893
p.Arg7Ser	0.849972	0.128563	6.8832	2.07239
p.Arg8Cys	0.902723	0.329662	-3.02722	3.29746
p.Arg8Gly	1.38631	0.492979	1.39205	1.39987
p.Arg8His	0.605743	0.144895	-3.91429	0.960074
p.Arg8Leu	1.15601	0.241227	2.40219	3.45771
p.Arg8Pro	0.919917	0.27467	4.41364	4.20857
p.Arg8Ser	0.855056	0.278933	4.11794	1.85657
p.Leu9Phe	0.74393	0.128605	5.16188	2.04566
p.Leu9His	0.717266	0.311717	-1.31675	0.919932
p.Leu9Ile	1.18369	0.164596	-1.77793	4.4554
p.Leu9Pro	0.698488	0.136168	0.66844	1.71393
p.Leu9Arg	0.318021	0.0561327	2.15385	3.62311
p.Leu9Val	0.922583	0.250513	1.17213	3.12591
p.Gly10Ala	0.805089	0.350638	8.77676	2.18333
p.Gly10Cys	0.877947	0.161223	0.983979	2.00477
p.Gly10Asp	0.615522	0.257347	-1.05311	3.51475
p.Gly10Arg	0.962499	0.209728	-2.73191	1.93529
p.Gly10Ser	1.15748	0.241119	-1.77949	8.47618
p.Gly10Val	1.44775	0.239449	4.28224	1.44873
p.Leu11Met	1.49357	0.304372	7.08517	1.74944
p.Leu11Pro	0.80775	0.267592	-1.02562	6.24314
p.Leu11Gln	0.658887	0.0512877	3.77	2.57604
p.Leu11Arg	0.977976	0.332037	-1.22749	2.18334
p.Leu11Val	0.752981	0.141303	4.13641	3.58644
p.Gly12Ala	0.612595	0.109982	2.07188	2.58458
p.Gly12Cys	0.625154	0.162623	2.7694	3.44328
p.Gly12Asp	0.791859	0.188343	-0.639099	2.96744
p.Gly12Arg	0.65258	0.174066	-1.4879	3.21379
p.Gly12Ser	0.894531	0.19121	0.157407	2.99261
p.Gly12Val	1.24698	0.100668	-6.25264	3.57874
p.Pro13Ala	0.926248	0.34171	6.40996	2.39032
p.Pro13His	0.947645	0.291766	4.37038	1.75995
p.Pro13Leu	0.867973	0.320474	6.88468	2.56071
p.Pro13Arg	0.456723	0.0435291	-0.987628	2.7183
p.Pro13Ser	0.882583	0.242859	2.42755	3.39656
p.Pro13Thr	0.657247	0.126612	3.57419	3.60537
p.Pro14Ala	0.815321	0.194655	0.907319	3.13206
p.Pro14Leu	1.23223	0.620597	-1.06079	5.50209
p.Pro14Gln	0.821125	0.159166	0.521586	0.833136
p.Pro14Arg	1.59266	0.456857	3.88707	1.87596
p.Pro14Ser	1.49195	0.387929	3.7227	1.27003
p.Pro14Thr	1.06664	0.243775	4.65201	1.45687
p.Pro15Ala	1.51423	0.817551	5.8405	1.91616
p.Pro15His	0.89255	0.195051	1.19592	4.46399
p.Pro15Leu	0.748394	0.109088	6.35209	1.23111
p.Pro15Arg	0.961139	0.284931	0.542619	1.71178
p.Pro15Ser	1.18503	0.426537	6.04893	2.22164
p.Pro15Thr	1.46194	0.42037	1.11923	3.12863
p.Gly16Ala	1.08527	0.263026	3.82145	1.87167
p.Gly16Glu	0.880441	0.263894	6.1792	1.7303
p.Gly16Arg	0.728452	0.262032	4.95107	2.85096
p.Gly16Val	0.910475	0.211421	7.21902	2.54185
p.Gly16Trp	0.78395	0.145991	1.94888	1.86279
p.Asp17Ala	1.28742	0.296122	-1.65635	1.9098
p.Asp17Glu	0.880112	0.210228	2.6633	3.1126
p.Asp17Gly	1.31371	0.178259	2.95636	2.61584
p.Asp17His	0.769222	0.0956037	-8.2237	1.52088
p.Asp17Asn	1.01077	0.131209	-2.76866	2.5028
p.Asp17Val	0.931485	0.214925	0.732341	1.29339
p.Asp17Tyr	0.59758	0.0970447	0.00283116	2.66052
p.Ala18Asp	0.719043	0.241756	1.57168	0.229706
p.Ala18Gly	0.996656	0.395455	2.5609	2.71108
p.Ala18Pro	0.96184	0.331285	4.07544	3.42726
p.Ala18Ser	0.963538	0.307461	3.76519	1.09776
p.Ala18Thr	0.684755	0.143973	5.2098	3.10765
p.Ala18Val	1.51309	0.467692	0.616307	3.07095
p.Pro19Ala	1.0267	0.335796	-3.75181	4.97711
p.Pro19His	1.02324	0.284034	4.63549	3.08093
p.Pro19Leu	1.00108	0.487406	-6.60073	2.91349
p.Pro19Arg	0.854355	0.309608	-2.84796	1.79513
p.Pro19Ser	0.954453	0.227922	-4.92041	3.2684
p.Pro19Thr	0.666156	0.107945	-5.74086	1.38133
p.Arg20Cys	1.5963	0.280955	2.79196	1.97493
p.Arg20Gly	1.2771	0.294507	-1.45381	2.08556
p.Arg20His	0.844079	0.340113	-0.262363	2.75181
p.Arg20Leu	0.978203	0.331615	4.31512	2.51118
p.Arg20Pro	0.81991	0.304813	2.85863	1.31252
p.Ala21Glu	0.569415	0.0515932	1.8573	7.58987
p.Ala21Gly	0.635889	0.119396	1.04251	3.08419
p.Ala21Pro	1.34962	0.237084	-2.3743	1.8168
p.Ala21Ser	0.853186	0.105775	2.81462	4.44391
p.Ala21Thr	0.671522	0.223798	-1.2774	4.24952
p.Ala21Val	0.811814	0.236066	-3.97822	4.07143
p.Glu22Ala	0.757492	0.25174	3.72714	1.38059
p.Glu22Asp	0.908143	0.201357	5.71527	2.80065
p.Glu22Gly	0.295546	0.0904643	3.2142	0.991036
p.Glu22Lys	0.823778	0.357798	-4.31679	0.155406
p.Glu22Gln	0.619317	0.179198	7.37989	3.17286
p.Glu22Val	0.819232	0.267512	-0.0794173	2.05622
p.Leu23Ile	0.576937	0.0597113	4.41813	2.27407
p.Leu23Pro	1.18753	0.374447	-0.0720409	3.45736
p.Leu23Gln	1.22208	0.3791	-0.462736	4.75459
p.Leu23Arg	0.915261	0.271007	-1.43628	3.2168
p.Leu23Val	0.784604	0.248757	2.1068	2.8025
p.Val24Ala	0.850366	0.239276	0.984837	1.88773
p.Val24Glu	0.73607	0.185369	2.82748	3.50022
p.Val24Gly	0.565375	0.0865259	1.51562	3.19866
p.Val24Leu	0.964699	0.264232	-0.841384	2.52809
p.Val24Met	0.711928	0.0574457	3.08078	1.70651
p.Ala25Glu	0.902115	0.313242	3.38064	1.38778
p.Ala25Gly	1.26782	0.383617	-3.23587	3.95565
p.Ala25Pro	0.932535	0.42972	7.93795	0.55176
p.Ala25Ser	0.777424	0.237503	1.66233	1.73891
p.Ala25Thr	0.61546	0.198683	6.61286	2.8938
p.Ala25Val	0.581982	0.127762	3.4074	3.67489
p.Leu26Phe	0.825073	0.167299	0.415108	2.72267
p.Leu26His	1.47222	0.290098	-6.0644	2.78829
p.Leu26Ile	1.09737	0.286663	3.34593	1.88766
p.Leu26Pro	0.649253	0.123604	1.60689	2.47984
p.Leu26Arg	0.733682	0.154726	1.44426	5.33529
p.Leu26Val	0.911713	0.232365	2.62341	1.81345
p.Thr27Ala	1.01157	0.514039	6.53702	1.44823
p.Thr27Lys	0.964421	0.345632	1.07299	1.78023
p.Thr27Met	0.837129	0.265442	3.10834	3.68905
p.Thr27Pro	0.681803	0.133133	-0.0801999	2.23981
p.Thr27Arg	1.02822	0.260434	5.31248	3.74271
p.Thr27Ser	0.794716	0.225623	2.67426	1.94949
p.Ala28Asp	0.456286	0.0572679	0.589146	3.19248
p.Ala28Gly	0.644421	0.275987	1.27772	2.26723
p.Ala28Pro	1.04508	0.164463	-0.873114	3.87793
p.Ala28Ser	0.782908	0.193131	-0.75135	4.25523
p.Ala28Thr	0.80332	0.230756	-3.50034	4.28459
p.Ala28Val	0.940382	0.0834636	3.73492	1.69277
p.Val29Ala	0.774388	0.25652	-0.948252	3.59632
p.Val29Glu	1.17392	0.37581	5.03372	3.29441
p.Val29Gly	0.75616	0.199668	1.78007	2.43922
p.Val29Leu	0.8422	0.246199	0.852502	2.77701
p.Val29Met	0.781856	0.331004	2.87123	3.92994
p.Gln30Glu	0.852373	0.0459205	5.81052	1.40604
p.Gln30His	0.87237	0.267481	6.78064	3.37748
p.Gln30Lys	1.06669	0.363815	8.21161	0.897603
p.Gln30Leu	0.799652	0.233643	-7.72065	0.207947
p.Gln30Pro	0.650596	0.182159	1.72402	2.24495
p.Gln30Arg	0.826926	0.423581	4.57686	2.28125
p.Ser31Cys	1.14146	0.222233	-5.61336	2.02169
p.Ser31Gly	1.71727	0.274621	2.10974	2.04343
p.Ser31Ile	0.733119	0.147376	7.8782	1.3685
p.Ser31Asn	0.932758	0.174972	2.52932	0.89328
p.Ser31Arg	0.663556	0.140558	-0.210796	6.69651
p.Ser31Thr	0.665464	0.119354	2.85795	2.43324
p.Glu32Ala	0.836391	0.377927	-3.59769	0.513219
p.Glu32Asp	0.840554	0.0918901	1.12595	1.40272
p.Glu32Gly	0.972317	0.310699	4.06799	1.58507
p.Glu32Lys	0.822569	0.227051	2.20439	3.48565
p.Glu32Gln	0.755337	0.144958	3.81029	2.38389
p.Glu32Val	0.903434	0.289078	3.00637	2.3691
p.Gln33Glu	1.17048	0.298041	-4.08581	2.91274
p.Gln33His	0.731447	0.115155	-3.69424	2.70012
p.Gln33Lys	1.1889	0.461686	6.79344	1.11461
p.Gln33Leu	0.957274	0.293065	0.995283	1.26389
p.Gln33Pro	0.665818	0.135225	6.14468	3.17861
p.Gln33Arg	1.04025	0.280537	-2.61481	0.61153
p.Gly34Ala	0.794082	0.316	0.395056	3.26758
p.Gly34Cys	1.24272	0.400621	2.10343	2.18371
p.Gly34Asp	0.846345	0.256424	-2.26738	4.67752
p.Gly34Arg	1.35635	0.177877	4.70811	3.89486
p.Gly34Ser	0.841796	0.133385	-5.30016	3.44697
p.Gly34Val	0.497414	0.125721	-2.43478	2.45288
p.Glu35Ala	0.697223	0.205803	4.15425	2.86041
p.Glu35Asp	1.13154	0.480186	-0.0273031	1.44459
p.Glu35Gly	1.17427	0.369938	-4.2736	3.03599
p.Glu35Lys	0.674297	0.26935	1.19559	5.54714
p.Glu35Gln	0.983649	0.229666	0.323187	2.49046
p.Glu35Val	0.714268	0.298292	2.35929	2.42337
p.Ala36Glu	0.885011	0.243363	-0.204053	3.14292
p.Ala36Gly	0.955448	0.256194	5.38936	1.89748
p.Ala36Pro	0.791773	0.322921	2.21275	3.10283
p.Ala36Ser	1.3252	0.430708	2.16222	4.161
p.Ala36Thr	0.901072	0.408785	-1.21719	3.54806
p.Ala36Val	1.62057	0.37879	2.37008	2.90112
p.Gly37Ala	1.07843	0.259124	-0.434055	2.59479
p.Gly37Cys	0.940022	0.312198	3.23709	1.29919
p.Gly37Asp	0.912041	0.258484	-1.95328	1.5958
p.Gly37Arg	1.08109	0.367985	-2.00104	3.7773
p.Gly37Ser	0.776148	0.158899	-1.65346	1.47573
p.Gly37Val	1.05814	0.0552277	-2.88022	0.49629
p.Gly38Ala	0.951921	0.240019	2.37858	3.33302
p.Gly38Glu	0.659805	0.0704952	-1.90364	4.57501
p.Gly38Arg	0.81094	0.0910208	-0.865593	1.54814
p.Gly38Val	0.696376	0.109309	-1.71324	2.95794
p.Gly38Trp	0.454598	0.0685067	0.00223159	3.60395
p.Gly39Ala	0.753652	0.136408	1.70261	2.50555
p.Gly39Cys	0.818313	0.107958	-4.69736	2.51002
p.Gly39Asp	0.785867	0.081298	5.75395	3.04798
p.Gly39Arg	0.63997	0.17096	3.18102	3.47922
p.Gly39Ser	1.07725	0.560762	5.87023	2.34462
p.Gly39Val	0.64169	0.138712	8.99501	2.67428
p.Gly40Ala	1.18438	0.506627	5.36774	3.48654
p.Gly40Cys	0.859952	0.237491	1.48193	3.53334
p.Gly40Asp	0.782494	0.401665	-0.126165	3.08298
p.Gly40Arg	0.893557	0.341795	-0.43147	4.67552
p.Gly40Ser	0.804823	0.0420931	0.92803	1.99474
p.Gly40Val	0.713239	0.161049	-1.99968	1.95068
p.Ser41Ala	0.908737	0.108615	4.86551	1.99138
p.Ser41Cys	0.776781	0.294119	6.24186	3.79895
p.Ser41Pro	0.753659	0.131382	1.84037	0.875675
p.Ser41Thr	0.91358	0.206478	5.59909	0.156156
p.Ser41Tyr	0.903474	0.302241	3.50403	2.56963
p.Pro42Ala	0.66469	0.167795	2.58327	3.77032
p.Pro42Leu	0.738616	0.163923	3.46204	4.1081
p.Pro42Gln	0.914543	0.216929	-0.0411973	4.45925
p.Pro42Arg	0.708508	0.116118	0.371063	3.79965
p.Pro42Ser	0.821173	0.110574	0.0313849	3.48024
p.Pro42Thr	1.13173	0.43522	-1.92116	5.12869
p.Arg43Cys	0.681389	0.105513	0.631674	3.61946
p.Arg43Gly	0.910487	0.119793	1.84968	6.54716
p.Arg43His	1.56023	0.215939	-2.7192	4.00317
p.Arg43Leu	0.846684	0.0250412	-1.79464	3.44815
p.Arg43Pro	0.883995	0.201856	2.9187	1.89136
p.Arg44Cys	0.850816	0.394471	-3.57193	3.62052
p.Arg44Gly	0.931157	0.282706	4.23571	1.45087
p.Arg44His	0.902681	0.236208	1.20841	2.15757
p.Arg44Leu	1.14874	0.399558	-6.75247	2.13842
p.Arg44Pro	0.692555	0.158021	-3.60494	3.46534
p.Arg44Ser	0.676076	0.174902	-1.1759	6.5893
p.Leu45Phe	1.30271	0.311706	-0.980756	2.28741
p.Leu45His	0.868549	0.156456	0.120396	3.2277
p.Leu45Ile	0.996359	0.308923	-4.41551	2.1395
p.Leu45Pro	0.862324	0.353157	3.9162	1.9892
p.Leu45Arg	1.12894	0.387986	-2.67403	1.80785
p.Leu45Val	0.991716	0.267298	-5.11105	1.78199
p.Gly46Ala	1.08454	0.17971	1.70645	1.59157
p.Gly46Cys	0.660662	0.210358	2.94277	2.82744
p.Gly46Asp	0.71844	0.227347	8.99507	1.30108
p.Gly46Arg	0.885704	0.310364	2.71944	3.70587
p.Gly46Ser	0.838998	0.28232	-2.01221	2.30541
p.Gly46Val	1.2071	0.0508077	1.31182	0.527654
p.Leu47Phe	0.348387	0.0504171	2.35166	4.21456
p.Leu47His	0.921702	0.191914	-2.67507	2.32955
p.Leu47Ile	0.724352	0.225046	-0.587288	3.11877
p.Leu47Pro	0.768786	0.1565	5.27704	1.42469
p.Leu47Arg	1.01934	0.304486	-2.16897	3.81839
p.Leu47Val	0.878898	0.349808	-3.25224	2.86408
p.Leu48Met	0.802493	0.194481	-3.33608	2.25082
p.Leu48Gln	0.997388	0.110771	-6.40671	3.80222
p.Leu48Arg	0.928552	0.139449	-6.40673	3.80201
p.Leu48Val	0.663853	0.293101	-1.4245	4.3124
p.Gly49Ala	0.716704	0.188917	3.08971	2.80287
p.Gly49Cys	0.932206	0.201446	-1.49565	2.71846
p.Gly49Asp	0.651945	0.228765	6.96101	2.24886
p.Gly49Arg	0.97345	0.303257	2.0175	3.26839
p.Gly49Ser	0.43052	0.107009	2.28981	2.65627
p.Gly49Val	0.329123	0.104889	0.933496	3.6558
p.Ser50Gly	0.81624	0.286589	-5.89332	3.07819
p.Ser50Ile	1.0986	0.35025	2.33958	5.05369
p.Ser50Asn	0.825035	0.389543	-1.40834	4.59264
p.Ser50Arg	1.23888	0.108615	-1.58019	1.71876
p.Ser50Thr	0.916949	0.258392	3.99805	2.19004
p.Pro51Ala	0.973994	0.234923	3.28015	3.26654
p.Pro51His	0.792246	0.231299	-1.10984	2.96508
p.Pro51Leu	1.0437	0.346067	-1.7841	5.72851
p.Pro51Arg	1.06653	0.319384	0.246543	4.9437
p.Pro51Ser	1.22605	0.261993	-3.25843	6.21358
p.Pro51Thr	0.335674	0.0872978	-5.97377	2.47182
p.Leu52Met	1.31033	0.290963	-1.31642	0.719948
p.Leu52Pro	0.819836	0.153923	-2.11421	4.09943
p.Leu52Gln	0.932986	0.533455	0.353274	2.62474
p.Leu52Arg	1.08172	0.465316	-7.39033	4.67473
p.Leu52Val	1.14238	0.319726	2.95885	1.4365
p.Pro53Ala	1.26055	0.17465	1.18387	3.93032
p.Pro53Leu	1.16453	0.400025	-0.034474	3.44635
p.Pro53Gln	1.29964	0.492705	4.20671	1.35065
p.Pro53Arg	1.52367	0.256417	6.43245	1.95773
p.Pro53Ser	1.1502	0.323322	-0.745705	3.60085
p.Pro53Thr	0.937621	0.362662	5.92099	1.29816
p.Pro54Ala	0.737825	0.217799	-0.258122	2.28616
p.Pro54Leu	1.13358	0.425566	-0.352411	2.56446
p.Pro54Gln	1.15282	0.396723	4.70344	1.01174
p.Pro54Arg	1.12318	0.181033	2.48918	2.26359
p.Pro54Ser	1.30083	0.315595	6.57573	2.57415
p.Pro54Thr	1.07584	0.314873	2.04323	3.36632
p.Gly55Ala	1.18839	0.340308	5.88408	1.31632
p.Gly55Cys	1.4166	0.283967	5.83413	2.63072
p.Gly55Asp	1.74622	0.215848	2.94821	1.59743
p.Gly55Arg	1.12236	0.273945	1.4399	1.85152
p.Gly55Ser	1.30708	0.368736	6.77854	2.23094
p.Gly55Val	1.07134	0.182978	3.43306	3.3044
p.Ala56Glu	1.17532	0.222132	-0.94624	2.34698
p.Ala56Gly	0.721695	0.106216	-5.05811	0.301081
p.Ala56Pro	0.63301	0.22401	-0.856889	2.96093
p.Ala56Ser	0.855816	0.205911	-0.843302	2.78759
p.Ala56Thr	1.07638	0.131166	5.30701	2.84833
p.Ala56Val	1.19512	0.312415	-2.92771	3.45436
p.Pro57Ala	1.49054	0.238127	-0.124028	1.51675
p.Pro57His	1.57736	0.182235	4.34387	1.86435
p.Pro57Leu	1.39428	0.233596	6.52828	2.07618
p.Pro57Arg	1.56972	0.252168	4.54372	1.69902
p.Pro57Ser	1.50631	0.167675	-1.49373	1.7127
p.Pro57Thr	0.965141	0.261549	5.19009	1.9471
p.Leu58Phe	1.22348	0.35281	1.54131	3.9497
p.Leu58His	0.931622	0.191015	-0.179765	2.45648
p.Leu58Ile	1.78449	0.177536	2.62657	1.25879
p.Leu58Pro	1.52915	0.463266	-1.69514	3.36428
p.Leu58Arg	1.24332	0.321856	3.05741	3.17329
p.Leu58Val	1.14998	0.246487	2.20481	3.81616
p.Pro59Ala	0.920325	0.323889	-1.50947	4.0397
p.Pro59His	0.948184	0.115342	-1.18148	3.43575
p.Pro59Leu	1.16407	0.270965	4.06627	0.356793
p.Pro59Arg	0.929612	0.300966	-0.553034	4.50245
p.Pro59Ser	0.897848	0.228998	-1.69099	1.50354
p.Pro59Thr	1.18874	0.371693	-0.618931	3.12899
p.Gly60Ala	0.983686	0.275547	-0.174981	0.8522
p.Gly60Glu	0.770816	0.127381	-5.76189	2.96882
p.Gly60Arg	1.07705	0.316158	-0.924019	2.12944
p.Gly60Val	0.671119	0.113681	-2.56655	3.55585
p.Gly60Trp	1.22655	0.234768	0.0227076	2.46724
p.Pro61Ala	0.77442	0.136498	3.27294	2.1925
p.Pro61Leu	1.0936	0.162966	3.04538	3.50778
p.Pro61Gln	0.712089	0.185149	0.842274	3.03884
p.Pro61Arg	0.798654	0.214688	0.541958	4.18276
p.Pro61Ser	1.11519	0.338095	-8.36492	1.07075
p.Pro61Thr	0.982093	0.274009	-3.35209	2.13584
p.Gly62Ala	1.2354	0.308871	-7.06155	5.44631
p.Gly62Cys	1.11586	0.157359	-6.41555	4.05774
p.Gly62Asp	1.23841	0.429953	0.610057	2.92853
p.Gly62Arg	0.927443	0.262911	-0.430169	1.42297
p.Gly62Ser	0.868041	0.260729	5.00089	2.90519
p.Gly62Val	1.00663	0.174756	0.334077	4.61718
p.Ser63Ala	0.767863	0.205426	-8.82742	5.47743
p.Ser63Cys	1.45706	0.389945	2.02929	3.94237
p.Ser63Phe	1.07951	0.228369	2.73757	4.04914
p.Ser63Pro	0.927895	0.0652386	-5.67223	3.00123
p.Ser63Thr	1.01561	0.264515	-3.58628	3.30971
p.Ser63Tyr	1.07453	0.197477	-9.204	2.19394
p.Gly64Ala	1.27971	0.367092	-2.15271	2.31429
p.Gly64Cys	1.11057	0.259075	-5.2624	2.62129
p.Gly64Asp	0.911838	0.204635	-0.313775	7.06677
p.Gly64Ser	1.07574	0.285013	-7.78109	3.18493
p.Gly64Val	0.931893	0.428325	-0.545044	2.40499
p.Ser65Ala	0.996835	0.296897	1.87154	2.67132
p.Ser65Leu	0.946167	0.123635	0.0544823	3.90703
p.Ser65Pro	1.12023	0.36373	0.948572	2.62897
p.Ser65Thr	1.08175	0.474219	-8.39869	6.28359
p.Ser65Trp	0.987614	0.36577	7.30558	3.8198
p.Gly66Ala	0.901567	0.246296	4.85308	4.12936
p.Gly66Cys	0.852203	0.19674	-11.3186	2.13846
p.Gly66Asp	1.12792	0.343444	-0.668514	6.28958
p.Gly66Arg	0.978153	0.232568	-3.42088	3.3555
p.Gly66Ser	0.766188	0.205168	-1.74568	2.79438
p.Gly66Val	1.30509	0.502753	6.80717	2.73605
p.Ser67Ala	1.06609	0.395808	3.22966	2.45209
p.Ser67Cys	0.936371	0.27133	3.70806	4.75103
p.Ser67Phe	1.33912	0.327011	-3.51225	4.00415
p.Ser67Pro	1.12558	0.184862	5.93832	1.57423
p.Ser67Thr	0.930783	0.37436	-2.73901	3.74878
p.Ser67Tyr	0.809142	0.314306	0.729349	2.629
p.Ala68Asp	1.15211	0.276242	0.304032	1.59039
p.Ala68Gly	0.860051	0.398913	5.30348	1.62816
p.Ala68Pro	0.810075	0.176715	-0.131939	2.54899
p.Ala68Ser	0.918319	0.229569	-7.94107	2.44493
p.Ala68Thr	1.07063	0.322878	-8.89246	1.27394
p.Ala68Val	0.733647	0.110496	-0.643481	4.04665
p.Cys69Phe	0.914846	0.265164	0.0718453	6.56028
p.Cys69Gly	0.645022	0.116365	3.20367	1.33433
p.Cys69Arg	1.21222	0.165444	3.07065	2.8188
p.Cys69Ser	1.07322	0.230654	4.2975	3.78978
p.Cys69Trp	0.762548	0.141495	-4.65436	3.11231
p.Cys69Tyr	1.3482	0.440998	1.14753	0.686833
p.Gly70Ala	1.36016	0.414852	-0.181904	2.58321
p.Gly70Cys	1.02956	0.352875	2.01026	2.11403
p.Gly70Asp	0.919816	0.319672	3.65891	2.25381
p.Gly70Arg	1.02798	0.0562668	9.23472	0.994957
p.Gly70Ser	0.978417	0.161336	-1.13942	2.92994
p.Gly70Val	0.745824	0.414883	-2.52186	0.664696
p.Gln71Glu	1.09399	0.339664	2.14674	0.890111
p.Gln71His	0.889311	0.205859	0.916531	3.21711
p.Gln71Lys	0.908395	0.129807	1.00771	3.40497
p.Gln71Leu	0.80508	0.192312	-2.11077	6.34195
p.Gln71Pro	1.45659	0.251042	-0.572753	1.91468
p.Gln71Arg	1.40337	0.186387	2.32214	1.59798
p.Arg72Cys	2.49907	0.521053	-0.640513	1.47134
p.Arg72Gly	0.767782	0.266119	-2.7619	2.89041
p.Arg72His	0.789099	0.289617	3.57088	2.38667
p.Arg72Leu	1.19904	0.300622	-2.43995	1.08721
p.Arg72Pro	0.860908	0.112124	2.85473	1.75597
p.Arg72Ser	0.503168	0.137525	-1.86164	3.366
p.Ser73Ala	0.992004	0.233298	3.24613	1.10253
p.Ser73Cys	1.19017	0.366517	-0.361079	1.56794
p.Ser73Phe	1.10907	0.284024	1.58212	2.39095
p.Ser73Pro	1.06161	0.308131	-1.22396	2.7828
p.Ser73Thr	1.01391	0.255211	5.92892	2.80572
p.Ser73Tyr	1.02939	0.109898	4.93015	5.36493
p.Ser74Ala	1.02129	0.392956	-3.20557	1.74433
p.Ser74Leu	1.61285	0.165459	-3.87101	1.79172
p.Ser74Pro	1.18952	0.275382	3.85835	3.4772
p.Ser74Thr	0.926501	0.089573	2.97798	3.07684
p.Ser74Trp	1.10751	0.362752	0.554112	2.92081
p.Ala75Asp	1.23505	0.258719	0.208949	2.32201
p.Ala75Gly	1.20404	0.438845	2.44361	2.27357
p.Ala75Pro	1.28113	0.345133	-1.00109	1.51434
p.Ala75Ser	1.23692	0.317713	-2.55933	4.11106
p.Ala75Thr	1.28406	0.0684796	-1.41233	3.0371
p.Ala75Val	1.0728	0.181413	-4.4893	2.46185
p.Ala76Glu	1.16105	0.273335	-6.48189	0.825895
p.Ala76Gly	0.939693	0.383558	2.78347	2.79319
p.Ala76Pro	1.11885	0.12932	-5.90608	4.13232
p.Ala76Ser	0.853917	0.201058	-4.54401	3.98345
p.Ala76Thr	1.15157	0.165443	-4.21703	0.599264
p.Ala76Val	1.17425	0.281301	1.99546	2.20993
p.His77Asp	1.33416	0.245081	-2.57615	2.07906
p.His77Leu	1.06359	0.211786	0.969593	1.88415
p.His77Asn	1.16688	0.46695	-0.523047	1.17337
p.His77Pro	0.873668	0.196711	-9.57749	1.6582
p.His77Gln	0.871203	0.240886	-8.12414	2.60178
p.His77Arg	0.817046	0.130773	4.27611	3.85362
p.His77Tyr	0.800656	0.116411	-2.68981	4.34136
p.Lys78Glu	3.49738	0.713852	-12.674	1.40146
p.Lys78Met	0.866376	0.0729602	-6.15077	3.82303
p.Lys78Asn	1.40257	0.356615	-5.00737	2.73546
p.Lys78Gln	1.06751	0.347513	-4.72966	1.58578
p.Lys78Arg	1.07269	0.376911	3.15362	3.66887
p.Lys78Thr	1.14169	0.575801	-8.13063	3.35818
p.Arg79Cys	0.815069	0.358634	4.93926	1.38157
p.Arg79Gly	1.27288	0.216746	-3.04674	0.661943
p.Arg79His	1.10907	0.473601	-4.25989	1.5528
p.Arg79Leu	0.944978	0.314402	-9.32649	4.09721
p.Arg79Pro	1.00307	0.38467	-2.62019	0.532995
p.Arg79Ser	1.08525	0.555118	-7.32702	2.19123
p.Tyr80Cys	0.83007	0.260393	-5.7081	1.56318
p.Tyr80Asp	1.07092	0.184213	4.20104	3.05788
p.Tyr80Phe	0.996105	0.157017	-5.07548	0.295057
p.Tyr80His	0.766429	0.326491	0.214311	2.39405
p.Tyr80Asn	0.363449	0.106987	-1.7108	1.80423
p.Tyr80Ser	1.14093	0.106465	-8.94098	3.01802
p.Arg81Cys	0.966538	0.170852	-1.33666	2.28678
p.Arg81Gly	1.17583	0.305391	-7.76388	4.19431
p.Arg81His	0.901078	0.362575	-2.37132	3.55954
p.Arg81Leu	1.41763	0.512668	-1.0319	5.50013
p.Arg81Pro	1.23337	0.241385	0.955128	2.95683
p.Arg81Ser	1.34187	0.190527	1.29353	2.37902
p.Arg82Cys	0.825545	0.302052	4.72343	2.74974
p.Arg82Gly	1.04707	0.31441	-3.80758	2.71287
p.Arg82His	0.895966	0.298179	-2.59225	1.76672
p.Arg82Leu	0.288283	0.149774	2.78578	4.61622
p.Arg82Pro	1.09778	0.402087	2.65489	0.438768
p.Arg82Ser	0.837366	0.352881	1.49495	1.77268
p.Leu83Met	1.28382	0.591451	-0.395729	5.72584
p.Leu83Pro	0.854666	0.372131	5.08734	3.45583
p.Leu83Gln	0.462527	0.0882083	-0.192689	2.25887
p.Leu83Val	0.999341	0.376227	2.2506	2.90321
p.Gln84Glu	0.848991	0.186654	3.80696	2.83594
p.Gln84Arg	0.990387	0.385955	1.30546	2.96613
p.Asn85Asp	4.63531	0.821184	-7.26425	3.17049
p.Asn85His	1.52743	0.324762	6.01179	2.03801
p.Asn85Ile	1.03931	0.405048	-0.62708	2.97225
p.Asn85Lys	0.997968	0.261015	8.08911	1.83199
p.Asn85Ser	1.40555	0.274526	-1.83604	1.15328
p.Asn85Thr	2.35606	0.223366	1.87639	2.13001
p.Asn85Tyr	3.04054	0.597895	2.20576	2.40852
p.Trp86Cys	1.34255	0.383132	4.03524	1.29774
p.Trp86Gly	0.763913	0.0791733	3.11613	1.87024
p.Trp86Leu	0.880975	0.172875	-1.64292	4.71668
p.Trp86Arg	0.482397	0.0453345	-1.41329	3.20549
p.Trp86Ser	0.807293	0.133015	0.740543	0.770913
p.Val87Ala	1.14376	0.348079	1.21394	1.04667
p.Val87Phe	1.11599	0.291855	-0.56242	2.19566
p.Val87Gly	1.00723	0.275947	1.66364	3.36275
p.Val87Ile	1.1055	0.271124	3.65197	3.78241
p.Val87Leu	0.921657	0.232396	-5.84529	1.5575
p.Tyr88Phe	0.921549	0.454707	4.05318	0.886723
p.Tyr88His	0.870012	0.178962	-0.966475	0.747209
p.Tyr88Asn	1.27927	0.476	5.72375	2.89253
p.Asn89Asp	2.36547	0.282246	0.421756	1.82905
p.Asn89His	1.07072	0.295877	-5.73126	3.79509
p.Asn89Ile	1.61118	0.314679	-4.50965	2.33665
p.Asn89Lys	1.19832	0.208221	-1.60513	1.3131
p.Asn89Ser	1.25193	0.156257	-1.406	3.50669
p.Asn89Thr	1.91346	0.293528	-5.13152	2.76858
p.Asn89Tyr	1.95473	0.329207	0.15448	2.76394
p.Val90Ala	2.45922	0.312021	4.18423	1.312
p.Val90Glu	0.663529	0.167373	2.90546	2.60509
p.Val90Gly	2.43385	0.507523	8.4334	3.46322
p.Val90Leu	0.370041	0.0579866	2.01015	1.35182
p.Val90Met	1.59368	0.379802	3.58303	2.36455
p.Leu91Met	1.14864	0.454496	-6.74451	4.04936
p.Leu91Val	1.04765	0.36538	1.92597	0.0155223
p.Glu92Asp	0.733214	0.211462	-3.48875	2.95873
p.Glu92Gln	0.961181	0.21798	8.46413	1.77926
p.Glu92Val	0.310386	0.117052	20.4482	1.63866
p.Arg93Gly	1.15953	0.316253	0.935319	3.45839
p.Arg93Leu	3.01608	0.62618	2.93307	4.06766
p.Arg93Gln	4.14699	1.30567	-0.596348	4.77046
p.Arg93Trp	1.2906	0.378519	7.11352	4.25388
p.Pro94Ser	0.250934	0.117773	5.56068	8.37512
p.Arg95Cys	1.01984	0.426999	-1.42413	2.90775
p.Arg95Gly	0.699787	0.230647	0.0470477	1.5519
p.Arg95His	1.38658	0.365942	-6.63481	1.80833
p.Arg95Ser	1.2028	0.509266	-3.34279	1.96712
p.Gly96Ala	1.11759	0.0866708	4.36732	2.24832
p.Gly96Asp	1.47157	0.767598	5.63063	3.44205
p.Gly96Arg	1.47999	0.429607	2.01621	1.75655
p.Gly96Ser	1.24438	0.186231	0.194622	2.76141
p.Trp97Cys	1.55263	0.176401	6.0463	2.0756
p.Trp97Gly	0.877319	0.158828	1.45734	3.55951
p.Trp97Leu	1.34512	0.267721	3.83137	4.31709
p.Trp97Arg	1.27297	0.105143	4.49553	2.60754
p.Trp97Ser	1.34922	0.4174	6.91534	2.67865
p.Ala98Asp	1.11664	0.311838	1.90754	0.919704
p.Ala98Gly	0.664308	0.204377	-5.75504	0.598294
p.Ala98Pro	0.818788	0.247735	1.95852	4.89177
p.Ala98Ser	0.680614	0.14175	1.39849	0.993935
p.Ala98Thr	0.763563	0.0707882	4.20677	4.86534
p.Ala98Val	0.763073	0.188488	-1.30999	3.21224
p.Phe99Cys	1.11347	0.341354	-5.58006	4.09746
p.Phe99Ile	0.756806	0.226818	-4.27109	2.96789
p.Phe99Leu	1.00005	0.336857	-0.384468	7.28653
p.Phe99Ser	1.04342	0.335535	5.26838	1.15974
p.Phe99Val	0.957764	0.13437	7.72027	1.7739
p.Phe99Tyr	1.0404	0.322908	-3.22849	2.56068
p.Val100Ala	1.02217	0.276203	-0.143758	2.95585
p.Val100Gly	1.04593	0.591324	-0.149827	3.60693
p.Val100Ile	0.938996	0.109955	1.27933	2.32412
p.Val100Leu	0.728192	0.179371	3.80647	2.11895
p.Tyr101Phe	0.858855	0.0719591	-0.716453	1.44319
p.Tyr101His	0.630923	0.112813	3.11218	2.43633
p.His102Asn	0.926185	0.438466	-1.37992	4.00521
p.His102Pro	0.75993	0.268854	24.1376	1.60937
p.His102Gln	0.932251	0.22165	-5.69886	1.53693
p.His102Arg	0.316075	0.0821921	5.64691	2.23115
p.His102Tyr	1.41795	0.14571	9.8985	0.825914
p.Val103Ala	0.881867	0.258604	-0.0451035	4.61519
p.Val103Phe	0.771386	0.173842	5.93075	4.56817
p.Val103Gly	0.945756	0.236419	-0.0503402	1.80021
p.Val103Ile	0.990673	0.244838	-1.43623	2.43947
p.Val103Leu	0.279776	0.0981713	6.33111	2.02607
p.Phe104Cys	1.00922	0.377868	5.26814	1.38775
p.Phe104Ile	0.864465	0.266787	-2.54825	2.25702
p.Phe104Leu	0.68775	0.223441	-2.9902	4.91495
p.Phe104Val	1.32627	0.38993	7.01353	1.49304
p.Phe104Tyr	0.742507	0.254915	1.22755	3.61904
p.Ile105Leu	0.85484	0.428622	18.7857	3.16518
p.Ile105Met	0.788784	0.18002	6.3293	2.25691
p.Ile105Thr	0.80032	0.255353	-1.73913	4.72055
p.Ile105Val	1.12514	0.0611036	5.66137	1.16518
p.Phe106Cys	1.02539	0.246474	7.67249	1.61717
p.Phe106Ile	0.655784	0.16019	6.86613	3.94733
p.Phe106Leu	0.949094	0.270976	16.5503	1.20678
p.Phe106Ser	0.878342	0.316368	3.67023	2.25124
p.Phe106Val	1.01352	0.330698	-0.115928	1.92201
p.Phe106Tyr	0.902019	0.374643	16.1336	3.74992
p.Leu107Phe	0.642101	0.137681	20.936	2.92279
p.Leu107Met	0.822306	0.200185	0.889561	0.664725
p.Leu107Val	0.755078	0.164607	-4.58213	2.12874
p.Leu107Trp	0.35414	0.0538968	7.3346	3.72412
p.Leu108Met	0.890376	0.298592	4.26995	2.75395
p.Leu108Pro	0.813101	0.179972	24.3987	3.5924
p.Leu108Gln	0.696226	0.262818	0.0878362	5.76122
p.Leu108Val	0.855247	0.277682	3.91031	2.61307
p.Val109Phe	0.991048	0.281323	1.5636	5.18888
p.Val109Ile	1.68288	0.228932	13.6071	1.3295
p.Val109Leu	0.746723	0.07068	14.302	2.36352
p.Phe110Cys	0.857407	0.151025	1.43578	1.96613
p.Phe110Ile	0.982814	0.363472	1.50853	2.04164
p.Phe110Leu	0.261601	0.0595172	3.21538	1.7437
p.Phe110Ser	0.943871	0.270161	-4.04696	4.16337
p.Phe110Val	0.761902	0.197177	0.498571	4.1856
p.Phe110Tyr	0.88933	0.217361	11.4751	2.21881
p.Ser111Cys	0.908363	0.110682	-1.65067	3.46141
p.Ser111Gly	0.711659	0.151277	-3.69703	2.58923
p.Ser111Ile	0.738128	0.0755352	-1.87967	1.54222
p.Ser111Asn	0.672703	0.15401	6.38562	1.99717
p.Ser111Thr	0.731508	0.360748	0.437871	1.74178
p.Cys112Phe	0.593498	0.0925446	3.82183	1.75454
p.Cys112Gly	0.917602	0.228583	-2.93763	3.64328
p.Cys112Arg	0.623879	0.0417351	2.96618	2.26921
p.Cys112Ser	0.702587	0.224488	-2.30232	2.24358
p.Cys112Tyr	0.818934	0.347394	-0.601374	5.99844
p.Leu113Met	0.941635	0.471762	6.10462	2.32691
p.Leu113Pro	0.920168	0.148465	6.0924	3.59923
p.Leu113Gln	1.15303	0.490393	4.06024	2.61946
p.Leu113Arg	1.15965	0.418846	25.8322	8.67154
p.Leu113Val	0.807453	0.147487	15.7572	3.11932
p.Val114Ala	2.7295	0.443732	1.5016	1.73614
p.Val114Glu	1.08484	0.311436	4.70392	2.53298
p.Val114Gly	0.791683	0.318284	0.276182	1.89202
p.Val114Leu	1.9671	0.492617	2.54219	2.19355
p.Val114Met	0.380008	0.0650092	0.952287	2.67143
p.Leu115Met	1.19206	0.319767	-0.422831	3.03015
p.Leu115Pro	0.806552	0.215012	13.2594	0.998773
p.Leu115Gln	1.03181	0.148965	3.73385	4.8379
p.Leu115Arg	1.00291	0.575674	8.24802	1.03728
p.Leu115Val	1.09172	0.567503	-0.322731	3.67321
p.Ser116Ala	0.873759	0.297808	8.84544	1.39475
p.Ser116Cys	0.776873	0.28949	19.4697	4.63603
p.Ser116Phe	1.91193	0.250801	8.88405	1.54561
p.Ser116Pro	0.740558	0.139866	-20.578	3.94355
p.Ser116Thr	1.01399	0.165564	5.02504	1.35105
p.Ser116Tyr	0.684821	0.0563087	1.09146	4.67831
p.Val117Ala	1.13047	0.32055	-8.06867	2.44086
p.Val117Gly	1.13222	0.344104	-24.1335	1.64566
p.Val117Leu	0.861465	0.148505	9.48539	2.79806
p.Val117Met	1.11077	0.0418636	-11.8448	0.746981
p.Leu118Met	1.14238	0.353087	-1.49643	1.64089
p.Leu118Gln	0.868555	0.208312	-2.44093	4.54179
p.Leu118Arg	0.733087	0.263524	-2.67361	3.78281
p.Leu118Val	0.904558	0.375853	4.51655	1.22323
p.Ser119Ala	0.9745	0.306567	-2.87471	4.37778
p.Ser119Phe	1.06348	0.0429892	-2.44633	1.69301
p.Ser119Pro	0.877125	0.150608	-11.5788	1.87632
p.Ser119Thr	0.728398	0.158055	-2.8036	1.7764
p.Ser119Tyr	1.09345	0.362136	3.61111	2.26731
p.Thr120Ala	0.752682	0.290179	8.93077	2.31699
p.Thr120Ile	0.586384	0.0940544	11.0534	2.38162
p.Thr120Asn	0.864301	0.250934	7.4105	3.18641
p.Thr120Pro	0.966449	0.246727	-4.93535	3.74273
p.Thr120Ser	1.13746	0.166275	2.8049	1.84175
p.Ile121Phe	0.861034	0.223241	1.12999	0.940578
p.Ile121Leu	0.962042	0.380195	8.55728	1.59233
p.Ile121Met	1.22985	0.552825	-3.71576	2.84602
p.Ile121Asn	0.893474	0.226843	1.98333	3.45086
p.Ile121Ser	0.822246	0.185721	2.63235	3.89873
p.Ile121Thr	0.962281	0.143658	-3.76992	2.53517
p.Ile121Val	0.87382	0.252868	3.06655	2.04134
p.Gln122Glu	0.915001	0.158504	-9.47633	4.95416
p.Gln122His	0.813878	0.14068	1.45509	4.01333
p.Gln122Lys	0.713475	0.198759	-5.11376	4.02683
p.Gln122Pro	0.983481	0.185267	-2.70802	3.10445
p.Gln122Arg	0.946703	0.159513	6.88414	1.91057
p.Glu123Ala	0.617646	0.0242983	1.0322	3.6398
p.Glu123Asp	0.888846	0.21241	-3.18081	0.85976
p.Glu123Gly	0.852514	0.169016	7.38806	2.08773
p.Glu123Lys	0.332909	0.0971207	-2.78092	5.51015
p.Glu123Gln	1.09647	0.258873	1.5278	3.65764
p.Glu123Val	1.07054	0.197805	3.2917	1.7231
p.His124Asp	0.718031	0.190971	-13.2191	1.87558
p.His124Leu	0.891022	0.293163	1.71948	3.90371
p.His124Asn	0.640556	0.0769691	3.83864	2.43528
p.His124Pro	1.13304	0.194542	5.29386	0.563678
p.His124Gln	0.930007	0.242787	1.78326	2.24197
p.His124Arg	0.813033	0.18781	3.1299	1.71474
p.His124Tyr	0.956243	0.198128	5.55278	1.11014
p.Gln125Glu	0.788772	0.119227	1.2976	4.57836
p.Gln125His	0.776363	0.147866	11.094	1.34958
p.Gln125Lys	0.742434	0.117456	0.38164	5.06782
p.Gln125Leu	0.859483	0.107025	-0.00766317	2.96559
p.Gln125Pro	0.755498	0.18042	-1.70693	3.47636
p.Gln125Arg	1.0745	0.287419	7.22393	2.29425
p.Glu126Ala	0.838703	0.253995	-0.382175	4.42316
p.Glu126Asp	0.815652	0.175046	-1.41584	4.43662
p.Glu126Gly	0.723306	0.0933659	-6.29793	1.73292
p.Glu126Lys	0.606489	0.106316	7.87627	1.63068
p.Glu126Gln	1.02266	0.187997	3.84612	2.36022
p.Glu126Val	0.925045	0.181606	2.84078	2.273
p.Leu127Phe	1.00756	0.130701	2.63823	2.03056
p.Leu127His	1.06535	0.203313	3.10112	2.08918
p.Leu127Ile	0.833513	0.121242	4.08513	2.04059
p.Leu127Pro	0.828979	0.0806761	0.899527	1.51966
p.Leu127Arg	0.579936	0.0739681	6.39831	0.744066
p.Leu127Val	0.651893	0.100651	1.73655	1.63921
p.Ala128Asp	0.799089	0.167827	3.52424	2.20115
p.Ala128Gly	1.00302	0.20606	2.56118	4.20678
p.Ala128Pro	0.956364	0.191946	1.80469	2.58502
p.Ala128Ser	0.653538	0.204586	4.06481	1.80934
p.Ala128Thr	1.02154	0.443121	-1.0417	5.54159
p.Ala128Val	0.749456	0.27995	1.51613	5.03347
p.Asn129Asp	1.07372	0.500206	-3.32583	3.42718
p.Asn129His	0.893574	0.159449	3.19417	1.81098
p.Asn129Ile	0.928504	0.184794	0.185892	1.79325
p.Asn129Lys	0.855102	0.188302	1.67131	2.78158
p.Asn129Thr	0.975005	0.137646	2.42809	1.93959
p.Asn129Tyr	0.822513	0.233163	0.147791	2.11785
p.Glu130Ala	1.0664	0.123268	1.77811	1.93215
p.Glu130Asp	0.80117	0.0684971	-0.440175	3.36513
p.Glu130Gly	1.01834	0.48557	-6.48979	7.2867
p.Glu130Lys	0.641535	0.177611	-1.08018	3.37539
p.Glu130Gln	1.11146	0.22935	3.00176	2.42081
p.Glu130Val	0.830238	0.114324	-0.617352	2.94925
p.Cys131Phe	1.30275	0.172056	1.42169	1.93955
p.Cys131Gly	0.641369	0.065236	-15.6274	1.17662
p.Cys131Arg	0.611611	0.125952	-1.99831	5.37848
p.Cys131Ser	0.82846	0.159314	0.762991	1.03746
p.Cys131Trp	0.938877	0.168626	2.99912	2.42298
p.Cys131Tyr	1.04314	0.234269	1.43426	2.68085
p.Leu132Phe	1.65482	0.206288	0.557499	4.48369
p.Leu132His	1.16381	0.131045	1.57826	3.00498
p.Leu132Ile	2.21099	0.323885	-5.13191	1.64411
p.Leu132Pro	0.475336	0.0678155	31.8396	1.16697
p.Leu132Arg	1.16137	0.448924	10.9652	1.56243
p.Leu132Val	1.3031	0.385048	1.31021	1.51052
p.Leu133Phe	0.673441	0.158943	14.57	2.21026
p.Leu133His	0.812522	0.327858	16.4556	5.00459
p.Leu133Ile	0.868963	0.33504	16.265	3.22549
p.Leu133Pro	0.857164	0.23384	20.9344	2.49856
p.Leu133Arg	0.655924	0.106984	33.0644	1.3947
p.Leu133Val	1.21404	0.384167	13.1854	1.2782
p.Ile134Phe	1.1089	0.267576	-0.699972	1.91568
p.Ile134Leu	1.09184	0.278207	2.99387	2.17794
p.Ile134Met	0.862712	0.26743	-0.0905603	3.21493
p.Ile134Asn	0.981985	0.237251	2.26766	4.23001
p.Ile134Ser	0.720099	0.26906	6.96162	3.87784
p.Ile134Thr	1.14013	0.258886	0.33403	2.59854
p.Ile134Val	0.656275	0.123359	-3.01536	7.35146
p.Leu135Phe	1.42011	0.314766	-8.9907	2.82334
p.Leu135Met	0.984217	0.24207	-10.1112	1.80499
p.Leu135Ser	0.845571	0.180029	-6.06895	1.60915
p.Leu135Val	0.742359	0.278055	5.08843	2.14071
p.Leu135Trp	0.955673	0.322268	-2.2823	2.29351
p.Glu136Ala	1.28946	0.46641	21.4115	4.71642
p.Glu136Asp	2.39026	0.255929	10.4921	2.43807
p.Glu136Gly	2.01805	0.252561	19.4735	2.61249
p.Glu136Lys	0.498866	0.138665	29.9402	2.04678
p.Glu136Gln	1.41811	0.40427	18.022	2.79279
p.Glu136Val	0.632031	0.0781615	37.5838	0.129262
p.Phe137Cys	1.00933	0.255459	-10.1122	1.55116
p.Phe137Ile	0.813938	0.153147	-1.00426	1.95052
p.Phe137Leu	1.21846	0.404382	-6.09567	1.56524
p.Phe137Ser	0.973398	0.174263	2.72173	3.65322
p.Phe137Val	0.637118	0.154911	-4.64926	2.53097
p.Phe137Tyr	0.760542	0.149781	6.47839	3.48356
p.Val138Ala	0.821354	0.0994804	-2.21404	3.48523
p.Val138Gly	1.14752	0.204623	6.08596	1.46562
p.Val138Leu	1.21719	0.514869	-5.15922	1.8308
p.Val138Met	0.99124	0.333182	4.68516	2.88267
p.Met139Ile	0.904526	0.188458	8.47136	1.47637
p.Met139Leu	1.52721	0.328302	1.75928	2.5864
p.Met139Arg	0.885812	0.190001	1.07828	3.7343
p.Met139Thr	0.968051	0.271241	0.735119	2.57031
p.Met139Val	1.44258	0.310694	5.09566	2.79064
p.Ile140Phe	1.02767	0.234315	-0.195117	3.08204
p.Ile140Leu	0.866837	0.262403	-6.73966	2.62758
p.Ile140Met	1.16204	0.332684	3.80211	1.85773
p.Ile140Asn	0.32923	0.126874	1.42378	4.65205
p.Ile140Ser	1.12366	0.213681	-13.091	2.18469
p.Ile140Thr	0.752538	0.160766	5.04466	2.59378
p.Ile140Val	0.89801	0.376861	3.5833	1.95969
p.Val141Ala	0.996858	0.48036	-4.08316	2.97366
p.Val141Glu	0.316618	0.121584	19.5445	0.42672
p.Val141Gly	1.60318	0.306786	-3.0458	1.60077
p.Val141Leu	1.04935	0.280436	0.142952	4.00891
p.Val141Met	1.2432	0.511858	9.54639	1.06373
p.Val142Ala	0.629139	0.109312	-6.231	3.23523
p.Val142Phe	1.2548	0.267825	2.06797	2.24727
p.Val142Gly	1.19647	0.524484	3.02855	2.61725
p.Val142Ile	1.07813	0.151282	4.62567	1.10719
p.Val142Leu	1.27647	0.181028	-0.061931	1.15869
p.Phe143Cys	0.779001	0.127924	7.24878	2.23159
p.Phe143Ile	0.975551	0.336029	-6.91902	1.40061
p.Phe143Leu	1.15783	0.263616	-1.5107	4.40761
p.Phe143Ser	1.09654	0.383131	-4.0997	3.26807
p.Phe143Val	1.1457	0.197042	2.20497	0.993879
p.Phe143Tyr	0.964367	0.254545	14.6176	1.14886
p.Gly144Ala	1.11244	0.417278	-4.00708	3.01215
p.Gly144Cys	0.915992	0.311193	1.61911	3.22467
p.Gly144Asp	0.550954	0.1226	6.43974	3.2617
p.Gly144Ser	0.883926	0.107504	8.76404	1.46835
p.Gly144Val	0.898134	0.116342	4.51402	3.24271
p.Leu145Phe	0.850307	0.310323	1.66721	2.65575
p.Leu145Met	0.75696	0.237114	1.06598	3.46818
p.Leu145Ser	1.24305	0.312212	3.78234	3.20026
p.Leu145Val	1.01525	0.350577	-0.711435	1.42741
p.Leu145Trp	1.04197	0.495101	5.26036	3.19447
p.Glu146Asp	0.900692	0.290717	-1.5083	3.1212
p.Tyr147Cys	0.745143	0.139842	3.77871	3.07979
p.Tyr147Asp	0.656182	0.129443	1.47962	2.148
p.Tyr147Phe	1.24047	0.218564	2.30373	3.35393
p.Tyr147His	0.277149	0.097391	-5.51826	9.20629
p.Tyr147Asn	0.564238	0.0619452	-2.12877	3.15935
p.Tyr147Ser	0.418515	0.0427606	1.12737	2.29675
p.Ile148Phe	1.21493	0.603474	2.05302	4.30844
p.Ile148Met	0.805443	0.194334	-6.167	1.1728
p.Ile148Asn	0.339026	0.118249	3.75685	2.58144
p.Ile148Ser	0.970383	0.288201	5.36561	3.28519
p.Ile148Thr	1.01127	0.188133	2.01624	1.42564
p.Ile148Val	1.15369	0.190539	-0.473947	0.889208
p.Val149Ala	1.8384	0.178595	0.120902	2.45661
p.Val149Phe	1.12958	0.404539	12.9639	2.22773
p.Val149Gly	0.619942	0.115769	-6.73374	2.95003
p.Val149Ile	0.734734	0.190606	0.279765	5.92387
p.Val149Leu	1.4916	0.357754	2.58215	1.47523
p.Arg150Leu	1.13288	0.364121	-1.10099	2.83221
p.Arg150Trp	0.279461	0.0487131	16.8124	5.64151
p.Val151Ala	0.317351	0.0561213	-7.78858	3.51058
p.Val151Phe	0.938328	0.437215	-1.78918	3.4192
p.Val151Ile	1.15445	0.297762	6.0164	1.2425
p.Val151Leu	1.0704	0.303559	-0.854312	3.52612
p.Ser153Ala	1.18633	0.377022	-4.13556	2.75309
p.Ser153Cys	0.978797	0.194886	1.28395	2.83477
p.Ala154Ser	1.10512	0.301421	5.2514	2.32982
p.Ala154Val	1.40355	0.291226	-3.0876	2.40955
p.Gly155Ala	0.632781	0.11564	2.7836	2.1554
p.Cys156Phe	0.984314	0.150357	3.50498	1.53039
p.Cys156Gly	4.84393	0.696615	-2.58363	1.30568
p.Cys156Arg	0.847447	0.144658	3.20713	3.06411
p.Cys156Ser	2.95486	0.700486	-9.64784	2.84064
p.Cys156Trp	0.991004	0.155983	11.8575	1.05237
p.Cys156Tyr	1.65948	0.2601	6.30051	1.37764
p.Cys157Phe	2.02843	0.341132	1.12428	2.27477
p.Cys157Gly	1.80798	0.220917	-3.00119	1.65804
p.Cys157Arg	0.967977	0.158147	3.17513	1.76451
p.Cys157Ser	2.13876	0.265795	0.00845558	1.81892
p.Cys157Trp	1.19918	0.275819	3.28009	1.52471
p.Cys157Tyr	1.49063	0.202549	2.65863	1.74794
p.Cys158Phe	3.2101	0.555639	-3.53645	2.01803
p.Cys158Gly	0.926354	0.139808	6.82623	0.971941
p.Cys158Arg	1.81803	0.208415	2.31734	1.66536
p.Cys158Ser	0.83362	0.397632	-3.51571	1.82348
p.Cys158Trp	2.37741	0.311714	-1.14646	1.24567
p.Cys158Tyr	1.84282	0.260255	-0.21656	2.01199
p.Arg159Cys	1.19033	0.210974	-11.1397	1.90803
p.Arg159Gly	3.20293	0.513651	-11.8832	1.21911
p.Arg159His	4.11317	0.811673	-11.3039	1.85389
p.Arg159Leu	3.11859	0.662619	-4.63092	2.78904
p.Arg159Pro	3.81379	0.8107	-3.30178	3.4234
p.Arg159Ser	3.44593	0.373321	-9.45184	2.94497
p.Tyr160Phe	0.614412	0.241985	0.891073	2.78798
p.Arg161Gly	3.00107	0.831108	-1.82798	2.073
p.Arg161Leu	0.728342	0.233149	-7.20084	1.81899
p.Arg161Gln	1.33311	0.227317	3.28404	1.95325
p.Gly162Ala	0.767357	0.0573548	2.91074	0.955469
p.Gly162Glu	0.667814	0.0796559	6.11856	2.11456
p.Trp163Cys	0.799341	0.127539	1.49395	3.73742
p.Trp163Leu	0.94863	0.315073	1.48124	4.51264
p.Trp163Arg	0.602132	0.138923	6.84369	2.16376
p.Gln164Glu	0.768085	0.217909	1.88032	2.5758
p.Gln164His	0.782725	0.318611	-1.44393	3.47742
p.Gln164Lys	0.7166	0.0645883	0.297649	5.84091
p.Gln164Leu	0.718427	0.0979047	-0.118693	3.16762
p.Gln164Pro	0.846569	0.236749	7.20134	0.80476
p.Gln164Arg	0.883668	0.199523	-1.4699	2.34955
p.Arg166Cys	1.08797	0.795919	2.25479	2.81981
p.Arg166Gly	0.284191	0.0499477	1.43939	3.10144
p.Arg166His	0.868836	0.190374	-0.868949	3.03914
p.Arg166Leu	1.73278	0.214276	-1.63211	2.17352
p.Arg166Ser	0.861466	0.361951	2.13184	3.05643
p.Phe167Cys	1.00124	0.391277	-0.35088	1.83818
p.Phe167Ile	0.715409	0.132934	-6.81783	1.87806
p.Phe167Leu	0.976235	0.205021	2.47585	1.69208
p.Phe167Ser	0.703587	0.228514	9.06858	1.95619
p.Phe167Val	1.17238	0.158268	2.60237	2.17206
p.Phe167Tyr	1.01282	0.175652	6.88296	1.94232
p.Arg168Cys	1.76919	0.234023	-2.4379	0.797348
p.Arg168Gly	0.798655	0.28133	-2.70205	4.53963
p.Arg168His	1.63383	0.232542	-1.01608	1.37701
p.Arg168Leu	1.84976	0.309512	-4.38688	1.84379
p.Arg168Ser	1.12824	0.15651	4.22827	1.72825
p.Phe169Tyr	0.93449	0.158713	6.29219	1.24321
p.Ala170Gly	0.682666	0.108968	-0.146533	3.8875
p.Ala170Ser	1.09826	0.196691	-5.56723	6.67854
p.Ala170Thr	1.05349	0.40897	-0.619671	2.92799
p.Ala170Val	1.2044	0.275611	8.81495	1.72606
p.Arg171Gly	0.780573	0.153395	-6.76522	2.33406
p.Arg171Ile	1.41044	0.23146	-4.24992	2.75677
p.Arg171Lys	0.915726	0.240664	0.581972	1.06373
p.Arg171Ser	1.36622	0.272105	0.729817	1.83479
p.Arg171Thr	1.17921	0.245865	-2.33318	3.60676
p.Lys172Glu	1.07799	0.297826	17.7213	1.14387
p.Lys172Met	1.43821	0.365274	0.433257	2.68085
p.Lys172Asn	1.60201	0.297122	7.83561	1.85848
p.Lys172Gln	0.895582	0.225117	13.2778	0.961949
p.Lys172Arg	0.775488	0.144095	7.40659	1.9888
p.Lys172Thr	1.20162	0.168505	7.93833	2.76493
p.Pro173Ala	0.66459	0.225125	-1.90172	3.99488
p.Pro173Leu	0.970853	0.190954	2.86852	2.31528
p.Pro173Ser	0.847059	0.223312	16.8881	2.59568
p.Pro173Thr	0.677158	0.128177	11.5719	0.858352
p.Phe174Cys	0.677758	0.231631	-4.77266	5.6027
p.Phe174Ile	0.797746	0.154386	-6.72015	2.63374
p.Phe174Leu	1.26407	0.127549	1.23298	2.30722
p.Phe174Ser	1.01076	0.443435	-7.95672	1.91422
p.Phe174Val	2.33946	0.295184	-10.4345	2.53123
p.Phe174Tyr	1.14064	0.0948286	6.85951	1.60625
p.Cys175Phe	0.713751	0.274679	23.3144	1.72225
p.Cys175Gly	1.47366	0.666462	2.29834	0.822998
p.Cys175Arg	0.912072	0.297222	30.8386	3.32051
p.Cys175Ser	0.831447	0.313442	0.479986	1.96995
p.Cys175Tyr	0.884928	0.220636	16.9855	0.11377
p.Val176Ala	1.22501	0.217623	0.099199	1.88635
p.Val176Gly	0.62119	0.132873	-1.03884	1.71801
p.Val176Ile	0.815435	0.227016	-4.31139	3.1333
p.Val176Leu	0.970134	0.219404	-3.2342	2.4257
p.Ile177Phe	1.10714	0.227019	-12.9418	2.05426
p.Ile177Leu	0.754948	0.269113	-2.12484	4.26372
p.Ile177Met	0.681808	0.113715	3.87281	1.16936
p.Ile177Asn	0.81138	0.174489	16.6963	1.69179
p.Ile177Ser	1.40254	0.271935	17.0529	1.40004
p.Ile177Thr	0.616582	0.130846	6.03376	2.54453
p.Ile177Val	0.967294	0.301668	-2.77593	5.01404
p.Asp178Ala	0.894494	0.168098	36.0693	0.864088
p.Asp178Glu	1.7131	0.20868	18.2582	1.86333
p.Asp178Gly	0.509272	0.153061	33.6453	2.4983
p.Asp178His	0.794736	0.206979	38.8761	0.890832
p.Asp178Tyr	0.806826	0.299485	36.8169	0.787462
p.Phe179Cys	0.767087	0.260181	1.49224	4.47043
p.Phe179Leu	0.966652	0.199039	4.95025	2.37116
p.Phe179Ser	0.682563	0.167981	-7.13554	1.71163
p.Phe179Val	0.922982	0.20757	-1.5272	1.99216
p.Ile180Phe	0.651905	0.107569	-5.91779	1.07954
p.Ile180Leu	0.834158	0.205411	3.55149	1.08326
p.Ile180Met	0.847444	0.107876	17.3753	2.68692
p.Ile180Ser	0.799716	0.25082	-3.31809	2.23716
p.Ile180Thr	1.17623	0.37131	4.1549	2.74055
p.Ile180Val	0.924361	0.402246	0.339837	2.97809
p.Val181Ala	0.798117	0.171952	18.6235	3.99283
p.Val181Gly	0.85981	0.212123	31.5874	0.965443
p.Val181Leu	1.25175	0.126094	-32.2449	5.78128
p.Val181Met	0.956877	0.216411	4.08356	2.69138
p.Phe182Cys	1.1061	0.468333	-1.6313	1.74161
p.Phe182Ile	0.867113	0.141888	-0.969443	1.10364
p.Phe182Leu	0.828963	0.210568	-1.73418	5.37366
p.Phe182Ser	1.05109	0.367705	2.01295	2.43786
p.Phe182Val	0.638846	0.0961934	-3.45831	4.87507
p.Phe182Tyr	0.850554	0.38615	4.03774	2.82316
p.Val183Ala	0.859383	0.1923	-1.02164	4.1642
p.Val183Gly	0.7395	0.221064	-0.683299	7.50169
p.Val183Leu	1.2907	0.129335	0.262116	1.22617
p.Val183Met	0.699546	0.226983	0.121768	2.57112
p.Ala184Asp	0.743502	0.117746	17.335	1.40038
p.Ala184Gly	1.01484	0.296251	-6.56601	4.88519
p.Ala184Pro	0.593404	0.0801279	6.54946	2.16062
p.Ala184Ser	0.927146	0.322548	-3.55962	4.6857
p.Ala184Thr	0.757558	0.343339	2.04484	1.83276
p.Ala184Val	0.851076	0.142008	17.5051	1.19639
p.Ser185Ala	0.903744	0.2639	-1.88567	4.79915
p.Ser185Leu	0.948097	0.233721	7.25803	2.18273
p.Ser185Pro	0.459908	0.157109	8.40213	2.76746
p.Ser185Thr	1.00921	0.395323	-4.41045	2.71147
p.Val186Ala	0.912394	0.120941	-2.04992	3.04621
p.Val186Leu	0.846062	0.254286	-3.96126	1.7388
p.Val186Met	0.907021	0.21611	1.52208	2.37183
p.Ala187Gly	0.87557	0.209831	-0.835375	2.97626
p.Ala187Pro	0.973699	0.200599	3.57158	2.31353
p.Ala187Ser	0.804379	0.122211	8.73419	2.14281
p.Ala187Thr	0.786987	0.126123	0.547321	0.66719
p.Ala187Val	0.966104	0.16274	-3.36688	1.80613
p.Val188Ala	0.821925	0.349825	3.15864	4.86437
p.Val188Asp	1.00387	0.231674	20.4748	2.75633
p.Val188Phe	0.731822	0.251907	20.6457	3.86787
p.Val188Gly	0.94568	0.345033	27.4362	0.987313
p.Val188Ile	1.1551	0.344573	-0.768123	2.82661
p.Val188Leu	0.681003	0.232708	21.7952	2.21962
p.Ile189Phe	0.71841	0.135232	-6.02734	4.9495
p.Ile189Met	0.998383	0.216888	-3.65225	1.8238
p.Ile189Asn	0.625092	0.0694506	16.0776	4.09336
p.Ile189Ser	0.761788	0.228918	5.3503	1.19182
p.Ile189Thr	0.872758	0.306998	-4.58349	2.13852
p.Ala190Gly	0.862921	0.169103	7.36423	2.33573
p.Ala190Ser	0.623569	0.198987	0.127924	1.16781
p.Ala190Thr	0.971411	0.120612	-2.86195	5.86178
p.Ala190Val	1.14366	0.189665	-16.7142	5.43733
p.Ala191Glu	1.0796	0.627613	22.8329	2.61173
p.Ala191Gly	0.633623	0.206448	5.65209	1.25424
p.Ala191Pro	0.778806	0.207334	7.92132	1.90223
p.Ala191Ser	1.06021	0.204232	19.3731	3.13019
p.Ala191Val	1.14087	0.208955	-10.5835	2.0087
p.Gly192Cys	0.331438	0.0956123	-9.88269	3.09595
p.Gly192Asp	0.973959	0.264312	13.6955	2.43999
p.Gly192Arg	1.02783	0.404315	-21.6951	3.51458
p.Gly192Ser	0.642438	0.164489	-18.0183	2.62911
p.Thr193Ala	0.865132	0.253039	6.93447	0.683985
p.Thr193Asn	0.677198	0.0810939	3.23143	4.82909
p.Thr193Pro	0.656471	0.13875	20.0014	2.77014
p.Thr193Ser	0.658306	0.147619	-4.56696	2.94414
p.Gln194Glu	0.79486	0.353837	4.09687	2.89043
p.Gln194His	0.876645	0.130851	2.82505	6.18985
p.Gln194Lys	1.20109	0.579492	3.85887	3.4736
p.Gln194Leu	1.13089	0.250004	-6.40439	4.51608
p.Gln194Pro	0.607425	0.0856585	29.1079	3.29112
p.Gln194Arg	0.599328	0.0999004	-0.362464	4.39184
p.Gly195Ala	0.804037	0.21966	4.97676	2.02397
p.Gly195Cys	0.857763	0.0928916	-20.889	2.95711
p.Gly195Asp	0.696044	0.309816	-0.337942	5.38044
p.Gly195Arg	0.712024	0.157951	8.56856	0.613789
p.Gly195Ser	1.12318	0.12791	3.15921	1.54501
p.Gly195Val	0.753834	0.130909	8.24959	2.09937
p.Asn196Asp	0.866043	0.195618	-0.494191	3.46672
p.Asn196His	0.649652	0.129081	6.894	2.22125
p.Asn196Lys	0.729964	0.108103	2.7071	1.9661
p.Asn196Ser	0.881483	0.122172	16.0586	1.30135
p.Asn196Thr	0.784377	0.150082	20.6006	1.18141
p.Asn196Tyr	0.707211	0.0881774	22.3196	2.82364
p.Ile197Phe	1.02323	0.344882	11.2197	1.87658
p.Ile197Leu	0.820582	0.256247	16.7081	1.67206
p.Ile197Met	0.743615	0.297402	-1.47087	6.50349
p.Ile197Ser	0.795231	0.154454	-6.57122	3.41296
p.Ile197Thr	0.852353	0.244914	-1.56715	3.32308
p.Ile197Val	0.845568	0.130328	-0.797125	1.45645
p.Phe198Ile	0.615882	0.112283	13.6648	1.83049
p.Phe198Leu	0.742998	0.176093	2.68193	1.22399
p.Phe198Val	0.985578	0.278244	7.43326	0.190743
p.Phe198Tyr	0.715446	0.124888	-14.8036	2.46331
p.Ala199Gly	0.926183	0.400576	-21.4142	5.83688
p.Ala199Ser	0.721866	0.168376	-28.0802	1.5461
p.Ala199Thr	0.891599	0.503814	-13.7857	2.1565
p.Ala199Val	0.848184	0.297461	9.79442	1.61542
p.Thr200Ala	0.793514	0.11007	-5.9319	2.52615
p.Thr200Lys	0.799247	0.0959359	-33.4029	3.18016
p.Thr200Met	0.409823	0.149835	25.236	1.12273
p.Thr200Pro	0.574758	0.119454	-1.04038	4.44903
p.Thr200Arg	0.606371	0.0617882	-9.40584	2.81349
p.Thr200Ser	0.928207	0.204283	-6.55339	5.39552
p.Ser201Ala	1.11272	0.186347	15.1733	1.57265
p.Ser201Phe	0.8385	0.329775	34.5675	2.04322
p.Ser201Pro	0.881629	0.304939	-5.83034	6.12797
p.Ser201Thr	0.674111	0.236503	-4.55122	2.9047
p.Ser201Tyr	0.878755	0.328692	0.448958	2.9372
p.Ala202Glu	0.31134	0.152082	-18.5131	4.47723
p.Ala202Gly	0.715566	0.0987194	-7.54572	3.36149
p.Ala202Pro	0.548891	0.0940406	-15.5061	3.36382
p.Ala202Ser	1.10759	0.272081	-5.23192	1.59672
p.Ala202Thr	0.629846	0.2744	-8.05962	3.08541
p.Ala202Val	0.660699	0.0593967	4.38512	3.87439
p.Leu203Met	0.745508	0.169126	-2.37293	3.72918
p.Leu203Pro	0.845354	0.287697	10.2824	1.64177
p.Leu203Gln	0.669133	0.293052	-4.74754	2.70831
p.Leu203Val	1.01568	0.312283	-3.29261	3.44966
p.Arg204Cys	1.14038	0.338877	29.8646	1.41894
p.Arg204Gly	0.976515	0.702206	3.15504	2.67519
p.Arg204His	0.289052	0.125216	-6.72271	0.377832
p.Arg204Leu	0.51959	0.0985921	32.949	1.86859
p.Arg204Pro	0.873474	0.120982	-6.8493	3.81159
p.Arg204Ser	0.69891	0.0879761	-2.90145	1.63937
p.Ser205Cys	0.598036	0.290431	3.41825	2.83145
p.Ser205Gly	1.14132	0.480779	-4.25468	2.01977
p.Ser205Ile	0.770819	0.110569	-5.78623	5.29454
p.Ser205Asn	0.940139	0.338426	-7.74372	7.33617
p.Ser205Thr	1.40064	0.636184	0.0101608	2.06795
p.Met206Ile	0.61926	0.0813777	9.94964	1.33631
p.Met206Leu	0.86184	0.305107	3.19088	2.4091
p.Met206Arg	0.315919	0.0948518	22.7083	2.64834
p.Met206Thr	0.948351	0.156876	13.3749	2.57115
p.Met206Val	0.729282	0.367692	20.1961	0.737171
p.Arg207His	0.326545	0.0983935	-5.23875	3.12265
p.Arg207Ser	0.421967	0.0519866	-7.86322	4.64577
p.Phe208Cys	0.83929	0.208021	15.1246	2.13184
p.Phe208Ile	1.32854	0.340313	3.65522	1.68998
p.Phe208Leu	0.961798	0.215146	2.99694	1.74996
p.Phe208Ser	0.906785	0.3981	21.0823	2.65683
p.Phe208Val	1.08968	0.314604	9.00418	1.12915
p.Phe208Tyr	0.719022	0.204535	17.8967	1.45233
p.Leu209Met	1.84167	0.314938	4.78682	2.14524
p.Leu209Pro	0.815827	0.198027	21.0711	1.40454
p.Leu209Gln	0.971323	0.178851	21.8459	4.83242
p.Leu209Val	0.888107	0.146174	-2.93815	2.62585
p.Gln210Glu	0.849212	0.128543	33.8654	2.67734
p.Gln210His	0.960672	0.198625	2.90927	2.3776
p.Gln210Lys	1.28096	0.221271	31.9896	1.06979
p.Gln210Leu	1.2894	0.222301	-17.4127	3.20715
p.Gln210Pro	1.52468	0.154992	0.375009	1.18935
p.Ile211Phe	0.536264	0.0943324	19.5956	1.2411
p.Ile211Leu	0.672439	0.143621	2.78993	3.26377
p.Ile211Met	1.10704	0.362459	1.10977	5.85075
p.Ile211Asn	0.321039	0.0697274	37.7505	0.79704
p.Ile211Ser	0.646921	0.143784	37.9864	0.308354
p.Ile211Thr	0.708942	0.0647913	33.0682	2.58002
p.Ile211Val	1.03185	0.164276	15.0708	0.771958
p.Leu212Met	1.0981	0.155133	4.77813	1.4859
p.Leu212Pro	0.318471	0.0715687	36.9375	0.863823
p.Leu212Gln	0.915902	0.139226	38.5087	0.396769
p.Leu212Val	1.45617	0.273248	1.66959	1.75132
p.Arg213Cys	0.783121	0.280469	33.0874	2.23731
p.Arg213Gly	0.575926	0.0883721	37.8718	0.600504
p.Arg213His	1.03741	0.311408	34.412	1.11516
p.Arg213Leu	0.465466	0.183927	36.3691	2.70453
p.Arg213Ser	1.07119	0.164249	20.2559	3.17149
p.Met214Ile	1.1227	0.215558	4.70111	0.658005
p.Met214Leu	1.44336	0.171578	-4.10313	1.7129
p.Met214Thr	0.844972	0.216025	37.9659	0.410298
p.Met214Val	0.999299	0.0643465	17.6657	2.10578
p.Val215Ala	0.88775	0.153051	-1.11949	2.69002
p.Val215Gly	1.31159	0.616975	32.7946	2.04153
p.Val215Leu	1.02454	0.304932	7.08683	1.18997
p.Val215Met	1.32692	0.451134	8.5369	2.6522
p.Arg216Cys	0.69916	0.103879	10.6686	1.32105
p.Arg216Gly	1.06995	0.13387	-0.316086	2.92849
p.Arg216His	0.917479	0.226384	26.3203	4.51775
p.Arg216Leu	1.28082	0.203278	3.01083	3.45847
p.Arg216Pro	0.511482	0.068075	21.617	2.01106
p.Arg216Ser	0.776211	0.156345	-25.7101	2.17247
p.Met217Ile	1.05067	0.144817	-6.36247	0.113173
p.Met217Leu	1.21747	0.148187	-2.62361	2.23631
p.Met217Thr	0.633204	0.123472	25.3522	2.00081
p.Met217Val	0.678118	0.183072	-1.60291	0.61001
p.Asp218Ala	0.495591	0.0758214	12.2949	3.38483
p.Asp218Glu	2.30976	0.295349	16.7095	1.09962
p.Asp218Gly	0.709352	0.0716297	29.1192	6.15806
p.Asp218Asn	0.404383	0.153587	30.2482	2.25803
p.Asp218Val	0.262108	0.0383539	1.58307	4.70122
p.Asp218Tyr	0.672849	0.10291	3.38084	4.46835
p.Arg219Cys	1.96955	0.35431	1.35721	2.91549
p.Arg219Gly	0.594816	0.155906	30.4513	2.45465
p.Arg219His	0.589403	0.0967592	12.4184	3.10145
p.Arg219Leu	1.63688	0.17612	13.7455	1.64971
p.Arg219Pro	4.09359	0.716991	-2.89108	1.48601
p.Arg219Ser	0.756194	0.0508587	6.59121	3.28756
p.Arg220Cys	1.33255	0.522	10.7379	1.41888
p.Arg220Gly	0.789713	0.187527	6.28561	2.43391
p.Arg220His	1.11804	0.0867473	6.62486	1.83243
p.Arg220Leu	0.529793	0.131212	1.25584	4.36305
p.Arg220Ser	1.08532	0.196076	-6.89783	3.15026
p.Gly221Ala	0.559144	0.138269	1.25714	2.25713
p.Gly221Cys	0.964041	0.438835	10.8913	1.21943
p.Gly221Ser	0.634071	0.277779	24.0695	2.35235
p.Gly222Ala	0.335521	0.110284	-16.2365	3.39862
p.Gly222Asp	0.314883	0.0528981	-6.54344	2.31099
p.Gly222Arg	0.702594	0.168326	-6.26385	2.82248
p.Gly222Ser	1.00471	0.51702	2.84885	1.34944
p.Thr223Ala	2.5153	0.359689	10.9148	1.63697
p.Thr223Ile	1.07323	0.2676	35.9801	1.94459
p.Thr223Pro	1.4294	0.222802	35.5057	1.13329
p.Thr223Ser	1.1151	0.067924	12.1719	3.05752
p.Trp224Leu	0.97125	0.180474	25.5615	3.25412
p.Lys225Glu	1.01763	0.200854	23.3352	1.60404
p.Lys225Met	0.696671	0.224769	-1.20043	4.10695
p.Lys225Asn	1.2441	0.308729	13.6461	1.05734
p.Lys225Gln	0.888951	0.233314	14.0416	2.2314
p.Lys225Arg	1.12238	0.362791	7.38567	3.17877
p.Lys225Thr	1.12238	0.148149	15.4171	1.53327
p.Leu227Val	4.40663	0.632327	12.7985	0.974535
p.Gly228Ala	1.23383	0.3903	2.14036	1.03341
p.Gly228Cys	1.02355	0.221943	8.34734	1.15899
p.Gly228Arg	0.772131	0.0905495	16.6184	3.6119
p.Gly228Ser	1.34022	0.310349	0.502825	1.85707
p.Gly228Val	1.24576	0.0632488	-2.77231	4.86641
p.Ser229Ala	1.24645	0.331474	5.25522	2.67802
p.Ser229Leu	0.929398	0.301965	-4.37587	0.685216
p.Val230Ala	0.370933	0.133292	-9.08234	2.4018
p.Val231Phe	0.684114	0.196215	15.2878	4.53244
p.Val231Ile	1.19908	0.202347	-3.43852	4.05454
p.Val231Leu	3.73963	0.403576	3.55067	1.21614
p.Tyr232Cys	1.10227	0.302791	6.49308	2.07739
p.Tyr232Asp	0.461204	0.223622	9.84968	2.49262
p.Tyr232Phe	0.739042	0.206618	9.02873	2.43919
p.Tyr232His	1.09102	0.0582082	2.4229	3.66109
p.Tyr232Asn	0.847482	0.305666	12.8926	2.75992
p.Tyr232Ser	0.666733	0.128313	4.05066	1.70032
p.Ala233Glu	0.469313	0.0774114	2.81583	1.8121
p.Ala233Gly	1.03025	0.312987	-0.530051	2.33156
p.Ala233Ser	0.772444	0.17744	-4.79085	3.01161
p.Ala233Thr	1.37053	0.46633	-6.53813	2.61186
p.Ala233Val	1.14975	0.24561	3.00141	3.56767
p.His234Asn	1.05213	0.356758	-1.11319	3.20036
p.Ser235Cys	0.696691	0.151028	1.76833	2.51891
p.Ser235Asn	0.676474	0.126047	1.14281	3.80332
p.Ser235Arg	0.604411	0.194668	-11.6908	2.65196
p.Lys236Glu	1.19304	0.418436	9.11035	2.50534
p.Lys236Gln	0.954076	0.145621	8.8713	2.36894
p.Lys236Arg	1.2495	0.709775	14.2152	1.22381
p.Lys236Thr	0.715072	0.3034	21.7317	5.32436
p.Leu238Met	0.922047	0.292388	30.1459	1.51611
p.Ile239Phe	0.657821	0.177684	4.98622	2.33871
p.Ile239Leu	0.67682	0.225702	7.61819	3.23613
p.Ile239Met	0.788557	0.254922	-0.868854	2.61584
p.Ile239Ser	0.654419	0.0975103	16.1281	1.06718
p.Ile239Thr	0.816349	0.13876	6.75448	2.65538
p.Ile239Val	0.852105	0.132278	1.60925	2.85805
p.Thr240Ala	0.599649	0.105168	7.5212	3.35954
p.Thr240Ile	0.356276	0.179363	24.1632	9.86125
p.Thr240Asn	0.311089	0.0822205	31.3064	2.39646
p.Thr240Pro	0.610838	0.115771	27.8097	1.82743
p.Thr240Ser	1.23364	0.452026	1.67454	3.99053
p.Ala241Asp	0.768626	0.211381	-5.26438	0.994623
p.Ala241Ser	1.12129	0.362596	4.95898	2.3688
p.Ala241Thr	0.748091	0.233189	9.56748	0.497703
p.Trp242Cys	2.76101	0.491967	-3.98048	2.9412
p.Trp242Gly	1.64125	0.213056	-7.21138	3.98964
p.Trp242Leu	2.48356	0.43033	-4.74141	1.23713
p.Trp242Ser	1.33585	0.156173	-0.708778	2.09609
p.Tyr243Phe	0.492559	0.120728	21.4041	3.93595
p.Tyr243His	0.864368	0.542934	23.7126	2.00751
p.Ile244Phe	0.695529	0.14052	0.350127	2.27225
p.Ile244Leu	0.857444	0.0799276	1.33477	3.1446
p.Ile244Met	0.687942	0.35628	5.06858	1.70867
p.Gly245Ala	1.69757	0.157822	-13.2463	3.47184
p.Gly245Glu	0.783312	0.196134	-9.35687	3.0337
p.Gly245Val	1.52601	0.255219	7.11425	1.71606
p.Gly245Trp	0.744329	0.236248	32.0294	2.10676
p.Phe246Val	0.799814	0.323817	4.01028	4.83998
p.Leu247Met	1.53622	0.333932	8.02187	2.01084
p.Leu247Val	1.6745	0.206188	2.0022	1.78844
p.Val248Ala	0.711165	0.0360173	-1.99694	3.49255
p.Val248Leu	0.502566	0.0780411	1.14529	0.963809
p.Val248Met	0.879127	0.0372524	5.85345	1.20391
p.Leu249Ile	0.628751	0.25793	2.41036	2.91646
p.Leu249Val	0.816392	0.195488	22.8152	3.89413
p.Ile250Phe	1.02394	0.518821	5.98545	1.37009
p.Ile250Leu	0.77026	0.128383	-0.611318	4.40174
p.Ile250Met	0.688119	0.0700188	-4.92441	2.55618
p.Ile250Val	0.899439	0.361863	-5.80316	5.27815
p.Phe251Cys	0.933533	0.362782	6.28149	4.46934
p.Phe251Ile	1.05393	0.274773	4.5332	1.49835
p.Phe251Leu	0.957279	0.124205	0.67169	3.14003
p.Phe251Ser	1.03394	0.191265	-6.21271	1.41996
p.Phe251Tyr	0.825148	0.094349	24.9666	3.67417
p.Ala252Gly	1.15503	0.194169	-5.18837	2.9223
p.Ala252Ser	0.602674	0.144034	0.29046	4.13657
p.Ala252Thr	0.67108	0.210794	7.70477	2.45069
p.Ser253Ala	0.463891	0.163908	2.86411	2.66729
p.Ser253Cys	1.03018	0.227141	2.74635	1.9497
p.Ser253Thr	0.699655	0.177332	15.6684	1.20856
p.Phe254Leu	0.304997	0.0452594	-7.62693	2.69119
p.Phe254Ser	0.664955	0.105162	21.3993	4.65258
p.Phe254Val	0.299106	0.0692474	31.1149	2.33912
p.Phe254Tyr	0.66144	0.199558	-2.39451	3.13167
p.Leu255Met	0.830033	0.275368	-1.00394	2.35977
p.Leu255Val	1.06807	0.344619	2.79892	5.44968
p.Val256Leu	0.737483	0.130083	5.4035	2.21951
p.Tyr257Phe	0.744263	0.111113	14.2362	1.7954
p.Tyr257His	0.721715	0.331991	-2.21278	3.80752
p.Leu258Met	1.03346	0.42629	-1.80578	4.24552
p.Leu258Gln	0.831211	0.0602295	5.56396	2.40004
p.Leu258Val	0.804268	0.433044	4.09495	3.1928
p.Ala259Ser	0.594579	0.131662	3.84564	4.62515
p.Ala259Thr	0.381686	0.168233	2.74922	2.40595
p.Ala259Val	1.05017	0.243676	7.13755	2.6874
p.Lys261Glu	0.383713	0.127097	-3.50658	2.43508
p.Lys261Asn	0.815845	0.138454	-4.59305	1.64886
p.Lys261Gln	0.337663	0.0777126	-7.70569	1.60059
p.Lys261Thr	0.942363	0.11083	-10.2919	1.38046
p.Asp262Glu	0.90468	0.249635	0.236978	2.0017
p.Asp262Gly	0.826068	0.310688	2.814	3.02621
p.Asp262His	0.665641	0.0896088	-1.68685	3.19268
p.Asp262Asn	1.0214	0.353164	3.47329	4.76914
p.Ala263Asp	0.693326	0.0845902	-5.48119	2.10298
p.Ala263Gly	0.688556	0.10186	2.23839	0.630107
p.Ala263Ser	0.943075	0.035152	-1.27434	3.33813
p.Ala263Thr	1.22038	0.158719	3.61019	1.9142
p.Ala263Val	0.93327	0.246132	3.59408	2.66148
p.Asn264Asp	0.254099	0.0851017	2.21547	3.81921
p.Ser265Ala	1.32157	0.455161	5.58767	1.40097
p.Ser265Pro	1.15131	0.245896	-2.71363	2.13875
p.Ser265Thr	0.683875	0.130734	3.94918	0.950222
p.Ser265Tyr	0.648324	0.069642	1.58881	3.48965
p.Asp266Glu	0.341668	0.113173	3.4874	4.60208
p.Asp266Gly	0.823196	0.303577	-2.91227	1.43686
p.Asp266His	0.261441	0.121654	-1.37576	3.73024
p.Asp266Asn	0.983131	0.381524	-5.22715	1.14951
p.Ser268Ala	0.886091	0.256885	4.73458	2.14209
p.Ser268Pro	0.760232	0.240301	2.23345	2.64847
p.Ser268Thr	0.68096	0.232523	0.0706795	3.25948
p.Ser268Tyr	1.06826	0.473871	7.52383	1.54481
p.Ser269Cys	0.842141	0.234965	24.7336	3.59628
p.Ser269Thr	0.707809	0.149696	0.269195	2.30525
p.Tyr270Phe	0.84515	0.245406	5.40571	1.73365
p.Ala271Gly	1.72737	0.305285	12.945	2.50317
p.Ala271Ser	0.638423	0.119144	13.8749	3.95361
p.Ala271Thr	0.705513	0.195226	11.0108	0.813952
p.Ala271Val	0.542803	0.087061	16.1071	1.09806
p.Asp272Ala	0.283405	0.122173	12.5104	2.62812
p.Asp272Glu	0.97462	0.288439	-0.850484	2.42676
p.Asp272Asn	0.293007	0.087267	5.04313	1.31367
p.Ser273Ala	0.633769	0.14445	-3.25633	4.852
p.Leu274Ile	0.562435	0.0612994	-1.44575	4.54057
p.Gly277Ala	0.743854	0.297492	1.60468	2.36645
p.Thr278Ala	0.639079	0.116796	0.0231278	3.09492
p.Thr278Met	0.748506	0.263921	12.2916	1.67164
p.Thr278Ser	0.272007	0.0898844	2.16814	3.66143
p.Thr280Ser	0.599192	0.104255	4.58875	3.2285
p.Leu281Phe	0.718356	0.158805	-0.897407	2.63267
p.Leu281Met	0.866946	0.0747357	1.79666	4.1969
p.Thr282Ser	0.258709	0.0605731	0.917181	4.15583
p.Ile284Val	0.8766	0.0988976	1.43103	2.19399
p.Lys289Met	1.09812	0.27954	-1.86782	2.63365
p.Lys289Thr	0.953129	0.211941	6.10976	3.49477
p.Thr290Ile	0.734332	0.21788	2.50256	1.18118
p.Thr290Ser	0.720383	0.168499	16.1728	6.11284
p.His292Asp	0.802819	0.196175	-0.799322	2.0361
p.His292Leu	0.817046	0.232971	1.92143	2.03527
p.His292Asn	0.752177	0.168285	-2.87894	1.96382
p.His292Gln	0.910974	0.0578851	-5.19612	3.79731
p.His292Arg	0.883337	0.0859326	-1.28863	3.65495
p.His292Tyr	0.826129	0.318398	-2.01474	3.3259
p.Trp294Cys	1.04989	0.374342	10.6543	2.67828
p.Trp294Gly	0.641572	0.00935593	0.18124	1.91613
p.Trp294Leu	1.07228	0.268279	-3.04826	2.87909
p.Trp294Arg	0.603295	0.0736411	7.41088	4.02786
p.Trp294Ser	1.36167	0.216735	-2.37315	2.43337
p.Leu295Met	0.756789	0.175763	-5.39913	2.59395
p.Leu295Pro	0.512767	0.126779	17.5162	5.38198
p.Leu295Arg	0.282023	0.0444453	7.03486	2.57787
p.Leu295Val	0.675037	0.20408	-4.98289	2.72238
p.Arg297Lys	1.47152	0.198295	2.23348	1.57709
p.Arg297Met	0.640737	0.111423	-0.759666	2.68051
p.Val298Ala	0.966498	0.0567907	0.217632	1.86674
p.Val298Phe	0.932604	0.23341	5.54443	2.92243
p.Val298Ile	1.52111	0.259391	4.15519	1.99105
p.Val298Leu	1.14067	0.27765	0.765077	2.15556
p.Leu299Met	1.23951	0.387624	5.0442	1.15227
p.Leu299Val	0.660152	0.114161	6.78199	1.31042
p.Ala300Gly	1.31457	0.360848	-1.44943	2.6188
p.Ala300Ser	0.906052	0.170985	-3.21298	1.0552
p.Ala300Thr	0.902246	0.29226	3.25487	2.16838
p.Ala301Gly	0.821099	0.0819216	2.75293	3.77933
p.Ala301Ser	1.04518	0.368229	-2.65771	4.64262
p.Ala301Thr	0.76874	0.189744	4.88135	4.9017
p.Ala301Val	1.47055	0.220647	0.616917	0.81663
p.Gly302Ala	1.03172	0.234268	-1.44246	3.12604
p.Gly302Cys	1.18856	0.246996	3.41341	2.46021
p.Gly302Ser	1.41797	0.235498	4.54142	0.506279
p.Gly302Val	1.32562	0.271483	-1.20799	5.74826
p.Phe303Cys	0.817422	0.176666	3.03898	4.37313
p.Phe303Ser	0.63962	0.206924	4.03778	3.42137
p.Ala304Gly	0.857344	0.254798	1.17151	1.66839
p.Ala304Ser	0.609839	0.0853325	1.68585	0.176627
p.Leu305Phe	1.08406	0.339089	6.36077	2.79183
p.Leu305Ile	0.663882	0.107051	-2.6814	2.73498
p.Leu305Val	0.750931	0.203405	-0.0667817	4.0334
p.Leu306Met	1.03547	0.41915	-3.42492	2.94946
p.Leu306Val	1.24811	0.552036	-1.58246	5.13463
p.Ile308Phe	1.15931	0.273389	-1.63119	3.03364
p.Ile308Leu	0.337048	0.0624659	2.7091	2.54486
p.Ile308Met	0.258956	0.0954966	3.49476	5.14972
p.Ile308Asn	0.625973	0.356886	-5.4213	1.47641
p.Ile308Ser	0.81952	0.282582	-1.09945	0.651275
p.Ile308Thr	0.964368	0.196583	3.93155	1.25472
p.Ile308Val	1.11092	0.10561	-1.68842	1.35597
p.Ser309Ala	1.44714	0.349242	2.61325	4.00305
p.Ser309Pro	1.22448	0.495234	-4.84189	1.47736
p.Phe310Ile	1.39458	0.243445	3.10928	3.32532
p.Phe310Leu	0.811019	0.123158	5.92046	2.49391
p.Phe310Ser	0.590231	0.112923	20.4496	2.56839
p.Phe310Val	1.50617	0.360162	13.7196	2.62656
p.Phe311Leu	0.785538	0.139995	1.87621	0.925311
p.Phe311Val	0.288652	0.0958693	23.8521	2.79485
p.Phe311Tyr	0.727583	0.321834	0.528566	1.56617
p.Ala312Gly	0.728246	0.0966761	-6.33857	3.29125
p.Ala312Pro	1.11943	0.19314	5.87621	2.9642
p.Ala312Ser	1.03419	0.0681855	-0.735944	0.0711386
p.Ala312Thr	0.25379	0.110588	-4.86239	4.08872
p.Leu313Met	0.878199	0.111847	-15.1088	1.631
p.Leu313Val	0.838884	0.303379	-14.9778	1.99427
p.Ala315Gly	1.13406	0.358963	3.06158	4.76588
p.Ala315Pro	0.964339	0.321832	3.88832	3.41066
p.Ala315Ser	0.870663	0.387595	2.10608	1.69651
p.Ala315Thr	1.2766	0.61464	3.49936	3.86587
p.Ile317Phe	0.9253	0.4218	4.03061	4.8188
p.Ile317Thr	0.705367	0.206989	-15.1076	1.75882
p.Ile317Val	1.23357	0.547677	-3.41694	5.10132
p.Gly319Ala	0.493205	0.227845	-3.09325	3.75393
p.Gly319Cys	0.451775	0.154726	-12.2988	7.08797
p.Gly319Ser	1.82941	0.259261	-20.721	2.53637
p.Ser320Thr	1.61905	0.446405	-1.7924	1.49236
p.Phe322Leu	0.975144	0.232074	7.97226	2.9803
p.Ala323Gly	1.11778	0.372793	-15.121	1.37662
p.Ala323Ser	1.8081	0.273097	-12.9722	1.0752
p.Leu324Met	1.13774	0.654244	-21.9	1.92047
p.Leu324Val	0.521873	0.137714	-20.3477	4.65359
p.Lys325Glu	1.93498	0.498013	1.35964	1.29788
p.Lys325Met	0.787362	0.183875	21.2674	2.25261
p.Lys325Gln	0.401893	0.219233	0.823552	4.66509
p.Lys325Thr	1.50538	0.514391	7.09395	0.917036
p.Val326Asp	1.01466	0.464313	-3.70562	1.30033
p.Val326Phe	0.826224	0.172046	-20.9706	3.95378
p.Val326Gly	0.859339	0.127685	5.09648	2.61052
p.Val326Ile	3.99906	0.832381	10.7974	1.14682
p.Val326Leu	0.904185	0.199844	-14.7729	1.28365
p.Gln327Glu	1.18326	0.333405	-4.59537	7.30526
p.Gln327Lys	1.0524	0.350532	-20.5535	2.86113
p.Gln327Pro	0.267188	0.131731	5.50298	5.29649
p.Gln327Arg	1.71307	0.315253	-9.77041	2.56428
p.Glu328Asp	0.903952	0.230019	-3.69212	2.73702
p.Glu328Lys	0.840697	0.086757	-5.28842	2.56758
p.Glu328Gln	0.881865	0.301679	0.0235255	2.32144
p.Gln329Glu	1.25582	0.616499	0.570406	1.86042
p.Gln329Leu	1.04564	0.384526	6.31055	3.14687
p.Gln329Pro	0.277364	0.0789896	-4.73651	8.21261
p.Gln329Arg	1.21908	0.372645	-4.93721	2.49785
p.His330Asp	0.927387	0.293418	-3.00251	1.77362
p.His330Leu	0.965992	0.174174	-4.72672	6.75307
p.His330Asn	0.407156	0.159164	-2.73477	3.39311
p.His330Arg	0.991439	0.308874	-13.9442	3.14674
p.His330Tyr	0.285861	0.0557872	-2.45534	3.0647
p.Gln332Glu	0.93528	0.501345	-3.58354	2.6502
p.Gln332Lys	0.863105	0.171925	-2.11234	4.13566
p.Gln332Arg	0.945796	0.19339	-9.98945	4.57806
p.Lys333Glu	0.828411	0.216902	12.0595	0.475971
p.Lys333Arg	0.845234	0.235635	0.742479	4.22542
p.His334Tyr	1.04162	0.465849	-4.57766	4.67112
p.Phe335Ile	1.08994	0.380873	-2.84032	2.93646
p.Phe335Leu	1.05655	0.579772	-0.578963	3.32366
p.Arg339Lys	1.00288	0.265006	-1.491	2.50046
p.Arg339Met	1.29653	0.539431	5.10907	3.03452
p.Arg339Thr	0.900292	0.256664	-4.19321	7.33097
p.Met340Ile	0.941475	0.191104	-4.91875	2.40436
p.Met340Lys	0.969841	0.432754	-6.35444	4.66424
p.Met340Leu	0.775236	0.266167	3.27539	1.19969
p.Met340Arg	0.980902	0.441031	0.422295	3.41604
p.Met340Thr	1.09067	0.426716	2.60261	2.49891
p.Met340Val	0.713592	0.348286	-6.07973	0.820592
p.Pro341Ala	0.353566	0.0826705	-13.7386	5.09203
p.Pro341Leu	0.88806	0.197229	-10.7308	3.79421
p.Pro341Gln	0.380353	0.10599	-13.6789	5.8631
p.Pro341Arg	0.271494	0.0552838	-22.0629	3.33184
p.Pro341Ser	0.252519	0.0746393	-30.266	2.92576
p.Pro341Thr	0.916969	0.190731	-7.01551	4.14041
p.Ala342Gly	0.356011	0.0442006	8.82849	1.46997
p.Ala343Gly	0.914065	0.172061	-0.00229336	1.86077
p.Ala343Ser	0.914513	0.26986	3.83663	1.33743
p.Ala343Thr	0.789124	0.110352	-0.104248	3.29292
p.Ala343Val	1.09573	0.379048	1.31346	2.65165
p.Asn344Asp	0.765845	0.199554	-5.31917	3.90063
p.Asn344Lys	0.862835	0.155843	-3.16413	1.83196
p.Asn344Ser	0.763868	0.122934	-4.1091	5.59041
p.Asn344Thr	0.906339	0.0237893	-3.00381	4.09705
p.Leu345Phe	0.805784	0.237137	-2.36681	1.48068
p.Leu345Ile	0.901207	0.124825	4.21185	4.05417
p.Leu345Arg	0.810973	0.180256	-6.00947	4.90998
p.Leu345Val	0.761349	0.0711147	1.8438	3.02481
p.Ile346Leu	1.10561	0.352546	-7.3758	0.120107
p.Ile346Met	1.25935	0.299928	3.69402	2.12017
p.Ile346Val	0.503704	0.171713	2.83294	2.08574
p.Gln347Glu	0.902281	0.211419	5.4319	3.11449
p.Gln347His	0.852178	0.315726	1.43718	1.26556
p.Gln347Lys	0.984405	0.20788	-7.83536	5.35999
p.Gln347Leu	1.2031	0.262955	0.91295	1.68795
p.Gln347Arg	1.02009	0.55732	-3.97544	3.18562
p.Ala348Asp	1.06238	0.295498	-1.5666	4.05275
p.Ala348Gly	0.793224	0.186363	2.21488	1.84332
p.Ala348Ser	1.09879	0.109486	-4.2944	1.03623
p.Ala348Thr	0.768222	0.286359	-0.966178	2.15474
p.Ala348Val	0.857976	0.178617	-1.4085	4.16645
p.Ala349Gly	0.971512	0.456719	1.79179	0.573077
p.Ala349Ser	1.1701	0.319807	-0.769231	2.82576
p.Ala349Thr	1.1859	0.259162	-2.05713	2.04608
p.Ala349Val	0.920123	0.265864	2.41731	1.69087
p.Arg351His	0.767933	0.141399	1.69376	2.76117
p.Leu352Met	1.24681	0.222703	-0.826515	3.87675
p.Leu352Gln	0.734042	0.105556	7.48189	2.86387
p.Leu352Arg	0.852535	0.0795605	1.83596	3.08394
p.Leu352Val	0.816653	0.17204	2.79434	7.59524
p.Tyr353Cys	0.889604	0.12752	2.56869	1.36146
p.Tyr353Phe	1.02188	0.321259	2.16055	3.10864
p.Tyr353His	1.0344	0.285892	8.27503	3.98733
p.Tyr353Asn	1.03996	0.297654	4.0794	6.05331
p.Tyr353Ser	1.01775	0.127581	-2.5606	3.43635
p.Ser354Ala	0.253064	0.0395256	25.03	4.31589
p.Ser354Cys	0.972244	0.258601	-2.03843	3.5592
p.Ser354Thr	1.1323	0.275676	1.71935	3.02493
p.Thr355Ala	1.10968	0.58235	-0.190426	5.38521
p.Thr355Ile	0.261575	0.067842	14.6337	0
p.Thr355Asn	0.393431	0.0848302	2.09927	7.51951
p.Thr355Pro	1.01741	0.0255455	4.62915	2.23164
p.Thr355Ser	0.719778	0.117232	-2.45733	5.16772
p.Asp356Glu	1.16975	0.522634	1.34868	3.59043
p.Asp356His	0.830855	0.285167	3.97394	0.65934
p.Asp356Asn	0.890067	0.116044	3.67038	0.390957
p.Met357Ile	0.847834	0.273995	-1.03683	4.6508
p.Met357Lys	0.932753	0.217088	1.47697	3.42303
p.Met357Leu	1.07307	0.542178	-6.11631	3.86845
p.Met357Arg	0.94908	0.261133	1.46809	3.12099
p.Met357Thr	0.823388	0.174395	0.284248	1.05947
p.Met357Val	0.847658	0.13578	0.585351	4.44291
p.Ser358Cys	1.01894	0.331116	-0.922488	3.16725
p.Ser358Gly	0.879929	0.127358	3.36213	2.06582
p.Ser358Ile	0.908772	0.0546178	4.23737	0.755688
p.Ser358Asn	0.898097	0.10008	3.03542	5.64375
p.Ser358Arg	0.973152	0.384349	9.26558	2.28152
p.Ser358Thr	0.920997	0.0817163	1.14172	5.75327
p.Arg359Gly	0.914674	0.341445	-2.53037	1.99271
p.Arg359Leu	1.23715	0.188834	6.13125	2.36901
p.Arg359Pro	1.25972	0.0838556	2.46328	1.58834
p.Arg359Gln	0.806946	0.136566	-0.638418	1.32181
p.Arg359Trp	0.963532	0.138161	4.20705	2.03963
p.Ala360Asp	1.05355	0.308062	0.202389	3.0248
p.Ala360Gly	1.14124	0.205402	3.83249	2.46988
p.Ala360Pro	1.16408	0.438983	-0.102581	2.33572
p.Ala360Ser	0.861834	0.158391	3.26196	3.84735
p.Ala360Thr	1.01692	0.367333	0.92458	4.5449
p.Ala360Val	0.938012	0.145554	7.47691	4.73788
p.Tyr361Cys	1.16138	0.0918774	-3.03458	4.73393
p.Tyr361Asp	1.11225	0.48423	2.58807	1.85401
p.Tyr361Phe	0.780062	0.135568	-0.814204	4.3268
p.Tyr361His	1.07807	0.331979	1.54851	0.0516965
p.Tyr361Asn	0.80879	0.0826937	6.60144	1.4056
p.Tyr361Ser	0.983115	0.442999	0.324583	0.973237
p.Leu362Met	1.11883	0.229338	4.25761	4.349
p.Leu362Pro	0.294511	0.0985062	-6.10219	1.18152
p.Leu362Arg	1.0556	0.366723	-2.74621	2.81111
p.Leu362Val	1.06159	0.296187	-0.519266	4.46811
p.Thr363Ala	0.872324	0.198544	-1.84746	2.12858
p.Thr363Ile	1.067	0.273659	-4.49878	8.88475
p.Thr363Lys	0.868752	0.126058	-2.77925	10.8922
p.Thr363Pro	0.920874	0.30034	-2.93798	4.25025
p.Thr363Arg	0.981427	0.294316	1.34702	3.0707
p.Thr363Ser	0.983152	0.350187	-3.18979	2.16985
p.Ala364Asp	1.06793	0.294447	-2.51154	0.507757
p.Ala364Gly	0.979946	0.390313	3.26985	2.10797
p.Ala364Pro	0.974909	0.326823	-10.1507	3.36181
p.Ala364Ser	0.957371	0.355818	-7.96934	1.94772
p.Ala364Thr	0.813683	0.110766	-3.11029	2.89861
p.Thr365Ala	0.762963	0.152282	-5.1397	0.425694
p.Thr365Asn	0.916119	0.193173	-3.78936	1.99895
p.Thr365Pro	0.821396	0.0672069	-5.25106	0.88861
p.Thr365Ser	0.819744	0.192226	2.70017	2.86407
p.Trp366Cys	0.876855	0.211259	-0.808006	1.16389
p.Trp366Gly	1.10115	0.389157	-7.15928	1.64981
p.Trp366Leu	0.9625	0.0484434	4.72744	6.10757
p.Trp366Arg	0.938078	0.124179	-3.46194	4.0096
p.Trp366Ser	0.890774	0.360782	-5.21172	6.5343
p.Tyr367Cys	1.11838	0.291447	0.331941	1.15289
p.Tyr367Asp	1.00808	0.131416	-2.65496	2.68019
p.Tyr367Phe	1.16883	0.35892	-10.5684	6.55874
p.Tyr367Asn	0.955315	0.220178	-0.302837	3.60292
p.Tyr367Ser	0.975578	0.3443	-4.41434	2.49099
p.Tyr368Cys	0.880087	0.237608	-5.23639	3.09455
p.Tyr368Asp	1.12001	0.263923	-2.59486	3.63703
p.Tyr368Phe	0.867735	0.227518	3.15672	2.47491
p.Tyr368His	0.825129	0.139671	-1.97317	2.51142
p.Tyr368Asn	1.02676	0.152867	-3.55798	4.42969
p.Tyr369Cys	1.23721	0.403658	4.81102	2.12943
p.Tyr369Asp	1.04465	0.247331	-2.12436	2.03347
p.Tyr369Phe	0.31766	0.0700935	1.41231	3.86607
p.Tyr369His	0.879397	0.191637	3.65144	3.98694
p.Tyr369Asn	1.15031	0.223059	2.63037	1.77876
p.Tyr369Ser	0.822657	0.16133	-1.92915	1.82785
p.Asp370Ala	0.958482	0.246034	-3.03474	4.1318
p.Asp370Glu	1.05625	0.255391	4.83207	1.71925
p.Asp370Gly	1.00782	0.486972	-0.874532	2.35071
p.Asp370His	0.830581	0.121725	3.82818	5.69972
p.Asp370Asn	1.14627	0.315616	5.43774	2.81033
p.Asp370Val	1.06706	0.324464	3.3819	3.55403
p.Asp370Tyr	0.91257	0.160404	-3.38074	2.71828
p.Ser371Cys	0.96556	0.152599	7.59599	0.498726
p.Ser371Gly	1.05296	0.232294	4.04813	2.15782
p.Ser371Ile	0.803027	0.106943	2.15715	0.718545
p.Ser371Asn	0.837451	0.198686	-5.68695	3.83758
p.Ser371Arg	3.13356	0.316361	-1.73429	1.38903
p.Ser371Thr	1.08343	0.15066	-1.99009	2.6684
p.Ile372Phe	1.02211	0.396346	5.30762	3.14173
p.Ile372Leu	0.980463	0.506983	-3.03342	6.74536
p.Ile372Met	1.06886	0.357106	-1.63772	1.66102
p.Ile372Asn	1.12542	0.276847	0.64659	2.49886
p.Ile372Ser	0.928715	0.433173	0.39237	0.0549123
p.Ile372Thr	1.03793	0.17693	5.69027	5.32988
p.Ile372Val	1.13343	0.255242	-0.272566	3.71536
p.Leu373Phe	1.08272	0.235239	0.950052	2.67155
p.Leu373His	1.06967	0.223332	6.71046	4.15736
p.Leu373Ile	0.893537	0.235836	-1.85785	6.98546
p.Leu373Pro	1.233	0.286292	-2.78362	1.38939
p.Leu373Arg	0.837577	0.239772	6.56691	3.23378
p.Leu373Val	1.01456	0.0660229	-1.28039	1.4814
p.Pro374Ala	0.918298	0.0439632	-3.49894	0.124772
p.Pro374Leu	1.16157	0.129617	-0.914279	3.94541
p.Pro374Gln	0.89065	0.157375	-2.55137	3.33033
p.Pro374Arg	1.21407	0.24677	3.05474	5.54293
p.Pro374Ser	0.886042	0.4285	7.62123	0.977823
p.Pro374Thr	1.05041	0.378661	-1.01869	0.77928
p.Ser375Ala	1.11863	0.341227	-1.04878	3.04189
p.Ser375Phe	0.9827	0.452963	1.59378	2.29409
p.Ser375Pro	0.854391	0.296202	8.79899	2.86557
p.Ser375Thr	0.884601	0.373137	0.139928	4.99963
p.Ser375Tyr	0.807117	0.0205291	3.30282	2.84097
p.Phe376Cys	0.882684	0.35899	-6.93103	3.43762
p.Phe376Ile	1.08783	0.425784	-6.53112	0.42714
p.Phe376Leu	1.19619	0.354154	-4.78587	0.077968
p.Phe376Ser	1.09709	0.0487951	8.19074	2.37419
p.Phe376Val	0.838786	0.297541	-6.80797	0.515495
p.Phe376Tyr	1.08873	0.294711	-4.95961	2.89175
p.Arg377Gly	1.13345	0.402198	-1.21981	0.610375
p.Arg377Ile	0.798533	0.0587042	-7.91551	4.97261
p.Arg377Lys	1.06731	0.361672	1.87267	1.05384
p.Arg377Ser	0.925489	0.0879384	2.69491	1.44157
p.Arg377Thr	1.14553	0.0548984	-4.50142	3.95987
p.Glu378Ala	0.962596	0.074945	12.1544	1.70188
p.Glu378Asp	1.02514	0.293602	-5.29305	2.95447
p.Glu378Gly	1.073	0.415312	-0.723171	0.585491
p.Glu378Lys	0.849722	0.171691	-3.50408	5.54078
p.Glu378Gln	1.15918	0.345587	2.16042	2.66685
p.Glu378Val	1.02469	0.269853	-3.88766	3.56706
p.Leu379Met	0.839145	0.216737	-1.50331	3.44804
p.Leu379Pro	0.836056	0.270453	-5.77376	1.70353
p.Leu379Gln	0.936339	0.211952	0.488879	4.14435
p.Leu379Arg	0.974997	0.429654	-2.84027	3.6606
p.Leu379Val	1.15788	0.404915	2.12683	2.1567
p.Ala380Asp	1.03648	0.309323	10.6173	1.96956
p.Ala380Gly	1.1161	0.194971	-4.95952	7.81501
p.Ala380Pro	1.02608	0.0989432	8.79792	0.697186
p.Ala380Ser	1.05319	0.273083	-1.14838	3.05914
p.Ala380Thr	0.882493	0.23436	0.0143117	2.19703
p.Ala380Val	0.992966	0.134576	7.64163	0.89274
p.Leu381Phe	0.986262	0.113864	1.54012	1.26378
p.Leu381His	1.21294	0.114744	8.53248	1.92925
p.Leu381Ile	1.10338	0.35096	-0.975187	1.64166
p.Leu381Pro	0.839578	0.39269	1.59609	0.888903
p.Leu381Val	0.760866	0.198744	6.51045	3.65627
p.Leu382Phe	1.10804	0.117666	0.0255022	2.06692
p.Leu382Met	0.874733	0.153424	-9.91552	10.3408
p.Leu382Ser	0.825717	0.255666	-6.56356	3.84965
p.Leu382Val	0.940411	0.305201	-1.33105	2.40467
p.Leu382Trp	1.33723	0.0955826	-0.483802	4.15594
p.Phe383Cys	0.971369	0.0380438	9.27738	1.58926
p.Phe383Ile	0.799332	0.361114	-6.59219	2.69314
p.Phe383Leu	0.985855	0.0873804	-6.18535	3.14268
p.Phe383Ser	1.11279	0.255963	-11.7635	6.02816
p.Phe383Val	0.861323	0.173941	-2.63628	4.4582
p.Phe383Tyr	1.18029	0.24096	-1.48956	2.83293
p.Glu384Ala	1.00519	0.40774	-2.86798	1.91383
p.Glu384Asp	0.997335	0.194059	2.29835	0.973404
p.Glu384Gly	0.865342	0.205639	-4.02882	2.14536
p.Glu384Lys	0.81891	0.219262	8.15411	1.62511
p.Glu384Gln	0.943375	0.228007	1.39792	4.46863
p.Glu384Val	1.02646	0.291588	3.73872	4.36392
p.His385Asp	1.3608	0.390169	-3.84917	1.38186
p.His385Leu	0.750923	0.0624423	0.122196	2.00158
p.His385Asn	1.12475	0.178544	0.338787	4.55385
p.His385Pro	1.02718	0.452354	-2.70836	5.63977
p.His385Gln	1.15746	0.271479	1.80537	1.97811
p.His385Tyr	0.955678	0.233936	-0.31258	1.78366
p.Val386Ala	1.09569	0.363102	5.09059	0.958764
p.Val386Glu	1.01649	0.163652	1.48536	2.95241
p.Val386Gly	1.04622	0.454342	0.0074464	3.95417
p.Val386Leu	0.786481	0.070848	4.8371	2.09398
p.Val386Met	0.839201	0.393533	-5.46142	2.995
p.Gln387Glu	1.04067	0.299305	6.97731	1.60257
p.Gln387His	0.830247	0.363336	1.72853	3.85987
p.Gln387Lys	0.98533	0.0880459	-0.0417337	2.89534
p.Gln387Leu	1.27728	0.0603331	-0.214003	2.88867
p.Gln387Pro	0.911595	0.106684	8.61548	1.42169
p.Gln387Arg	0.939541	0.146372	5.2515	0.732598
p.Arg388Gly	1.12843	0.0604753	0.47199	3.3529
p.Arg388Leu	1.05645	0.152438	6.31578	3.54909
p.Arg388Pro	0.895227	0.320349	5.94145	3.81722
p.Arg388Gln	0.860067	0.100552	3.04508	4.33827
p.Arg388Trp	0.816751	0.308806	2.25353	1.67845
p.Ala389Asp	1.07659	0.303886	8.23136	3.03037
p.Ala389Gly	0.864311	0.29603	-1.74721	5.19541
p.Ala389Pro	0.958001	0.197887	0.204334	3.69516
p.Ala389Ser	1.05605	0.314435	9.31685	2.53084
p.Ala389Thr	0.928498	0.147828	2.3274	3.36829
p.Ala389Val	0.908144	0.285891	3.11507	2.55023
p.Arg390Cys	0.934481	0.16573	1.0841	0.790518
p.Arg390Gly	0.784962	0.170425	0.512104	2.17554
p.Arg390His	0.811832	0.223332	-6.62408	3.12081
p.Arg390Leu	0.276197	0.0983091	3.25181	0.0836744
p.Arg390Pro	0.805056	0.17161	2.23342	4.55986
p.Arg390Ser	0.865399	0.339305	2.73938	4.19862
p.Asn391Asp	1.17978	0.341443	4.7011	2.32717
p.Asn391His	1.0128	0.449176	5.14358	1.77283
p.Asn391Ile	0.957397	0.112916	-1.70699	1.30505
p.Asn391Lys	1.2638	0.373625	2.54041	1.87803
p.Asn391Ser	0.880852	0.204294	1.02578	2.06885
p.Asn391Thr	0.945762	0.164534	-0.589105	3.81851
p.Asn391Tyr	1.20985	0.248659	1.43149	2.41325
p.Gly392Ala	0.949367	0.291796	-6.78566	1.4059
p.Gly392Glu	0.765404	0.0689477	-7.3681	0.787063
p.Gly392Arg	0.847833	0.104511	3.37014	4.24808
p.Gly392Val	0.836181	0.220948	-5.2789	4.77947
p.Gly392Trp	1.08549	0.333799	6.77929	4.76483
p.Gly393Ala	0.798226	0.0706409	-9.75506	2.86488
p.Gly393Cys	0.999367	0.299906	5.77461	1.40412
p.Gly393Asp	0.932692	0.43493	-6.05666	1.842
p.Gly393Arg	0.791543	0.14201	-2.41809	3.52556
p.Gly393Ser	1.06336	0.484814	3.1511	0.35271
p.Gly393Val	0.845725	0.101564	-9.90039	6.11311
p.Leu394Ile	0.994667	0.102942	-4.86947	7.91801
p.Leu394Pro	0.816667	0.231344	-2.65493	1.74753
p.Leu394Gln	1.14969	0.222293	5.80165	0.988443
p.Leu394Arg	1.02182	0.304298	1.04608	4.00535
p.Leu394Val	1.23784	0.421189	2.95992	4.04251
p.Arg395Gly	1.26442	0.11728	-4.35854	4.87526
p.Arg395Leu	0.797721	0.227506	8.82851	2.83409
p.Arg395Pro	1.15288	0.348384	1.28068	3.02378
p.Arg395Gln	1.18038	0.231791	4.63104	3.14547
p.Arg395Trp	0.85251	0.146546	1.13629	1.11643
p.Pro396Ala	1.14628	0.3879	-2.10454	4.9653
p.Pro396His	1.18209	0.193035	-4.28433	3.20776
p.Pro396Leu	0.915424	0.0413777	-6.5449	5.82062
p.Pro396Arg	0.856668	0.136262	0.866504	3.58588
p.Pro396Ser	0.779777	0.207817	-1.18323	1.71762
p.Pro396Thr	1.25134	0.277241	4.17966	0.549662
p.Leu397Met	0.837921	0.250337	5.63407	1.48087
p.Leu397Pro	1.31104	0.414478	-1.72574	2.6851
p.Leu397Gln	1.17643	0.3673	4.79942	1.67744
p.Leu397Arg	1.00588	0.163744	-0.900367	2.94293
p.Leu397Val	0.880241	0.0183314	-0.199666	3.90814
p.Glu398Ala	1.13943	0.431855	6.16869	3.60409
p.Glu398Asp	1.11363	0.2504	-0.70957	7.12774
p.Glu398Gly	0.768109	0.0351751	7.05034	4.04109
p.Glu398Lys	0.860772	0.139441	5.94799	0.103855
p.Glu398Gln	0.917251	0.350598	3.03746	4.86808
p.Glu398Val	1.12469	0.234212	5.03379	2.51457
p.Val399Ala	0.997702	0.32161	-5.03704	5.71675
p.Val399Glu	1.22187	0.349236	-1.30022	4.46539
p.Val399Gly	0.850374	0.038216	1.40063	1.41529
p.Val399Leu	1.33184	0.550095	3.92412	2.94289
p.Arg400Gly	0.880921	0.190922	1.40738	1.16675
p.Arg400Leu	0.965272	0.115512	4.23072	1.67224
p.Arg400Pro	1.07778	0.215961	9.6033	2.14901
p.Arg400Gln	0.950264	0.254995	1.90398	3.23936
p.Arg400Trp	0.825949	0.0665312	-5.35022	10.1324
p.Arg401Gly	0.885449	0.26976	-0.1616	5.81315
p.Arg401Leu	0.876724	0.157682	-9.60579	11.2708
p.Arg401Pro	1.17898	0.170514	-2.37548	3.3349
p.Arg401Gln	1.19548	0.393982	1.69662	1.61296
p.Arg401Trp	0.963015	0.181032	1.50946	0.909421
p.Ala402Glu	1.20877	0.369013	9.37748	3.17373
p.Ala402Gly	0.84242	0.218787	-0.282687	1.85915
p.Ala402Pro	1.24651	0.275556	-3.40924	6.75312
p.Ala402Ser	1.18282	0.402342	10.9905	2.87341
p.Ala402Thr	0.982237	0.211597	-4.51044	4.56189
p.Ala402Val	0.978726	0.161744	1.11542	2.48233
p.Pro403Ala	0.779755	0.070775	5.72565	3.9175
p.Pro403Leu	0.904138	0.147836	-2.06653	1.19133
p.Pro403Gln	0.932168	0.247087	2.55538	0.768274
p.Pro403Arg	1.3048	0.18211	-7.40877	2.75531
p.Pro403Ser	1.03817	0.353314	1.15506	1.05722
p.Pro403Thr	1.26151	0.398751	-3.08287	1.87913
p.Val404Ala	1.15812	0.220652	6.41286	3.82694
p.Val404Glu	0.876019	0.301673	0.0904216	3.69324
p.Val404Gly	1.1575	0.256921	3.28251	4.59673
p.Val404Ile	0.791269	0.0605316	-3.54327	8.68251
p.Val404Leu	1.0673	0.329562	-4.195	5.81771
p.Pro405Ala	1.26429	0.490596	-7.4984	2.73569
p.Pro405His	1.02945	0.0230924	-2.51698	4.01406
p.Pro405Leu	0.785151	0.191686	2.78525	3.76466
p.Pro405Arg	0.95634	0.320181	1.2394	2.98621
p.Pro405Ser	0.884918	0.0858753	-0.473802	0.248223
p.Pro405Thr	0.76102	0.141174	0.157689	1.32362
p.Asp406Ala	0.962465	0.160848	3.85896	2.3599
p.Asp406Glu	1.23177	0.0488833	-3.7953	2.34565
p.Asp406Gly	0.854791	0.19285	-4.15895	1.35548
p.Asp406His	0.976946	0.332684	1.2424	2.44075
p.Asp406Asn	0.921958	0.458088	2.40691	2.02153
p.Asp406Val	1.12945	0.213499	-0.525565	3.54723
p.Asp406Tyr	1.36526	0.331951	4.21889	1.41889
p.Gly407Ala	0.913535	0.421254	-3.66402	3.3457
p.Gly407Glu	1.11834	0.544078	6.43882	5.5514
p.Gly407Arg	0.967877	0.27351	1.00272	1.42716
p.Gly407Val	1.26488	0.26765	-1.12691	2.86125
p.Ala408Glu	1.05087	0.277569	0.456028	1.34675
p.Ala408Gly	0.763253	0.147117	-0.129664	1.50184
p.Ala408Pro	0.860898	0.190635	2.30176	2.20038
p.Ala408Ser	1.0945	0.26786	0.148978	3.82647
p.Ala408Thr	0.95429	0.311452	4.99235	3.20149
p.Ala408Val	0.976722	0.113599	2.71457	0.139304
p.Pro409Ala	1.22881	0.246266	2.23315	3.32016
p.Pro409His	1.20161	0.324585	-6.62726	3.70627
p.Pro409Leu	1.02469	0.386805	0.018241	3.56116
p.Pro409Arg	0.871912	0.401159	-0.929614	2.76405
p.Pro409Ser	1.0211	0.0646616	2.92554	2.82719
p.Pro409Thr	1.42897	0.512604	8.25011	2.85599
p.Ser410Ala	1.28709	0.21143	-6.86961	3.92037
p.Ser410Cys	0.864572	0.183886	4.74943	2.23074
p.Ser410Phe	1.08627	0.0987435	0.778707	1.20642
p.Ser410Pro	0.980955	0.16156	-3.37217	1.29067
p.Ser410Thr	0.981336	0.100143	-0.713859	2.71165
p.Ser410Tyr	0.996058	0.138259	-2.7608	3.30343
p.Arg411Cys	0.928973	0.258715	-1.83638	1.99505
p.Arg411Gly	0.910491	0.208596	2.85463	3.14732
p.Arg411His	0.638312	0.25459	-2.04164	1.29268
p.Arg411Leu	0.803669	0.170905	1.61703	1.13188
p.Arg411Pro	0.728677	0.179675	-6.82799	2.51431
p.Arg411Ser	1.16471	0.379476	0.731486	1.09047
p.Tyr412Cys	1.17163	0.274402	1.91959	3.40507
p.Tyr412Asp	1.0067	0.145891	-1.26672	2.12893
p.Tyr412Phe	1.07318	0.4603	2.2493	3.4024
p.Tyr412His	1.27267	0.376477	-0.372155	3.06564
p.Tyr412Asn	0.838659	0.216541	1.06198	2.31336
p.Tyr412Ser	1.02679	0.311935	5.91506	2.67771
p.Pro413Ala	0.735861	0.191531	7.36486	1.38591
p.Pro413Leu	0.899652	0.273479	-3.96316	3.19379
p.Pro413Gln	0.868647	0.0758947	3.04344	0.450384
p.Pro413Arg	1.29881	0.170792	0.0674255	4.37486
p.Pro413Ser	1.08033	0.125127	2.16603	1.6681
p.Pro413Thr	0.946684	0.218525	-7.68892	3.21777
p.Pro414Ala	1.40586	0.466584	-5.01812	0.939723
p.Pro414His	1.26816	0.251565	-0.0453661	1.89258
p.Pro414Leu	0.767648	0.150761	7.3893	1.95379
p.Pro414Arg	0.90392	0.13518	0.352432	0.830006
p.Pro414Ser	0.874313	0.177345	-5.50778	1.2228
p.Pro414Thr	1.17477	0.183712	0.045032	1.83624
p.Val415Ala	1.06561	0.191783	10.2547	1.61961
p.Val415Asp	1.02026	0.447449	-3.3747	3.52614
p.Val415Phe	1.29689	0.526656	-2.48751	2.89366
p.Val415Gly	1.07964	0.224629	6.10767	2.33826
p.Val415Ile	1.28095	0.415529	6.03697	2.08465
p.Val415Leu	0.989985	0.410495	-3.7201	6.25686
p.Ala416Asp	0.932842	0.227734	7.69849	2.61339
p.Ala416Gly	1.44982	0.422079	2.18454	1.33031
p.Ala416Pro	1.11172	0.147719	3.26712	1.54337
p.Ala416Ser	0.947605	0.0886784	-3.13934	2.31851
p.Ala416Thr	0.862847	0.275532	7.43	0.590844
p.Ala416Val	1.34674	0.442681	-3.14623	3.34722
p.Thr417Ala	0.709081	0.123713	2.34228	1.47276
p.Thr417Ile	1.20075	0.3193	3.44009	3.12187
p.Thr417Asn	1.02425	0.12166	3.78087	2.23434
p.Thr417Pro	0.808772	0.18415	0.878373	2.27659
p.Thr417Ser	1.11076	0.330619	-0.188165	3.64736
p.Cys418Phe	1.24879	0.243753	3.956	0.124693
p.Cys418Gly	0.634528	0.143805	-1.57212	0.530176
p.Cys418Arg	1.22171	0.610044	4.50909	2.61165
p.Cys418Ser	1.24251	0.163508	2.66578	4.5496
p.Cys418Trp	1.01439	0.278181	-0.00194483	1.39229
p.Cys418Tyr	1.00521	0.18795	-0.333002	3.12991
p.His419Asp	1.56386	0.412911	2.07232	4.83902
p.His419Leu	1.01915	0.0644327	-1.61459	3.16632
p.His419Asn	0.778405	0.136425	4.84597	3.33023
p.His419Pro	0.901919	0.212215	-4.85159	0.338634
p.His419Gln	0.98349	0.393076	-1.28907	1.48747
p.His419Arg	1.22168	0.157629	-2.07875	3.14536
p.His419Tyr	1.20576	0.242446	6.80661	1.11734
p.Arg420Gly	0.847237	0.313229	2.95869	2.17266
p.Arg420Leu	0.964592	0.204865	0.670057	3.42688
p.Arg420Pro	0.96194	0.254105	-2.28392	3.68635
p.Arg420Gln	0.990513	0.217513	4.66056	6.30608
p.Arg420Trp	1.07644	0.242629	-0.458842	1.93864
p.Pro421Ala	0.795829	0.0938503	-3.06564	3.13046
p.Pro421Leu	1.30789	0.384416	0.544426	2.15508
p.Pro421Gln	1.1462	0.256286	-1.73922	3.27651
p.Pro421Arg	1.30218	0.193271	-1.5489	5.28995
p.Pro421Ser	0.806341	0.0760363	-2.39145	0.462949
p.Pro421Thr	0.907723	0.128029	2.75722	2.24794
p.Gly422Ala	0.708329	0.17466	-9.2176	3.03962
p.Gly422Cys	0.727042	0.151722	1.40251	5.27971
p.Gly422Asp	0.970131	0.107355	2.82902	2.94441
p.Gly422Ser	0.794509	0.176345	0.857328	4.38006
p.Gly422Val	0.994402	0.218242	-7.46367	0.0730988
p.Ser423Cys	0.847906	0.0991659	-2.20577	4.09434
p.Ser423Gly	0.792618	0.0719456	1.12892	2.62262
p.Ser423Ile	0.851749	0.197282	-3.05549	2.98337
p.Ser423Asn	1.11955	0.133995	4.15063	1.95084
p.Ser423Arg	1.13915	0.261868	1.82335	2.20795
p.Ser423Thr	0.68707	0.0880832	-1.22525	1.48702
p.Thr424Ala	0.639136	0.0715819	3.81989	1.60582
p.Thr424Ile	1.11861	0.277195	-1.27916	2.53031
p.Thr424Asn	0.80628	0.241394	7.75031	1.6566
p.Thr424Pro	0.897174	0.0920145	8.11563	3.64642
p.Thr424Ser	1.13409	0.0590346	11.9254	2.71094
p.Ser425Ala	1.07706	0.162744	27.0424	1.73914
p.Ser425Cys	0.786624	0.100154	-3.65983	5.07386
p.Ser425Phe	0.996402	0.240437	2.75119	2.34072
p.Ser425Pro	1.16064	0.404292	-2.47929	2.94565
p.Ser425Thr	1.26971	0.321872	-1.84865	0.49613
p.Phe426Cys	1.26957	0.645606	-3.13388	3.94626
p.Phe426Ile	1.20607	0.448178	5.90395	3.68191
p.Phe426Leu	0.862586	0.0704604	-1.01201	0.931418
p.Phe426Ser	1.14739	0.185803	-2.61005	1.19542
p.Phe426Val	1.39821	0.413392	4.17616	1.88463
p.Phe426Tyr	0.93662	0.354893	2.42814	3.35863
p.Cys427Phe	0.63299	0.172763	-4.08889	1.11241
p.Cys427Gly	1.05633	0.341869	-1.74967	1.88943
p.Cys427Arg	1.3073	0.472915	-11.2763	0.784133
p.Cys427Ser	0.974886	0.169922	-0.510432	0.710302
p.Cys427Trp	0.783356	0.0727046	-0.645965	1.99962
p.Cys427Tyr	0.922787	0.237837	-1.00902	1.08749
p.Pro428Ala	1.31615	0.466223	6.52515	1.62065
p.Pro428His	0.972537	0.260225	6.80325	0.590031
p.Pro428Leu	1.03812	0.163876	4.49001	6.28445
p.Pro428Arg	0.826255	0.14541	-1.32767	2.32044
p.Pro428Ser	0.867199	0.120863	1.58862	3.74307
p.Pro428Thr	1.26566	0.237567	2.01941	1.56949
p.Gly429Ala	0.766902	0.221205	-0.958584	2.06801
p.Gly429Glu	1.0662	0.360939	-5.44621	0.392034
p.Gly429Arg	0.82834	0.0210941	-5.13334	0.483229
p.Gly429Val	1.12332	0.494048	5.19004	7.24622
p.Gly429Trp	0.78703	0.278559	4.9223	1.07923
p.Glu430Ala	1.18815	0.362332	-3.47032	2.56973
p.Glu430Asp	0.895285	0.15604	5.73142	2.60153
p.Glu430Gly	1.08368	0.135305	-2.38815	6.17318
p.Glu430Lys	0.771921	0.153807	-4.17421	3.06426
p.Glu430Gln	1.28506	0.503009	-8.73871	4.30114
p.Glu430Val	1.46231	0.352009	1.48803	2.99647
p.Ser431Cys	0.645	0.122108	-2.386	7.38965
p.Ser431Gly	1.4453	0.423562	3.89921	3.08839
p.Ser431Ile	1.04796	0.174117	3.67706	1.62647
p.Ser431Asn	0.733129	0.197037	3.96018	1.65063
p.Ser431Arg	1.44061	0.329482	-1.39208	1.70189
p.Ser431Thr	0.715672	0.126428	-0.65181	2.00353
p.Ser432Cys	1.33644	0.240486	4.54743	2.74241
p.Ser432Gly	1.06092	0.17361	3.09948	4.13933
p.Ser432Ile	1.41911	0.585723	1.43524	2.95401
p.Ser432Asn	0.971872	0.273608	4.59566	1.88048
p.Ser432Arg	1.40313	0.384284	-1.46874	5.72096
p.Ser432Thr	1.3813	0.43501	-2.21445	3.41357
p.Arg433Gly	0.783161	0.202596	-6.22346	2.7105
p.Arg433Leu	0.694799	0.182822	-1.36674	1.08341
p.Arg433Pro	1.34673	0.383922	0.60925	1.84409
p.Arg433Gln	0.760546	0.123952	2.5704	2.47291
p.Arg433Trp	0.76593	0.147964	1.98606	3.70498
p.Met434Ile	0.955442	0.158641	2.40437	1.59398
p.Met434Lys	1.46043	0.297487	-6.28383	4.0747
p.Met434Leu	1.05892	0.101159	6.50989	0.843368
p.Met434Arg	0.984701	0.172863	-4.82641	6.32968
p.Met434Thr	1.1193	0.340206	0.0490434	0.234618
p.Met434Val	0.981523	0.239778	0.108769	2.03276
p.Gly435Ala	0.790854	0.15931	-2.74553	2.9452
p.Gly435Cys	1.1732	0.304747	4.50028	0.690846
p.Gly435Asp	0.702248	0.20002	2.00792	2.48822
p.Gly435Arg	1.0528	0.174438	2.64101	3.10573
p.Gly435Ser	1.14569	0.332903	0.552856	2.86846
p.Gly435Val	0.807915	0.0769635	1.58313	3.05883
p.Ile436Phe	0.844654	0.0548445	2.55454	1.21863
p.Ile436Leu	1.32463	0.360577	6.45412	3.70688
p.Ile436Met	0.963448	0.109918	5.68677	2.00305
p.Ile436Asn	0.783424	0.0751655	5.77481	2.67167
p.Ile436Ser	1.0404	0.209261	-4.99783	1.64307
p.Ile436Thr	1.11971	0.164395	-0.574168	1.6337
p.Ile436Val	0.894621	0.262783	-0.902501	2.3384
p.Lys437Glu	1.02687	0.344048	8.12691	1.86011
p.Lys437Ile	0.749405	0.0691596	-8.16475	2.5255
p.Lys437Asn	0.688801	0.0936623	5.01148	2.42555
p.Lys437Gln	0.86619	0.267832	-5.68834	1.9196
p.Lys437Arg	1.01346	0.147	1.81026	0.688991
p.Lys437Thr	1.21298	0.256914	7.47787	2.03593
p.Asp438Ala	0.863387	0.129771	-3.94637	5.98789
p.Asp438Glu	1.32353	0.339923	1.547	4.3546
p.Asp438Gly	0.815228	0.165282	-3.12206	2.99323
p.Asp438His	0.630288	0.0716652	-0.734402	2.64141
p.Asp438Asn	1.15825	0.223264	10.5879	2.78971
p.Asp438Val	1.13806	0.226646	-1.73209	2.92835
p.Asp438Tyr	1.27128	0.304853	0.0328283	3.30663
p.Arg439Cys	0.715012	0.302339	-3.75995	1.29371
p.Arg439Gly	1.49556	0.320448	-1.18364	0.637729
p.Arg439His	1.15143	0.344781	-6.26359	0.347035
p.Arg439Leu	0.838067	0.156341	1.75788	2.54396
p.Arg439Pro	1.45505	0.457883	1.11172	6.00812
p.Arg439Ser	1.25391	0.379165	4.78967	0.542566
p.Ile440Leu	0.924903	0.347129	9.89255	1.38494
p.Ile440Met	1.25293	0.307524	-0.519175	5.3983
p.Ile440Asn	1.14602	0.437089	-7.28959	7.75229
p.Ile440Ser	1.09696	0.163448	-9.66249	3.91476
p.Ile440Thr	0.603081	0.00921684	-5.15244	1.28303
p.Ile440Val	1.3446	0.461998	-3.67577	1.76876
p.Arg441Cys	0.626482	0.111461	-9.29853	2.18771
p.Arg441Gly	1.08758	0.303873	1.26853	6.30477
p.Arg441His	0.740305	0.168712	5.8899	3.14708
p.Arg441Leu	0.620466	0.177329	-0.368574	1.93603
p.Arg441Pro	1.23292	0.35371	4.56998	4.80591
p.Arg441Ser	1.59187	0.217384	11.0125	1.61303
p.Met442Ile	0.851014	0.185578	3.42077	2.5807
p.Met442Lys	1.05994	0.266808	-9.51542	6.01698
p.Met442Leu	0.829829	0.160416	1.50864	1.18441
p.Met442Thr	0.708888	0.167426	3.07198	0.869617
p.Met442Val	0.673552	0.239297	6.885	2.50574
p.Gly443Ala	0.719624	0.129343	-5.73578	0.92512
p.Gly443Cys	1.2017	0.174311	-3.54116	1.8521
p.Gly443Asp	0.833579	0.166008	-6.61125	0.135371
p.Gly443Arg	1.29084	0.290941	-0.56248	1.54434
p.Gly443Ser	1.2955	0.1638	8.39823	2.18883
p.Gly443Val	1.48929	0.256857	0.940827	2.21477
p.Ser444Cys	0.990837	0.176982	-1.61399	2.83776
p.Ser444Gly	1.05733	0.254758	-9.60031	2.99872
p.Ser444Ile	1.26862	0.241939	-7.09368	1.83852
p.Ser444Asn	0.669436	0.140267	-1.28517	1.6176
p.Ser444Arg	0.991831	0.167909	0.220955	3.08368
p.Ser444Thr	0.645341	0.193598	-2.59824	2.71141
p.Ser445Ala	0.945375	0.323279	2.3926	3.01997
p.Ser445Cys	1.51619	0.225542	2.55585	1.63732
p.Ser445Phe	0.826851	0.150456	-9.94678	3.97323
p.Ser445Pro	0.801026	0.225534	-2.9036	6.01494
p.Ser445Thr	0.833698	0.149543	-4.09157	4.35936
p.Ser445Tyr	1.09432	0.143472	-0.355163	3.08566
p.Gln446Glu	1.12783	0.13189	-0.0487231	2.17261
p.Gln446His	1.20467	0.122089	-5.66583	5.08386
p.Gln446Lys	0.859368	0.153722	2.55263	3.55741
p.Gln446Pro	1.10546	0.25712	-10.7259	10.8633
p.Gln446Arg	0.886785	0.109873	-1.12895	6.10051
p.Arg447Gly	0.74683	0.17416	5.67197	3.7233
p.Arg447Leu	0.778974	0.107047	-1.68747	3.54265
p.Arg447Pro	1.36402	0.308561	1.87475	3.2954
p.Arg447Gln	0.722389	0.104715	-4.08652	2.88332
p.Arg447Trp	0.763367	0.10174	-2.64989	3.78509
p.Arg448Gly	0.792794	0.16915	-2.41257	5.51586
p.Arg448Pro	0.961745	0.12074	-2.26549	5.8016
p.Arg448Gln	0.847613	0.119716	7.53215	2.37764
p.Arg448Trp	0.775404	0.249726	5.97967	4.3537
p.Thr449Ala	0.971655	0.301622	-11.817	9.66614
p.Thr449Lys	1.60843	0.328346	-1.40139	4.56282
p.Thr449Met	0.89595	0.0704786	0.646136	2.79321
[truncated: 1,322 more rows]

## Sheet: Supplemental_Dataset_C
Supplemental_Dataset_C: Functional properties of co-expressing 915 current-reduced variants with WT
	Co-expression
Variant	Normalized current (Imut+wt/Iwt+wt, at +40 mV)	SEM (Imut+wt/Iwt+wt, at +40 mV)	Number of cells	Δ V1/2 (mV)	SEM (ΔV1/2)
p.Met1Ile	1.18431	0.260089	5	-7.43284	7.75336
p.Met1Lys	1.00651	0.10763	5	3.74849	2.46574
p.Met1Leu	1.38835	0.168618	4	2.1186	3.45103
p.Met1Arg	0.419751	0.0525756	6	-9.88296	6.44194
p.Met1Val	1.13585	0.211264	4	5.56848	7.87248
p.Leu9Arg	1.18451	0.219207	13	3.46936	2.02719
p.Pro13Arg	1.19862	0.339007	5	-2.96828	3.35018
p.Arg20Ser	1.02415	0.18563	4	7.61735	2.52555
p.Glu22Gly	1.01504	0.33199	5	0.199138	1.0086
p.Ala28Asp	1.03927	0.21457	10	-2.50331	2.3012
p.Gly34Val	1.15505	0.227981	5	-0.0865044	3.60345
p.Gly38Trp	1.05823	0.234474	9	1.879	2.61746
p.Ser41Phe	1.18127	0.210023	4	-19.094	4.31415
p.Arg43Ser	1.38556	0.32731	5	-14.3457	3.26815
p.Leu47Phe	0.768606	0.253455	8	-1.74591	2.54765
p.Leu48Pro	0.833996	0.179041	6	2.16142	2.47783
p.Gly49Ser	1.25469	0.343911	6	-5.51524	2.35026
p.Gly49Val	0.974898	0.187659	4	7.14408	0.934369
p.Ser50Cys	0.95076	0.204869	6	-2.96011	0.328847
p.Pro51Thr	0.87265	0.162385	6	8.09859	2.31497
p.Gly64Arg	1.33478	0.280182	5	4.31069	2.79142
p.Arg72Ser	0.914383	0.229858	7	-0.707372	4.22219
p.Tyr80Asn	1.06629	0.153102	4	-0.646052	1.05198
p.Arg82Leu	1.11394	0.190907	11	-0.0525217	1.99543
p.Leu83Gln	0.479741	0.105726	6	-6.24681	5.18268
p.Leu83Arg	0.923137	0.194632	5	-4.87243	3.98763
p.Gln84His	0.623436	0.120385	5	8.78547	5.47361
p.Gln84Lys	1.05396	0.214325	10	4.51148	2.22445
p.Gln84Leu	0.608483	0.0724747	6	-2.05518	2.88165
p.Gln84Pro	1.1457	0.29564	5	0.0837266	3.83415
p.Trp86Arg	1.16614	0.30061	5	5.25732	2.45513
p.Val87Asp	0.880778	0.114331	5	7.42662	1.51672
p.Tyr88Cys	1.0473	0.254035	6	2.62718	0.993857
p.Tyr88Asp	0.94963	0.145119	5	-4.03287	3.46583
p.Tyr88Ser	1.1134	0.218023	6	-2.62585	2.47967
p.Val90Leu	1.34893	0.344566	4	0.352342	3.15978
p.Leu91Pro	0.606173	0.115978	6	0.275635	1.2586
p.Leu91Gln	1.29256	0.21986	5	5.57575	2.9254
p.Leu91Arg	1.23453	0.158489	3	-0.908991	4.13842
p.Glu92Ala	1.14474	0.344628	5	-3.2953	3.62343
p.Glu92Gly	0.998198	0.244156	5	4.32127	2.06415
p.Glu92Lys	0.889932	0.124245	6	-2.97125	2.29649
p.Glu92Val	1.38167	0.280338	5	1.05018	6.87706
p.Arg93Pro	1.00122	0.276995	5	0.66913	3.47768
p.Pro94Ala	0.674735	0.0831894	6	-0.121306	3.4594
p.Pro94His	0.554643	0.117832	5	4.04482	2.83878
p.Pro94Leu	0.875371	0.247384	6	-0.117524	2.62789
p.Pro94Arg	0.878843	0.242728	5	6.59213	3.43149
p.Pro94Ser	1.26856	0.221547	5	-4.59158	2.62587
p.Pro94Thr	0.861075	0.16679	6	11.206	4.01837
p.Arg95Leu	0.915262	0.258689	6	-0.356202	1.84826
p.Arg95Pro	1.12023	0.17872	4	-4.74625	3.89257
p.Gly96Cys	0.733433	0.0932571	5	0.931942	1.74033
p.Gly96Val	1.14789	0.42175	5	-2.96309	2.88511
p.Val100Asp	0.71993	0.227295	7	0.560937	2.94405
p.Val100Phe	0.738212	0.301315	8	6.60871	2.91738
p.Tyr101Cys	0.557603	0.122652	9	7.96113	2.85347
p.Tyr101Asp	0.260959	0.075095	8	19.1142	4.7989
p.Tyr101Asn	0.608695	0.149332	6	4.67868	3.14818
p.Tyr101Ser	0.352891	0.11148	7	8.52321	2.51343
p.His102Asp	0.520842	0.0615672	8	0.540911	3.98031
p.His102Leu	0.446379	0.133605	10	7.01289	1.98083
p.His102Arg	0.694363	0.131598	6	-2.00465	2.09603
p.Val103Asp	0.792041	0.216891	10	0.674662	3.30099
p.Val103Leu	0.730774	0.126056	8	8.34272	3.39077
p.Phe104Ser	0.554112	0.188348	7	-2.82497	4.02986
p.Ile105Lys	0.521801	0.0955983	7	2.80637	5.0809
p.Ile105Arg	0.475874	0.158051	6	9.31892	6.40795
p.Leu107Ser	0.79396	0.224696	6	4.76276	1.79437
p.Leu107Trp	0.831322	0.247947	7	3.78846	3.22379
p.Leu108Arg	0.41498	0.114082	7	2.52191	1.79601
p.Val109Ala	0.631473	0.0740605	5	1.69192	3.18237
p.Val109Asp	0.431818	0.10471	10	7.9366	1.19905
p.Val109Gly	0.658484	0.143947	6	4.8454	2.43359
p.Phe110Leu	0.416618	0.10881	7	7.80861	4.35607
p.Ser111Arg	0.635327	0.131853	4	-2.774	1.76439
p.Cys112Trp	0.178781	0.0397489	6	-2.71336	3.46862
p.Val114Met	0.664092	0.0700809	8	1.43749	3.16526
p.Val117Glu	0.745181	0.298253	6	-0.187821	7.26209
p.Leu118Pro	0.787506	0.234373	4	-2.8032	7.47715
p.Ser119Cys	0.781536	0.223914	6	-2.30409	3.28309
p.Gln122Leu	0.692805	0.188676	6	3.13461	2.29396
p.Glu123Lys	1.04414	0.32811	8	2.68206	1.6378
p.Asn129Ser	0.749216	0.203685	10	2.4632	3.31373
p.Leu132Pro	0.927494	0.15842	3	23.2714	2.94445
p.Glu136Lys	0.838934	0.199479	4	11.4404	10.2208
p.Val138Glu	0.654821	0.156439	7	-1.9699	1.25027
p.Met139Lys	0.788354	0.108108	7	2.72166	4.63319
p.Ile140Asn	0.717357	0.145929	4	-5.54307	3.76115
p.Val141Glu	0.918135	0.11937	6	-0.221681	2.53544
p.Val142Asp	0.885803	0.22501	6	-0.145483	5.48924
p.Gly144Arg	0.761381	0.23021	6	6.3027	3.66051
p.Glu146Ala	0.542933	0.151959	8	4.00733	2.76606
p.Glu146Gly	0.412138	0.0826053	7	3.71836	3.59331
p.Glu146Lys	0.611189	0.135184	6	-1.09564	2.11375
p.Glu146Gln	0.567311	0.136058	8	9.9727	2.59605
p.Glu146Val	0.591078	0.149068	6	1.03918	1.98397
p.Tyr147His	0.869996	0.397459	5	1.70054	4.11438
p.Tyr147Ser	0.780871	0.195855	4	0.260175	6.44463
p.Ile148Leu	0.465017	0.127628	8	5.5267	2.48999
p.Ile148Asn	1.313	0.300721	6	2.607	3.6072
p.Val149Asp	0.8759	0.208681	11	-2.29786	2.78499
p.Arg150Gly	0.514595	0.156061	7	0.70136	1.63753
p.Arg150Pro	0.813772	0.222773	7	2.95408	3.94787
p.Arg150Gln	0.631117	0.144234	7	2.24029	4.63285
p.Arg150Trp	1.13286	0.430281	3	-1.43596	6.60122
p.Val151Ala	0.843331	0.235832	5	-0.135674	2.8662
p.Val151Asp	0.514151	0.0831316	4	-2.42207	4.93649
p.Val151Gly	1.01112	0.161291	7	-4.69896	3.65416
p.Trp152Cys	0.331692	0.0663811	9	5.68305	3.31035
p.Trp152Gly	0.722224	0.173827	7	2.7755	3.97541
p.Trp152Leu	0.418347	0.126974	6	-0.47265	3.03623
p.Trp152Arg	0.26084	0.0756541	6	0.874739	7.43824
p.Trp152Ser	0.413627	0.0954023	7	0.611572	7.45946
p.Ser153Phe	0.640891	0.175186	5	-4.49311	6.60745
p.Ser153Pro	0.755173	0.113606	7	5.68091	3.00089
p.Ser153Thr	0.645176	0.143678	7	3.93844	2.78971
p.Ser153Tyr	0.972793	0.161682	5	-2.47337	1.87544
p.Ala154Asp	0.823486	0.193213	6	10.1275	2.96693
p.Ala154Gly	0.46402	0.131358	8	4.09528	2.92865
p.Ala154Pro	0.953178	0.305069	6	-5.09189	0.372288
p.Ala154Thr	1.10972	0.276734	7	4.34365	1.32353
p.Gly155Glu	0.599222	0.26347	5	4.84544	4.92949
p.Gly155Arg	0.413357	0.166017	6	6.33574	2.61494
p.Gly155Val	0.421046	0.0929652	7	3.61611	3.03407
p.Tyr160Cys	0.507691	0.13056	6	2.19861	4.69831
p.Tyr160Asp	0.847834	0.210654	7	-2.35603	2.31874
p.Tyr160His	0.787261	0.122515	7	1.31049	1.90283
p.Tyr160Asn	0.632597	0.279027	8	2.68488	2.19609
p.Tyr160Ser	0.599124	0.17809	8	7.28399	1.563
p.Arg161Pro	0.966005	0.110958	8	4.10531	4.08504
p.Gly162Arg	0.89302	0.145681	7	-1.39057	4.36341
p.Gly162Val	0.505375	0.118446	8	5.31779	2.91949
p.Trp163Gly	0.728022	0.254082	4	15.1781	1.73273
p.Trp163Ser	0.699097	0.166019	5	7.71772	2.84217
p.Gly165Ala	0.777766	0.387549	7	4.27575	3.26501
p.Gly165Cys	0.680697	0.234885	7	3.4383	2.55316
p.Gly165Asp	0.540373	0.174118	8	3.70792	2.22435
p.Gly165Arg	0.528068	0.169162	9	0.0847032	6.47353
p.Gly165Ser	0.361704	0.0835492	8	6.72482	1.87688
p.Gly165Val	0.375038	0.0738928	8	2.61464	2.7151
p.Arg166Gly	0.697408	0.127567	6	-1.27472	2.94771
p.Arg166Pro	0.794239	0.194366	6	6.47447	4.14296
p.Arg168Pro	0.654544	0.120164	7	2.06526	2.14667
p.Phe169Cys	0.456172	0.120134	5	-7.42313	6.36524
p.Phe169Ile	0.680582	0.233392	6	4.6323	1.83606
p.Phe169Leu	1.28631	0.368433	6	3.66348	1.1268
p.Phe169Ser	0.243862	0.0581848	8	2.33144	5.63501
p.Phe169Val	0.762232	0.140431	6	1.23332	3.5192
p.Ala170Asp	0.591015	0.145718	7	9.17836	3.02428
p.Ala170Pro	0.79376	0.258249	6	3.20222	4.32332
p.Pro173His	0.533875	0.0934823	7	3.22784	1.9815
p.Pro173Arg	0.63921	0.136398	6	4.21526	3.84376
p.Cys175Trp	0.898745	0.208189	6	6.25681	3.18911
p.Val176Asp	0.412268	0.121912	9	6.02567	2.85797
p.Val176Phe	0.601629	0.0971456	8	1.02467	2.87538
p.Asp178Gly	1.25241	0.261404	7	10.3014	2.98053
p.Asp178Asn	0.417367	0.101579	7	5.55698	2.06839
p.Asp178Val	0.610667	0.13709	8	6.80205	1.95456
p.Phe179Ile	0.710988	0.17566	9	1.70397	1.60837
p.Phe179Tyr	0.557919	0.159977	7	7.84542	2.83209
p.Ile180Asn	0.88856	0.166557	7	2.59151	2.18964
p.Val181Glu	0.640877	0.134	7	-2.17848	2.14474
p.Val183Glu	0.703355	0.205139	7	2.71866	3.5175
p.Ser185Pro	0.899628	0.183724	8	13.1934	3.51317
p.Ser185Trp	0.803337	0.275539	7	9.15277	1.78507
p.Val186Glu	0.646868	0.173721	8	4.64834	3.24548
p.Val186Gly	0.624093	0.175097	6	2.30024	2.9984
p.Ala187Asp	1.19583	0.160289	7	-3.1426	1.52164
p.Ile189Leu	0.678946	0.200802	8	0.37229	2.53941
p.Ile189Val	0.414252	0.0780255	8	0.929132	2.88998
p.Ala190Asp	0.285048	0.062502	8	17.3729	4.54526
p.Ala190Pro	0.473799	0.0614235	8	2.85083	3.01065
p.Ala191Thr	0.842747	0.27491	8	10.9687	3.75818
p.Gly192Ala	0.837057	0.246423	8	5.55653	1.09789
p.Gly192Cys	1.02228	0.149043	7	3.96669	2.96074
p.Gly192Val	0.957088	0.131012	9	1.84276	2.63755
p.Thr193Ile	1.09829	0.202092	8	4.29521	2.60178
p.Asn196Ile	0.628381	0.102183	5	19.0225	5.85514
p.Ile197Asn	0.76098	0.200401	9	2.2944	2.86101
p.Phe198Cys	0.917577	0.261202	8	5.20199	3.26102
p.Phe198Ser	0.320639	0.0582349	8	4.40654	4.8352
p.Ala199Asp	0.941443	0.232911	7	-2.6765	1.57367
p.Ala199Pro	0.369788	0.117716	6	5.2409	4.78853
p.Thr200Met	1.0527	0.230934	5	3.32002	3.81792
p.Ser201Cys	0.916775	0.183504	8	6.92895	2.59094
p.Ala202Glu	0.838004	0.0828534	3	-12.9699	5.09756
p.Leu203Arg	0.48595	0.1668	7	0.213267	0.730337
p.Arg204His	0.710866	0.215555	5	3.8869	3.96435
p.Arg204Leu	0.851642	0.150619	8	1.42102	3.31109
p.Ser205Arg	0.444375	0.0552211	13	-1.52333	3.37348
p.Met206Lys	0.679096	0.125208	5	-1.69947	2.97095
p.Met206Arg	0.566084	0.13066	7	-1.6605	1.68298
p.Arg207Cys	0.537854	0.08859	8	-0.562192	1.98628
p.Arg207Gly	0.348491	0.0788999	9	-1.50036	3.04899
p.Arg207His	0.706852	0.140443	4	-8.00478	3.08546
p.Arg207Leu	0.735739	0.236667	4	-3.73069	1.53379
p.Arg207Pro	0.937153	0.224949	4	-1.30504	4.8331
p.Arg207Ser	1.25201	0.264446	7	0.064739	2.68935
p.Leu209Arg	0.332834	0.0490753	4	8.73617	3.46548
p.Gln210Arg	0.287553	0.0559497	7	12.9358	3.13052
p.Ile211Phe	0.900916	0.19928	8	4.86271	2.85585
p.Ile211Asn	0.72945	0.129994	7	19.813	3.21012
p.Leu212Pro	0.823547	0.340516	8	9.47075	5.99333
p.Leu212Arg	0.361088	0.0854453	7	18.88	3.13687
p.Arg213Leu	0.936852	0.307135	5	21.6289	1.8397
p.Arg213Pro	0.499603	0.140963	7	24.6668	3.44242
p.Met214Lys	0.22311	0.052058	7	7.19908	3.17752
p.Met214Arg	0.363995	0.092139	7	6.08554	4.29076
p.Val215Glu	0.339656	0.101224	7	7.50729	3.56029
p.Arg216Pro	0.827879	0.146449	7	-0.888645	4.00984
p.Met217Lys	0.177522	0.032381	6	2.38855	3.94621
p.Met217Arg	0.643529	0.234497	8	19.0328	3.469
p.Asp218Ala	0.804611	0.203546	5	6.46108	2.20566
p.Asp218His	0.668449	0.140538	6	15.4597	2.76372
p.Asp218Asn	0.906088	0.122245	4	11.5294	2.9432
p.Asp218Val	0.775798	0.14025	4	0.135535	5.50885
p.Arg220Leu	0.925201	0.209736	8	1.75411	3.69857
p.Arg220Pro	0.563711	0.092991	8	11.125	3.19963
p.Gly221Asp	0.556407	0.0932003	6	5.51012	4.77639
p.Gly221Arg	0.728455	0.136413	6	4.48112	3.43409
p.Gly221Val	0.67562	0.1505	7	3.3481	2.0369
p.Gly222Ala	0.692201	0.166575	4	5.08939	4.37841
p.Gly222Cys	0.300287	0.034242	8	5.52735	4.40476
p.Gly222Asp	0.978383	0.267918	7	2.68808	2.16637
p.Gly222Val	0.403824	0.0463908	8	-2.659	2.03613
p.Thr223Asn	0.692708	0.276378	6	4.26561	4.14241
p.Trp224Cys	0.218988	0.0217299	8	18.1253	4.35529
p.Trp224Gly	0.68412	0.234078	8	22.1355	2.55982
p.Trp224Arg	0.29784	0.0876355	8	23.588	5.54463
p.Trp224Ser	0.317987	0.0665229	8	2.3107	3.34451
p.Leu226Met	0.33645	0.0869227	7	15.9474	6.76424
p.Leu226Pro	0.271238	0.0898328	7	-1.24458	1.23174
p.Leu226Gln	0.166466	0.0454746	6	-5.63172	7.50681
p.Leu226Arg	0.304616	0.0796107	10	4.84256	3.75981
p.Leu226Val	0.349586	0.121047	8	11.7101	2.49455
p.Leu227Met	0.646679	0.124501	5	-0.945512	2.2605
p.Leu227Pro	0.467147	0.0752961	6	20.1151	4.91408
p.Leu227Gln	0.23131	0.0616305	6	28.3686	6.58823
p.Leu227Arg	0.263498	0.0965166	8	-3.15929	1.14321
p.Gly228Asp	0.576622	0.111159	11	14.2624	3.3863
p.Ser229Pro	0.468484	0.145181	6	2.88162	5.02552
p.Ser229Thr	0.490029	0.13911	8	1.80304	1.75693
p.Val230Ala	1.07738	0.30375	5	-2.53406	3.92704
p.Val230Glu	0.200355	0.0554256	14	6.86068	3.40331
p.Val230Gly	0.321931	0.0855444	6	3.53998	2.68802
p.Val230Leu	0.699713	0.130667	7	2.02703	1.96336
p.Val230Met	0.140464	0.0459249	6	10.4114	3.03902
p.Val231Ala	0.339969	0.0621293	8	7.89031	1.71209
p.Val231Asp	0.463576	0.0864283	7	-2.91702	6.02344
p.Val231Gly	0.505766	0.154516	7	9.52978	3.51007
p.Tyr232Asp	0.97722	0.154851	5	5.32735	2.97476
p.Ala233Glu	1.23033	0.316505	6	1.35415	2.04654
p.Ala233Pro	0.474559	0.189909	8	-1.25199	4.63884
p.His234Asp	1.09946	0.0478439	3	9.14604	2.50131
p.His234Leu	0.707774	0.211171	8	11.0421	2.22881
p.His234Pro	0.682584	0.162713	9	8.26259	4.92317
p.His234Gln	1.21001	0.351902	6	-0.586499	2.31525
p.His234Arg	0.627209	0.0886165	10	1.05326	2.54374
p.His234Tyr	0.84069	0.190483	4	-0.702059	2.4777
p.Ser235Gly	0.767448	0.242182	7	5.1081	1.65478
p.Ser235Ile	0.545767	0.142256	6	4.91404	1.6087
p.Ser235Thr	0.847276	0.212289	8	9.58761	2.45321
p.Lys236Met	0.548101	0.128266	8	14.3828	6.37604
p.Lys236Asn	0.45267	0.0976464	7	2.48303	6.21397
p.Glu237Ala	0.68602	0.210549	7	0.923275	4.08386
p.Glu237Asp	0.645645	0.0663789	6	2.64407	4.31142
p.Glu237Gly	0.663323	0.178442	12	9.00344	3.94886
p.Glu237Lys	0.400861	0.0885177	7	-3.01923	3.47967
p.Glu237Gln	0.717834	0.230964	8	1.72434	4.9401
p.Glu237Val	0.393619	0.0822386	7	-0.489628	0.976597
p.Leu238Pro	0.525244	0.136276	7	-5.50636	4.9388
p.Leu238Gln	0.26659	0.0848488	4	9.8101	1.43983
p.Leu238Arg	0.151263	0.0644936	6	-5.42654	2.27858
p.Leu238Val	0.642008	0.137578	8	7.8745	1.59573
p.Ile239Asn	0.628502	0.15599	7	3.53163	2.10924
p.Thr240Ile	0.657993	0.10817	6	27.1983	3.21249
p.Thr240Asn	1.32357	0.133357	6	6.25264	4.09164
p.Ala241Gly	0.524476	0.144497	8	6.41966	3.44876
p.Ala241Pro	0.61202	0.156507	10	10.8398	2.69383
p.Ala241Val	0.476754	0.0414172	6	4.59268	3.20745
p.Trp242Arg	0.557673	0.0918913	8	-2.96578	1.41767
p.Tyr243Cys	0.441056	0.141244	8	16.1862	4.82753
p.Tyr243Asp	0.870465	0.236848	8	11.7927	2.92859
p.Tyr243Phe	0.792147	0.210137	11	10.9142	1.60713
p.Tyr243Asn	1.09707	0.214051	6	5.86609	3.80972
p.Tyr243Ser	0.619022	0.120673	6	8.31836	1.83564
p.Ile244Asn	0.43614	0.0979887	8	0.652879	2.47573
p.Ile244Ser	0.670197	0.156047	8	6.5599	2.58827
p.Ile244Thr	0.675965	0.21164	10	7.13148	2.20663
p.Ile244Val	0.633348	0.111017	8	4.44673	2.50173
p.Gly245Arg	0.664634	0.118339	8	-3.55495	3.68384
p.Phe246Cys	0.826504	0.212142	5	4.94146	1.22371
p.Phe246Ile	0.914543	0.268325	7	3.32716	2.33816
p.Phe246Leu	1.0169	0.151496	11	1.75098	2.24813
p.Phe246Ser	0.84927	0.0910368	6	-0.734011	2.35778
p.Phe246Tyr	0.453933	0.0841226	8	2.80449	4.34087
p.Leu247Pro	0.526733	0.101169	8	7.06738	1.92225
p.Leu247Gln	0.555976	0.0991175	8	-5.04237	2.82575
p.Leu247Arg	0.608701	0.185671	8	5.0575	3.98039
p.Val248Glu	0.507496	0.143977	8	2.18723	3.59481
p.Val248Gly	0.6853	0.123519	6	4.74522	3.36633
p.Val248Leu	0.773067	0.108494	7	-1.91725	2.34764
p.Leu249Phe	1.11661	0.248722	9	4.84681	1.55041
p.Leu249His	0.244131	0.0694577	8	-1.33364	2.18649
p.Leu249Pro	0.85788	0.175623	7	4.4211	1.61646
p.Leu249Arg	0.606693	0.0909944	7	-0.26403	2.71384
p.Ile250Asn	0.632853	0.100701	7	4.65108	2.46063
p.Ile250Ser	0.618867	0.131337	8	-2.48374	2.21679
p.Ile250Thr	0.875219	0.274849	5	-1.18586	2.42843
p.Phe251Val	0.43293	0.0782794	8	0.726853	2.92764
p.Ala252Asp	1.21775	0.328496	4	1.81737	2.81819
p.Ala252Pro	0.296537	0.0380715	8	0.23091	3.68513
p.Ala252Val	0.705726	0.137717	7	1.6949	3.59704
p.Ser253Ala	0.943967	0.234453	8	3.68509	3.64618
p.Ser253Phe	0.55825	0.216448	7	10.6456	5.86555
p.Ser253Pro	0.658752	0.162215	8	8.36456	1.26452
p.Ser253Tyr	0.361996	0.0684123	7	7.33503	4.88629
p.Phe254Cys	0.912965	0.116863	13	3.55803	1.59034
p.Phe254Ile	0.467898	0.0974924	10	2.05211	3.41316
p.Phe254Leu	1.03226	0.178089	12	-8.22702	2.38781
p.Phe254Val	1.14239	0.175028	6	8.93848	3.00152
p.Leu255Pro	0.325896	0.104967	8	1.80319	5.34459
p.Leu255Gln	0.499069	0.0991335	6	2.232	1.64416
p.Leu255Arg	0.267506	0.0668416	7	10.5169	3.2548
p.Val256Ala	0.579934	0.113322	8	0.703263	2.70978
p.Val256Asp	0.472535	0.0732224	8	1.66657	2.51469
p.Val256Phe	0.3934	0.0753723	8	0.30248	1.79021
p.Val256Gly	0.490616	0.111827	7	3.2571	3.21781
p.Val256Ile	0.602199	0.102579	8	-0.296788	3.00394
p.Tyr257Cys	0.330586	0.05212	13	5.49561	1.8839
p.Tyr257Asp	0.659066	0.187677	6	2.32492	2.50196
p.Tyr257Asn	0.355814	0.0435108	9	-0.0367993	2.38096
p.Tyr257Ser	0.53212	0.113645	8	5.4995	2.99851
p.Leu258Pro	0.364808	0.054215	8	2.7166	3.30273
p.Leu258Arg	0.783969	0.175093	8	9.02058	1.86881
p.Ala259Asp	0.406034	0.0573162	8	4.27207	1.35288
p.Ala259Gly	0.336753	0.0769639	9	2.56235	2.97857
p.Ala259Pro	0.52501	0.0944516	7	-3.47656	1.16846
p.Ala259Thr	0.641202	0.13156	7	4.71643	1.83952
p.Glu260Ala	0.392546	0.0685486	5	1.28524	1.07762
p.Glu260Asp	0.538171	0.0864721	8	2.92458	1.97026
p.Glu260Gly	0.610139	0.173884	8	-0.385616	2.19336
p.Glu260Lys	0.490945	0.0992423	12	4.87023	2.99547
p.Glu260Gln	0.200605	0.0339916	6	9.69415	2.45034
p.Glu260Val	0.448937	0.117991	7	-3.98149	2.29545
p.Lys261Glu	0.581232	0.0922824	7	-6.2815	1.98458
p.Lys261Met	0.584694	0.0896783	7	-1.04714	1.71778
p.Lys261Gln	0.625744	0.123434	7	-2.1358	1.52493
p.Lys261Arg	0.660463	0.203054	8	2.2871	4.36895
p.Asp262Ala	0.507873	0.126903	10	3.96914	2.63126
p.Asp262Val	0.73358	0.0823772	19	-1.61295	1.08752
p.Asp262Tyr	0.569359	0.190454	8	-1.09583	3.61934
p.Ala263Pro	0.886988	0.158542	6	-1.17773	2.9446
p.Asn264Asp	0.780424	0.170442	6	0.325789	3.05987
p.Asn264His	0.909458	0.246491	7	2.4982	1.74943
p.Asn264Ile	0.558401	0.224542	7	-1.75464	3.1938
p.Asn264Lys	0.666637	0.135011	7	1.94593	3.4255
p.Asn264Ser	0.865705	0.131436	10	-4.75777	1.98069
p.Asn264Thr	0.685816	0.0785567	7	-2.11989	1.84448
p.Asn264Tyr	0.431459	0.0535845	9	-2.3113	4.79279
p.Ser265Cys	1.03924	0.229125	6	7.79079	2.71969
p.Ser265Phe	0.687513	0.130151	7	1.59902	3.22705
p.Asp266Ala	0.678238	0.0688483	6	3.07346	3.92207
p.Asp266Glu	0.946552	0.235602	6	6.40409	2.46115
p.Asp266His	1.02201	0.174334	6	3.13586	1.73689
p.Asp266Val	0.436717	0.107947	7	-9.97026	0.905414
p.Asp266Tyr	0.417741	0.0690302	7	3.73987	3.41343
p.Phe267Cys	0.209708	0.0404716	7	-0.340406	3.83739
p.Phe267Ile	1.16546	0.320131	7	-2.12317	2.34952
p.Phe267Leu	0.660252	0.108748	7	1.89633	3.47974
p.Phe267Ser	0.50703	0.155317	7	1.53484	1.96149
p.Phe267Val	0.833619	0.280761	7	1.92569	3.11417
p.Phe267Tyr	0.987259	0.126249	5	2.36919	4.73082
p.Ser268Cys	0.955788	0.223624	8	3.72537	2.98159
p.Ser268Phe	1.12922	0.261323	8	3.71325	2.83604
p.Ser269Ala	0.681697	0.134619	8	4.89082	2.96523
p.Ser269Phe	0.439062	0.0766871	13	-0.284385	3.05508
p.Ser269Pro	0.545226	0.14202	8	3.62189	1.04461
p.Ser269Tyr	0.700442	0.152107	8	0.342773	3.24092
p.Tyr270Cys	0.426336	0.0489998	9	-1.10015	7.42539
p.Tyr270Asp	0.460224	0.05508	9	-2.31391	4.31269
p.Tyr270His	0.510107	0.07238	12	4.72671	2.56953
p.Tyr270Asn	0.599616	0.242454	7	-2.0341	3.87192
p.Tyr270Ser	0.426602	0.08106	8	4.4806	3.00441
p.Ala271Asp	0.520698	0.0847912	7	7.73883	5.5949
p.Ala271Pro	0.842092	0.156803	5	13.2543	2.29486
p.Ala271Val	0.616584	0.0755378	9	2.72921	3.31793
p.Asp272Ala	0.758337	0.170357	8	2.55999	3.50371
p.Asp272Gly	0.648014	0.203921	8	-4.32855	2.36136
p.Asp272His	0.63876	0.144244	7	0.313228	2.30678
p.Asp272Asn	0.726504	0.150785	7	-1.35909	2.05176
p.Asp272Val	0.447578	0.120014	8	-2.10424	5.09544
p.Asp272Tyr	0.745771	0.138855	9	-3.36086	5.70395
p.Ser273Leu	0.344836	0.0770744	8	-0.6171	5.00715
p.Ser273Pro	0.295269	0.0453715	8	4.15801	2.61373
p.Ser273Thr	0.695292	0.112616	7	5.88606	2.15121
p.Ser273Trp	0.314892	0.0672577	8	-0.520455	1.78305
p.Leu274Phe	1.28948	0.534982	7	3.66154	2.4101
p.Leu274His	0.591589	0.117704	10	-1.29532	2.8357
p.Leu274Pro	0.408036	0.074295	8	3.97832	2.249
p.Leu274Arg	0.252797	0.0654485	8	5.79971	3.97221
p.Leu274Val	0.706822	0.106331	7	0.978997	3.16533
p.Trp275Cys	0.505385	0.0948165	7	5.14133	6.87587
p.Trp275Gly	0.29809	0.0776697	7	-4.10743	5.19667
p.Trp275Leu	0.195778	0.0532517	8	1.76096	4.48914
p.Trp275Arg	0.541127	0.117824	10	2.24288	2.22939
p.Trp275Ser	0.348754	0.0735459	11	-1.06282	2.95123
p.Trp276Cys	0.504914	0.172721	6	5.42809	2.14132
p.Trp276Gly	0.425595	0.0668954	8	3.25912	3.96808
p.Trp276Leu	0.340078	0.0925196	7	4.71125	2.2216
p.Trp276Arg	0.139121	0.0193027	7	-4.35964	6.22852
p.Trp276Ser	0.495167	0.121442	8	0.589244	1.46862
p.Gly277Glu	0.456911	0.0672675	10	-2.7309	2.89036
p.Gly277Arg	0.455878	0.116128	8	5.96266	3.4981
p.Gly277Val	0.420321	0.106546	11	4.54603	2.39054
p.Gly277Trp	0.48922	0.135054	8	-1.61963	2.41724
p.Thr278Lys	0.480581	0.17451	7	0.386024	2.80148
p.Thr278Pro	0.16248	0.0643628	8	11.8044	3.81349
p.Thr278Arg	0.564421	0.134691	8	-2.08063	2.98274
p.Thr278Ser	0.334274	0.081141	11	-0.355093	3.06167
p.Ile279Phe	0.343836	0.0450046	8	-2.41891	2.17292
p.Ile279Leu	0.441348	0.0868508	11	3.69576	2.11965
p.Ile279Met	0.662793	0.195612	8	-2.84274	5.76654
p.Ile279Asn	0.407833	0.100403	8	-1.81325	3.74231
p.Ile279Ser	0.32492	0.107802	8	1.00312	1.94023
p.Ile279Thr	0.837037	0.207012	8	-2.72038	3.35817
p.Ile279Val	0.814377	0.239124	6	2.49178	1.81111
p.Thr280Ala	0.833981	0.16753	7	5.19995	2.53026
p.Thr280Ile	0.791476	0.0690676	6	-0.958267	1.70403
p.Thr280Lys	0.649542	0.118098	8	-2.47316	2.19724
p.Thr280Pro	0.326189	0.0922599	10	2.38369	4.51349
p.Thr280Arg	0.654643	0.26724	10	4.40866	5.09164
p.Leu281Ser	0.553923	0.0819563	15	4.7	1.78463
p.Leu281Val	0.404232	0.108017	8	4.79023	3.34807
p.Leu281Trp	0.567641	0.11953	11	3.08221	2.21609
p.Thr282Ala	0.591313	0.12833	8	0.337366	2.90976
p.Thr282Ile	0.700281	0.0893945	7	4.62822	3.52499
p.Thr282Lys	0.903329	0.20639	6	0.614558	1.85205
p.Thr282Pro	0.677483	0.124923	7	2.77189	4.3699
p.Thr282Arg	0.360568	0.0559572	8	4.35516	3.15642
p.Thr282Ser	1.14741	0.246893	7	7.51918	2.46532
p.Thr283Ala	0.420131	0.110931	6	3.46933	0.934867
p.Thr283Ile	0.430405	0.101144	8	-3.91795	3.20656
p.Thr283Asn	0.52369	0.093056	8	4.23318	3.29141
p.Thr283Pro	0.361746	0.0698203	7	1.16942	2.5642
p.Thr283Ser	0.777516	0.29375	7	-1.78811	2.11214
p.Ile284Phe	0.574768	0.178448	8	0.996614	1.92836
p.Ile284Leu	0.398767	0.0804143	10	-0.117467	4.29147
p.Ile284Met	0.542137	0.142944	8	0.113863	3.67615
p.Ile284Asn	0.432417	0.100084	8	-1.79623	3.73523
p.Ile284Ser	0.395008	0.0716874	8	-3.8278	4.59076
p.Ile284Thr	0.569678	0.0965044	7	5.75909	2.16269
p.Gly285Ala	0.591171	0.148058	7	-0.98883	3.00778
p.Gly285Cys	0.72256	0.0660603	15	0.312669	1.60117
p.Gly285Asp	0.370163	0.0688786	7	1.96539	5.41983
p.Gly285Arg	0.409148	0.14936	7	6.33413	2.74375
p.Gly285Ser	0.523413	0.119305	14	-1.00282	2.2219
p.Gly285Val	0.623432	0.146235	8	-1.16729	2.49465
p.Tyr286Cys	0.460991	0.0641666	8	2.57289	2.77218
p.Tyr286Asp	0.619868	0.173831	7	-3.41581	1.1028
p.Tyr286Phe	0.688123	0.158108	8	-0.294032	3.17034
p.Tyr286His	0.132071	0.0653116	5	9.8713	3.36955
p.Tyr286Asn	0.36681	0.0875688	10	-2.02534	3.01225
p.Tyr286Ser	0.372447	0.0977324	8	4.30146	2.47137
p.Gly287Ala	0.477119	0.0914143	8	2.2735	2.92062
p.Gly287Cys	0.442087	0.198498	8	6.25782	2.845
p.Gly287Asp	0.877032	0.166055	7	1.46774	3.09271
p.Gly287Arg	0.467823	0.113581	8	2.86682	2.90917
p.Gly287Ser	0.317651	0.0958627	8	3.41308	2.87341
p.Gly287Val	0.472381	0.0683219	9	5.83888	2.38324
p.Asp288Ala	0.28496	0.0805567	9	-2.13005	1.98359
p.Asp288Glu	0.544853	0.172258	7	-4.47654	5.01046
p.Asp288Gly	0.487206	0.1405	8	4.24152	4.3788
p.Asp288His	0.537183	0.217714	8	5.50275	3.53153
p.Asp288Asn	0.475165	0.114343	8	-1.29706	2.39661
p.Asp288Val	0.368917	0.0755169	7	-1.9628	2.68184
p.Asp288Tyr	0.512113	0.0855087	8	-1.4194	1.3656
p.Lys289Glu	0.523177	0.152345	12	-1.75659	2.81475
p.Lys289Asn	0.634157	0.147624	8	3.29255	2.48121
p.Lys289Gln	0.513892	0.0879958	8	3.36929	1.9386
p.Lys289Arg	1.1661	0.183065	8	4.97937	1.16218
p.Thr290Ala	0.863232	0.255757	8	1.69911	5.52109
p.Thr290Lys	0.840387	0.216586	6	6.35836	2.88121
p.Thr290Pro	0.385569	0.115488	7	-1.16249	2.72501
p.Thr290Arg	0.916515	0.292976	7	3.00525	3.44461
p.Pro291Ala	0.722127	0.141101	7	-0.942974	2.42294
p.Pro291Leu	0.448679	0.0929814	8	3.5211	2.97919
p.Pro291Gln	0.435871	0.0836275	19	1.16769	2.10802
p.Pro291Arg	0.309584	0.0710441	6	6.68308	4.086
p.Pro291Ser	0.464069	0.0747906	11	3.99677	0.856761
p.Pro291Thr	0.663376	0.194651	9	5.73219	2.19889
p.His292Pro	0.535495	0.181245	8	0.493192	1.43323
p.Thr293Ala	0.516469	0.104433	7	-0.411969	3.02463
p.Thr293Ile	0.372121	0.115043	8	-5.27698	7.4847
p.Thr293Lys	0.330593	0.0458665	8	-3.484	3.36612
p.Thr293Pro	0.232271	0.0424733	7	5.60868	0.963682
p.Thr293Arg	0.433686	0.149431	10	4.19532	5.53976
p.Thr293Ser	1.02256	0.203048	8	3.77165	2.94851
p.Leu295Pro	0.800811	0.144505	7	1.75268	1.77046
p.Leu295Gln	0.608098	0.13404	8	-2.38256	3.50152
p.Leu295Arg	0.901388	0.136926	4	3.0803	1.92398
p.Gly296Ala	0.539337	0.119132	8	-5.67847	2.04398
p.Gly296Cys	0.288303	0.06893	7	-3.30593	1.1901
p.Gly296Asp	0.275092	0.0931552	8	-1.58805	3.71377
p.Gly296Arg	0.355414	0.108239	6	0.37548	5.84048
p.Gly296Ser	0.62375	0.0889758	18	-3.39803	2.09328
p.Gly296Val	0.166449	0.0360439	11	0.20754	2.61431
p.Arg297Gly	0.498124	0.0955828	9	9.93624	1.61323
p.Arg297Ser	0.542282	0.174616	11	0.685085	2.0179
p.Arg297Thr	0.821214	0.282652	7	3.0407	5.19682
p.Arg297Trp	0.303815	0.0388659	7	6.17067	2.74765
p.Val298Asp	0.259691	0.0618782	7	7.81126	4.48201
p.Val298Gly	0.775131	0.291913	6	-6.01951	1.7681
p.Leu299Pro	0.197869	0.0284864	8	2.29923	4.87496
p.Leu299Gln	0.961246	0.300564	7	-3.79978	3.39431
p.Leu299Arg	0.353309	0.0670253	8	1.64404	2.77243
p.Ala300Asp	0.346385	0.0525077	8	0.503667	3.58085
p.Ala300Pro	0.282591	0.0609689	7	2.87776	2.86659
p.Ala300Val	0.48057	0.156443	10	7.29016	3.211
p.Ala301Asp	0.362777	0.0158775	6	1.37971	2.66238
p.Ala301Pro	0.275835	0.0511756	8	2.15138	5.52498
p.Gly302Asp	0.320685	0.0934858	9	5.35495	2.09425
p.Gly302Arg	0.0976257	0.0262801	7	5.05753	3.65764
p.Phe303Ile	0.910493	0.278196	7	3.95842	1.21527
p.Phe303Leu	0.698179	0.208325	8	2.07602	2.84451
p.Phe303Val	0.580246	0.0930909	7	2.95159	3.73084
p.Phe303Tyr	0.427213	0.103836	8	6.898	0.940997
p.Ala304Asp	0.781328	0.227746	8	3.23139	2.06315
p.Ala304Pro	0.353622	0.104031	8	4.92463	2.78545
p.Ala304Thr	0.691021	0.132507	7	2.58074	3.82963
p.Ala304Val	1.20901	0.419899	8	0.230445	1.37824
p.Leu305Ser	0.286551	0.112384	6	-6.84575	1.79795
p.Leu306Pro	1.32406	0.325996	4	3.3612	4.12433
p.Leu306Gln	0.560319	0.258545	7	-1.43338	2.63718
p.Leu306Arg	0.397131	0.111264	8	0.413369	2.03601
p.Gly307Ala	0.379161	0.107151	7	4.1483	1.9908
p.Gly307Cys	0.555969	0.119489	8	1.45888	1.43576
p.Gly307Asp	0.788906	0.151633	7	0.577086	1.76072
p.Gly307Arg	0.338233	0.0979	7	4.43577	2.19342
p.Gly307Ser	0.592937	0.15378	9	1.43244	2.09406
p.Gly307Val	0.298357	0.0555278	8	0.0220446	2.88211
p.Ile308Leu	0.756836	0.220713	9	4.85495	1.83803
p.Ile308Met	1.08456	0.319291	4	2.63498	1.37681
p.Ser309Cys	1.12725	0.145293	4	-0.739193	0.834555
p.Ser309Phe	0.212923	0.0534455	8	5.09502	2.16743
p.Ser309Thr	0.305599	0.0770623	8	-3.58496	2.94417
p.Ser309Tyr	0.893658	0.196847	7	3.50921	3.40616
p.Phe310Cys	1.37382	0.357775	6	3.51581	2.60332
p.Phe310Tyr	0.518529	0.116022	8	-1.86437	2.34428
p.Phe311Cys	0.631453	0.0264849	4	-8.80505	0.2507
p.Phe311Ile	0.800803	0.148071	7	4.1482	2.36829
p.Phe311Ser	0.519578	0.118714	10	3.65364	2.57195
p.Phe311Val	1.03698	0.171116	6	1.70594	2.04885
p.Ala312Asp	0.419715	0.117323	8	1.79874	2.42004
p.Ala312Thr	0.667665	0.129706	7	-5.07309	1.29231
p.Ala312Val	0.677448	0.156417	6	-0.656008	2.43406
p.Leu313Pro	1.00229	0.22941	8	3.63351	2.09337
p.Leu313Gln	0.584636	0.0861848	7	3.58875	1.85876
p.Leu313Arg	1.3053	0.207833	5	-3.96954	0.507218
p.Pro314Ala	0.167247	0.0470208	7	-1.28499	2.40573
p.Pro314His	0.623003	0.154551	9	-1.56112	2.62982
p.Pro314Leu	0.370395	0.0836211	7	-3.29962	2.31151
p.Pro314Arg	0.876382	0.225486	6	1.03372	2.09277
p.Pro314Ser	0.203768	0.105163	7	2.754	0.343564
p.Pro314Thr	0.445411	0.116347	9	8.40179	0.813452
p.Ala315Asp	0.501534	0.107912	8	2.78854	2.80169
p.Ala315Val	0.81306	0.150076	4	1.29604	0.886173
p.Gly316Ala	0.493246	0.161343	8	0.669542	2.09117
p.Gly316Cys	0.405233	0.115898	11	-1.07207	2.39497
p.Gly316Asp	1.21969	0.173407	6	-3.73659	1.91993
p.Gly316Arg	0.0822197	0.0208921	8	3.94839	3.39612
p.Gly316Ser	0.667236	0.181509	5	4.092	2.2517
p.Gly316Val	0.321034	0.071653	9	-0.649924	2.0875
p.Ile317Leu	0.802754	0.165781	5	-2.62823	1.15079
p.Ile317Met	0.685641	0.118886	7	-0.639573	5.08918
p.Ile317Asn	0.737218	0.066276	6	0.838965	2.84123
p.Ile317Ser	1.37186	0.198136	5	-4.93342	2.61541
p.Leu318Ile	1.11261	0.232703	11	-0.71977	1.459
p.Leu318Pro	1.14303	0.196518	10	-3.70368	1.82048
p.Leu318Gln	0.619083	0.0791885	10	-0.325408	2.39229
p.Leu318Arg	0.892229	0.118887	8	-0.621162	2.48482
p.Leu318Val	1.0625	0.230944	9	-3.37956	2.70402
p.Gly319Ala	0.902752	0.31423	6	-12.5301	1.50269
p.Gly319Cys	1.26563	0.298007	6	-4.06703	3.37224
p.Gly319Asp	1.04842	0.169091	12	-7.17816	2.44086
p.Gly319Arg	0.810076	0.206926	8	-6.34562	2.13846
p.Gly319Val	0.930209	0.226035	8	-7.99746	2.72023
p.Ser320Ala	0.660643	0.191227	5	-1.30779	1.05133
p.Ser320Cys	0.178276	0.0614894	6	0.199282	2.0624
p.Ser320Phe	1.04808	0.217927	3	-13.2403	2.55285
p.Ser320Pro	0.984299	0.202452	9	2.86545	1.47844
p.Ser320Tyr	1.06299	0.18353	13	-7.35497	2.12291
p.Gly321Ala	0.619455	0.264603	7	-2.13514	2.97382
p.Gly321Cys	0.122342	0.034974	6	-0.0923956	4.87815
p.Gly321Asp	0.760991	0.144569	5	-4.59171	6.12714
p.Gly321Arg	1.06387	0.192	7	-10.3911	1.51333
p.Gly321Ser	0.488446	0.165069	14	-4.80213	2.61496
p.Gly321Val	1.01962	0.38869	7	-1.8116	2.82518
p.Phe322Cys	0.975871	0.245676	7	16.2394	3.15881
p.Phe322Ile	1.06127	0.243095	6	23.8693	3.49592
p.Phe322Ser	0.879503	0.152602	8	9.47601	2.29094
p.Phe322Val	0.896564	0.246628	8	27.3566	3.02455
p.Phe322Tyr	0.747642	0.139835	7	4.58163	2.33801
p.Ala323Asp	1.27976	0.326119	7	-8.26859	5.35712
p.Ala323Pro	0.919761	0.19243	8	-4.4264	4.24571
p.Ala323Thr	0.676374	0.114602	6	-6.76321	7.47873
p.Ala323Val	0.842285	0.0568189	6	-12.6144	3.43284
p.Leu324Pro	1.12548	0.250506	11	-6.58076	3.1743
p.Leu324Gln	1.04196	0.182138	5	-22.9683	1.81558
p.Leu324Arg	0.510876	0.183071	6	-15.9981	3.29247
p.Leu324Val	1.56614	0.401019	17	-17.734	2.67489
p.Lys325Asn	0.826748	0.356104	7	6.91207	1.58125
p.Lys325Gln	0.875416	0.206344	6	-7.56504	6.54839
p.Lys325Arg	0.55079	0.253581	8	-7.88487	4.34187
p.Val326Ala	0.976945	0.291821	7	-3.05479	2.84198
p.Gln327His	1.31677	0.285296	12	-1.85942	3.04628
p.Gln327Leu	0.74253	0.140526	7	5.43507	3.32953
p.Gln327Pro	0.876312	0.123603	13	0.422308	1.98336
p.Glu328Ala	1.03789	0.245791	7	4.94505	1.4493
p.Glu328Gly	1.08481	0.35733	7	-0.511061	1.96204
p.Glu328Val	0.886043	0.190041	6	-4.23648	1.7839
p.Gln329His	0.795519	0.240963	8	-3.47549	2.61791
p.Gln329Lys	0.631308	0.144181	7	-0.814404	2.528
p.Gln329Pro	1.14154	0.200919	13	-5.01915	1.54711
p.His330Asn	0.804462	0.174879	7	-0.39504	2.96492
p.His330Pro	0.247515	0.0540908	7	-0.566778	2.09959
p.His330Gln	1.16283	0.28276	9	3.62575	2.24826
p.His330Tyr	1.07355	0.286423	7	3.10659	2.73345
p.Arg331Gly	0.0589689	0.0116943	5	4.45077	4.19815
p.Arg331Leu	0.483964	0.170841	8	0.693487	3.76007
p.Arg331Pro	0.666829	0.14023	7	-1.0904	2.36629
p.Arg331Gln	0.808653	0.21378	7	1.807	3.10005
p.Arg331Trp	0.85898	0.151961	7	8.89776	3.02267
p.Gln332His	1.15161	0.247326	6	5.91442	2.31151
p.Gln332Leu	1.11654	0.191805	13	2.36712	2.3736
p.Gln332Pro	0.310925	0.0756988	7	-1.24347	5.96427
p.Lys333Met	0.62811	0.12083	6	4.14227	2.73918
p.Lys333Asn	0.669307	0.159888	7	2.73203	2.80101
p.Lys333Gln	0.495008	0.0779931	8	14.0968	2.66799
p.Lys333Thr	1.31733	0.342488	7	6.37736	2.00008
p.His334Asp	0.796615	0.159645	12	4.23403	1.56584
p.His334Leu	0.974868	0.244373	7	4.90462	2.36725
p.His334Asn	0.882234	0.175552	6	3.61023	1.75347
p.His334Pro	0.282213	0.0343091	6	-1.49589	1.2639
p.His334Gln	0.795573	0.133039	6	0.153528	1.90557
p.His334Arg	0.717433	0.215533	7	-0.228908	4.36819
p.Phe335Cys	0.512752	0.0864674	7	-3.22527	1.9056
p.Phe335Ser	1.15285	0.332485	6	7.18227	1.10909
p.Phe335Val	0.899651	0.19283	7	6.01769	2.60136
p.Phe335Tyr	1.12006	0.221221	7	5.4063	2.80436
p.Glu336Ala	1.01136	0.299384	7	5.19232	2.54971
p.Glu336Asp	0.568318	0.142404	8	8.83147	2.06925
p.Glu336Gly	0.38339	0.0762541	6	-2.75425	2.63496
p.Glu336Lys	0.66684	0.200236	9	1.39468	1.95546
p.Glu336Gln	0.984821	0.239956	8	-6.01281	3.98324
p.Glu336Val	0.492694	0.0584723	5	2.6281	3.78396
p.Lys337Glu	0.921801	0.329289	7	1.73701	2.54085
p.Lys337Met	0.866435	0.164933	6	2.66871	2.29011
p.Lys337Asn	0.528327	0.123652	7	6.33037	2.13913
p.Lys337Gln	0.877069	0.171083	8	-2.05564	3.47727
p.Lys337Arg	0.838628	0.257308	7	2.33512	2.42434
p.Lys337Thr	0.595268	0.269279	8	1.19987	2.44325
p.Arg338Gly	0.709279	0.217112	7	1.84651	2.59984
p.Arg338Leu	0.857946	0.254472	7	-1.77072	1.38797
p.Arg338Pro	0.638188	0.173772	7	2.02018	1.44004
p.Arg338Gln	1.14115	0.274982	6	-1.88527	4.93059
p.Arg338Trp	0.827954	0.109826	7	7.58574	2.31219
p.Arg339Gly	0.434396	0.106801	8	0.3339	3.04011
p.Arg339Ser	0.809388	0.165159	10	5.65723	1.7802
p.Arg339Trp	0.565035	0.162508	8	-0.220593	5.55905
p.Pro341Ala	1.00701	0.716936	7	-0.963594	4.28829
p.Pro341Gln	1.22268	0.23892	10	-8.2137	3.59784
p.Pro341Arg	1.4212	0.280583	11	-13.3671	4.51333
p.Pro341Ser	1.31118	0.55025	8	-0.032118	2.38666
p.Ala342Glu	0.62079	0.0784444	6	0.461248	4.62266
p.Ala342Gly	0.85586	0.379338	5	1.46665	4.1429
p.Ala342Pro	0.687556	0.125973	6	4.06585	2.21421
p.Ala342Ser	0.777507	0.177331	7	2.09775	1.82897
p.Ala342Thr	0.677627	0.250239	6	-4.02615	3.75082
p.Ala342Val	0.50659	0.112471	7	-1.74312	1.7052
p.Ala343Asp	0.790402	0.253979	7	-7.91153	1.12039
p.Ala343Pro	0.40911	0.0617753	6	-2.74874	3.43776
p.Asn344His	1.09345	0.179574	8	3.15553	1.75057
p.Asn344Ile	1.2643	0.321749	7	0.00782786	2.90416
p.Asn344Tyr	1.26917	0.276959	7	-0.00229	3.03807
p.Leu345His	0.669514	0.13422	7	-3.58171	4.35465
p.Leu345Pro	0.88082	0.388602	8	-1.1186	2.64978
p.Ile346Phe	0.742563	0.169268	7	2.43315	2.20523
p.Ile346Asn	0.704088	0.254487	8	-5.81198	1.16513
p.Ile346Ser	0.887334	0.303066	7	-2.51206	3.0188
p.Ile346Thr	0.62613	0.189952	8	1.24508	2.66789
p.Ile346Val	0.622119	0.210721	10	0.732029	3.15651
p.Gln347Pro	0.709642	0.20858	7	-4.21927	4.14248
p.Ala348Pro	0.477462	0.127651	7	4.36318	3.29492
p.Ala349Asp	0.409474	0.0517344	7	1.95024	0.995755
p.Ala349Pro	1.03053	0.290553	6	2.82359	2.31171
p.Trp350Cys	0.995388	0.269864	7	-2.66976	3.88647
p.Trp350Gly	1.00956	0.225425	7	-0.938321	4.71291
p.Trp350Leu	0.945348	0.186395	7	-3.39082	1.36664
p.Trp350Arg	0.60256	0.1597	9	4.48649	1.6544
p.Trp350Ser	0.992081	0.289653	7	2.40856	2.58416
p.Arg351Cys	0.903788	0.249298	7	3.67169	1.68144
p.Arg351Gly	0.6306	0.154202	7	-0.706543	2.17614
p.Arg351Leu	0.967539	0.162198	7	4.36294	2.19161
p.Arg351Pro	0.673258	0.178248	8	1.23555	3.33472
p.Arg351Ser	0.631665	0.163981	7	3.84449	1.51884
p.Leu352Pro	0.537186	0.149624	7	5.83909	1.72052
p.Tyr353Asp	0.312464	0.0588282	7	1.37163	3.90401
p.Ser354Ala	1.11285	0.239828	7	12.8103	4.30334
p.Ser354Phe	0.813942	0.156795	6	5.91025	2.95343
p.Ser354Pro	0.674716	0.12115	9	1.68711	2.12453
p.Ser354Tyr	0.578445	0.153082	8	2.78653	3.03288
p.Thr355Ile	1.04703	0.392994	5	3.4155	2.73123
p.Thr355Asn	1.00762	0.204316	7	5.21035	2.3606
p.Asp356Ala	1.3085	0.338453	7	2.77615	2.54601
p.Asp356Gly	1.01568	0.279086	7	0.270385	1.34799
p.Asp356Val	0.456766	0.168359	7	2.83465	3.41454
p.Asp356Tyr	0.217688	0.0604537	6	0.276189	3.79415
p.Leu362Pro	1.18274	0.076068	6	0.534002	1.48015
p.Leu362Gln	0.364073	0.061042	7	-0.753103	2.88715
p.Ala364Val	0.935073	0.20192	9	4.19687	2.13458
p.Thr365Ile	0.935294	0.193671	8	-2.61168	1.47048
p.Tyr367His	0.417891	0.113258	7	0.985146	2.22735
p.Tyr368Ser	1.05161	0.199282	7	-7.18376	2.91789
p.Tyr369Phe	0.85896	0.0706692	7	-0.493943	2.81201
p.Ser375Cys	1.24985	0.193297	11	1.84678	2.90384
p.Leu381Arg	0.855109	0.115695	7	0.775032	2.06898
p.His385Arg	0.875605	0.199545	7	-3.63534	4.38525
p.Arg390Leu	1.08919	0.157283	9	-0.626051	1.68415
p.Val399Met	0.906889	0.241707	8	6.86092	2.4574
p.Gly422Arg	0.479951	0.0679777	7	2.66061	2.31477
p.Ser425Tyr	1.03549	0.154429	7	1.21367	1.16141
p.Ile440Phe	1.31178	0.236367	6	-0.406203	2.95149
p.Met442Arg	0.888661	0.223953	7	0.656421	3.00483
p.Gln446Leu	1.24313	0.27034	7	3.86142	2.17239
p.Arg448Leu	0.398151	0.180439	7	0.268061	2.46653
p.Pro451Thr	1.10806	0.285584	7	1.37457	2.62868
p.Met461Lys	1.12988	0.0776055	5	-4.31991	3.17965
p.Thr463Ala	0.619215	0.184868	12	1.66018	2.82528
p.Glu468Asp	0.71869	0.0914811	7	3.15023	3.45574
p.Gln469Arg	0.83467	0.135729	12	4.00065	1.94205
p.Val470Ala	1.19095	0.288218	6	0.691256	1.89914
p.Thr477Pro	1.02132	0.226278	7	1.33978	2.54566
p.Val479Gly	1.24977	0.19413	13	-3.72989	1.84687
p.Gln480Leu	1.3368	0.355822	8	3.3961	2.81095
p.Trp483Ser	1.01987	0.261548	8	-2.96055	2.89415
p.Ser484Thr	0.919945	0.116346	5	-1.68323	2.18758
p.Phe485Cys	0.617497	0.157282	5	1.13116	1.02401
p.Phe491Ile	0.704381	0.299509	8	3.09769	2.66454
p.Arg496Ser	0.992417	0.276429	8	6.96046	4.00146
p.Pro499Ala	0.762572	0.213422	7	0.521927	1.29672
p.Pro499His	0.958199	0.290911	7	-0.628329	2.3777
p.Ser502Phe	1.35573	0.240571	8	-0.2765	2.3823
p.Glu504Asp	1.1196	0.217434	11	-1.22356	2.46688
p.Glu504Val	1.21952	0.237777	6	-2.79539	2.62256
p.Asp505Gly	0.955562	0.232066	6	-6.3896	1.60415
p.Glu509Gln	0.399836	0.0701973	8	-3.50276	2.62649
p.Glu513Val	0.907995	0.201064	7	-0.211481	4.11089
p.Lys515Glu	1.33835	0.0802081	8	-9.91549	4.63825
p.Ser516Cys	0.653231	0.165727	7	-2.24666	3.93293
p.Pro528His	1.14166	0.251517	7	-0.909884	1.7169
p.Val533Asp	1.34445	0.321791	8	-1.36328	2.22413
p.Arg535His	1.15269	0.232178	7	0.352002	1.35599
p.Arg535Pro	0.422622	0.131431	11	7.16415	2.4568
p.Ile537Leu	0.32345	0.0915292	10	8.23161	3.08627
p.Ile537Val	1.10124	0.231193	7	-1.76126	2.91955
p.Leu540Pro	1.06057	0.178858	7	-1.07613	2.45892
p.Leu540Arg	1.21025	0.290687	8	2.7193	2.15583
p.Lys541Thr	1.3693	0.199158	11	4.21109	1.75063
p.Phe542Ser	0.990147	0.261623	8	-1.82452	5.9177
p.Leu543Pro	0.892848	0.118858	8	0.773144	2.86973
p.Leu543Gln	0.287821	0.0411786	7	0.637867	3.99501
p.Ala545Pro	1.14777	0.32015	8	2.0971	1.58671
p.Arg547Met	1.10653	0.208878	13	1.6343	1.23561
p.Arg547Trp	0.958507	0.230465	7	3.97073	2.82099
p.Phe549Cys	1.29371	0.239503	7	8.21525	2.9013
p.Phe549Ser	1.24362	0.361837	4	4.88321	1.54172
p.Phe549Tyr	0.475049	0.0507358	7	4.95407	2.29804
p.Lys550Glu	0.559291	0.0941109	6	-1.35413	0.635688
p.Lys550Met	0.895644	0.157221	7	2.2783	1.47784
p.Lys550Asn	0.485457	0.0527502	7	-1.93103	3.07945
p.Lys550Gln	1.35581	0.250091	7	2.75234	1.79801
p.Glu551Ala	0.981878	0.106462	7	-2.03665	3.56234
p.Glu551Asp	0.500314	0.0702874	8	4.57273	3.48468
p.Glu551Gly	0.331982	0.038324	7	4.4683	4.51643
p.Thr552Ile	0.819127	0.136217	7	3.70954	2.36448
p.Thr552Pro	1.14845	0.378024	5	7.73026	2.58175
p.Thr552Arg	0.953318	0.178759	12	-0.33491	1.44739
p.Thr552Ser	0.918323	0.1583	4	-3.74041	1.22946
p.Leu553Pro	0.782813	0.277475	9	-0.39448	1.99002
p.Leu553Gln	0.718357	0.278145	7	3.17149	3.44724
p.Leu553Arg	0.881899	0.275046	7	2.98284	1.93305
p.Leu553Val	0.757468	0.17054	7	1.07114	1.80369
p.Arg554Pro	1.27958	0.164652	10	1.93892	1.23084
p.Pro555Ala	1.03475	0.320533	7	-0.0916294	1.67569
p.Pro555Leu	0.384252	0.0464992	8	3.43757	2.23826
p.Pro555Gln	0.602454	0.0872806	8	2.51434	4.03423
p.Pro555Arg	0.776129	0.101065	8	5.51324	2.67507
p.Pro555Ser	1.1801	0.195533	13	4.05843	1.42115
p.Pro555Thr	0.589944	0.157159	9	1.24764	3.95428
p.Tyr556Cys	0.910379	0.180735	10	3.62237	1.20784
p.Tyr556Asp	0.927004	0.244057	7	1.60756	2.45913
p.Tyr556Ser	1.35702	0.283899	8	4.46619	1.59106
p.Asp557Ala	0.978927	0.252557	7	1.81037	1.78097
p.Asp557Glu	0.569948	0.210329	7	2.2161	2.74466
p.Asp557Gly	0.940473	0.305308	11	0.939221	1.80505
p.Asp557His	0.719159	0.179558	8	5.64063	1.84807
p.Asp557Asn	0.504876	0.111818	6	-2.47111	2.95699
p.Asp557Val	0.419864	0.145152	9	2.16023	1.93438
p.Asp557Tyr	0.327986	0.0897483	8	1.70973	2.49546
p.Lys559Glu	1.00114	0.202526	6	4.36573	3.64978
p.Lys559Thr	0.924489	0.208319	6	2.14144	1.32664
p.Asp560Ala	0.886936	0.217265	6	-0.991688	1.96889
p.Asp560His	0.989774	0.208688	7	-7.6836	4.02808
p.Asp560Asn	1.29793	0.440461	6	4.39073	1.20269
p.Asp560Val	0.93459	0.271713	7	0.0899122	1.18756
p.Asp560Tyr	0.260812	0.0609443	7	1.30584	2.35885
p.Ile562Met	1.10781	0.175456	7	-1.30027	1.85116
p.Glu563Asp	1.1266	0.191686	5	-1.4491	1.55488
p.Gln564Glu	0.940302	0.270963	6	-1.258	2.25738
p.Gln564His	1.15489	0.126602	4	0.78817	3.36949
p.Gln564Leu	0.681392	0.332895	5	-4.1102	4.44482
p.Ser566Thr	1.36252	0.326322	6	2.19972	2.59286
p.His569Asp	1.29116	0.176069	12	-0.767356	1.67363
p.Asp571Ala	1.04597	0.112672	4	-1.97734	3.40047
p.Asp571Glu	0.914133	0.1761	5	-2.3266	2.57842
p.Asp571Val	1.16982	0.197693	5	0.332248	1.89345
p.Met572Ile	0.807574	0.169393	5	-1.77342	1.18371
p.Met572Leu	0.991096	0.199733	5	1.49057	4.74664
p.Met572Arg	1.24367	0.200726	13	-3.98636	1.7742
p.Met572Val	1.22174	0.274887	5	-2.36171	2.45757
p.Leu573Met	1.11351	0.184851	12	3.31788	2.03909
p.Leu573Pro	1.2496	0.255358	7	1.32639	1.78068
p.Leu573Val	0.731534	0.18471	5	-1.05115	3.18917
p.Gly574Asp	0.818284	0.113436	7	4.77845	2.22315
p.Arg575Gly	1.04478	0.183413	5	2.84497	3.4986
p.Arg575Leu	1.007	0.246132	4	0.150863	1.17564
p.Arg575Pro	0.457134	0.09709	8	2.75288	3.52337
p.Arg575Gln	0.919975	0.221842	11	-0.263088	2.57023
p.Arg575Trp	0.57294	0.155135	11	-0.743366	2.67263
p.Ile576Phe	0.482052	0.0639382	8	-5.46651	4.34096
p.Ile576Leu	0.740922	0.0816788	4	-3.7558	5.69002
p.Ile576Met	0.248038	0.04045	8	-2.10093	7.16754
p.Ile576Asn	0.558213	0.130737	8	-0.0858557	2.97473
p.Ile576Ser	0.798638	0.0992422	5	2.27542	4.30405
p.Ile576Thr	1.19343	0.369042	5	1.44272	2.91122
p.Lys577Glu	0.212047	0.0597033	8	0.795559	4.05143
p.Lys577Met	0.24291	0.0501414	8	-1.69555	4.08795
p.Lys577Asn	1.05599	0.289748	7	0.372563	3.24857
p.Lys577Gln	0.462197	0.123699	8	2.24571	1.76288
p.Lys577Arg	1.01329	0.203158	5	3.84545	0.642687
p.Lys577Thr	0.338666	0.0735733	8	7.33731	1.13726
p.Ser578Gly	0.840627	0.140979	5	-4.3947	2.72005
p.Leu579Pro	1.25809	0.228616	5	1.17496	2.33691
p.Leu579Gln	0.984793	0.168532	11	0.749812	1.47798
p.Leu579Arg	1.03275	0.311274	6	-1.27973	1.64207
p.Gln580Glu	1.06227	0.258286	9	-1.73677	3.40029
p.Gln580Lys	1.34652	0.186724	4	2.57213	3.50106
p.Gln580Pro	0.96849	0.0590905	4	1.93796	4.22963
p.Gln580Arg	1.01227	0.274812	5	-1.6213	3.94479
p.Arg582Gly	1.06133	0.289676	4	10.8025	2.95128
p.Arg582Pro	0.958499	0.176391	9	4.21995	1.85723
p.Val583Glu	1.07828	0.230004	5	2.50528	4.77639
p.Gln585Pro	0.596158	0.0920507	9	1.34126	2.51602
p.Ile586Asn	0.621984	0.0871375	9	-0.487276	2.1534
p.Ile586Ser	1.13865	0.218572	5	6.37474	1.78209
p.Gly588Ala	0.925003	0.177305	5	-4.61373	2.98214
p.Gly588Cys	0.841854	0.189241	8	2.04522	1.73109
p.Gly588Asp	0.609056	0.11131	9	2.39383	2.74938
p.Gly588Ser	0.755846	0.152059	7	1.13895	2.51447
p.Gly588Val	1.12711	0.3325	5	4.39142	2.57564
p.Arg589Leu	0.685518	0.154085	8	2.0187	1.65132
p.Arg589Trp	0.954313	0.199401	6	-0.866151	3.12035
p.Gly590Glu	1.03874	0.0460516	4	1.16058	1.69355
p.Gly592Glu	1.03746	0.163132	5	2.78468	3.19061
p.Arg594Trp	0.716414	0.126562	7	1.46352	3.82988
p.Arg594Ser	0.578057	0.126313	8	2.81994	3.15198
p.Lys595Glu	0.44736	0.0979298	8	2.06512	4.52476
p.Lys595Met	1.09287	0.23405	6	3.36924	2.14304
p.Lys595Asn	0.867143	0.213715	5	1.12761	2.54944
p.Lys595Thr	0.999989	0.135693	4	2.70878	2.3757
p.Arg597Gly	0.774723	0.129884	7	-0.124769	2.93585
p.Lys599Glu	0.905362	0.190064	5	4.67633	3.03008
p.Lys599Asn	1.05357	0.183126	5	4.39701	3.68804
p.Asp601Asn	1.25086	0.1505	9	1.18651	1.82851
p.Gly603Arg	1.02226	0.256489	4	-0.0341119	2.67119
p.Ser614Arg	1.09212	0.175763	5	-0.827399	4.78224
p.Met615Thr	1.10103	0.291832	5	-2.42919	2.9997
p.Ile629Phe	0.369523	0.0989015	8	-2.19625	4.25277
p.Ile629Thr	0.329749	0.0602617	8	1.06906	1.38942
p.Lys632Glu	0.587421	0.0924568	8	0.211754	3.23372
p.Lys632Asn	1.00986	0.0884412	4	1.8526	0.210559
p.Lys632Arg	0.886448	0.0817644	4	-4.87531	0.0846291
p.Lys632Thr	1.00596	0.242841	5	-5.33697	2.2957
p.Leu633Met	0.645642	0.100034	7	-1.28424	2.83598
p.Leu633Pro	1.1766	0.36031	7	0.235778	2.47677
p.Leu633Arg	1.02703	0.22353	5	-3.87401	1.45531
p.Leu636Pro	1.084	0.0439942	4	2.99643	2.54847
p.Leu637Trp	0.953312	0.0576638	4	-1.77306	2.13954
p.Arg645Ser	0.991245	0.212728	6	-6.00727	2.66311
p.Ser646Pro	0.509094	0.0974	7	1.16467	6.60762
p.Ser651Gly	0.272111	0.0799989	8	5.19706	6.12804
p.Gln656Leu	1.23212	0.327008	4	-4.41065	3.18884
p.Gln656Pro	0.838	0.0805122	4	8.10179	2.68809
p.Gln656Arg	0.654787	0.0606796	8	0.319805	1.40517
p.Pro658Leu	1.05493	0.350129	6	-4.36679	3.89947
p.Asp667Val	0.296212	0.0387886	7	1.19533	3.42877
p.His669Asn	0.845747	0.134108	6	-3.21989	1.82417
p.Asp673Glu	0.586269	0.108679	10	-1.77189	2.51101
p.Ile686Phe	1.10994	0.337206	4	-3.10765	3.7787
p.Ile686Leu	0.731659	0.219962	10	-3.47011	2.54704
p.Arg688Leu	0.902499	0.339823	5	1.05152	4.58639
p.Val690Gly	0.931722	0.315705	10	-6.45846	1.72127
p.Val690Leu	1.18069	0.17101	10	0.916677	2.82076

## Sheet: Supplemental_Dataset_D
Supplemental_Dataset_D: Functional properties of co-expressing 153 variants (normal currents and large rightward shifts in V1/2 in the homozygous state) with WT
	Co-expression
Variant	Normalized current (Imut+wt/Iwt+wt, at +40 mV)	SEM (Imut+wt/Iwt+wt, at +40 mV)	Number of cells	Δ V1/2 (mV)	SEM (ΔV1/2)
p.His102Pro	0.887304	0.244944	4	-0.691151	3.04051
p.Ile105Leu	1.1765	0.414699	5	5.31712	3.72172
p.Phe106Leu	1.08256	0.152242	5	-5.2809	3.60431
p.Phe106Tyr	1.0227	0.161449	4	1.60952	1.71585
p.Leu107Phe	1.24558	0.221605	5	2.04283	4.02763
p.Leu108Pro	1.32337	0.146946	5	15.9335	4.26838
p.Val109Ile	1.2444	0.300656	6	12.1622	1.43477
p.Val109Leu	1.24971	0.39935	4	6.42638	2.22485
p.Phe110Tyr	1.30195	0.211598	4	3.15421	4.71601
p.Leu113Arg	0.842346	0.138342	10	-0.540646	2.11939
p.Leu113Val	0.762189	0.0900819	5	-3.80213	2.47903
p.Leu115Pro	1.02416	0.327766	5	9.9149	2.28
p.Ser116Cys	0.94054	0.205713	6	14.4737	4.27302
p.Thr120Ile	0.834574	0.254917	5	7.01716	4.96171
p.Gln125His	1.53166	0.170095	5	1.18137	2.23294
p.Leu132Arg	1.08718	0.3597	7	12.8503	2.0598
p.Leu133Phe	1.4635	0.158685	5	12.5717	2.61268
p.Leu133His	0.889153	0.199756	4	-7.0073	2.8191
p.Leu133Ile	0.79244	0.099902	10	13.8364	0.907224
p.Leu133Pro	0.839326	0.0775942	5	21.0683	2.75719
p.Leu133Arg	1.16579	0.185201	5	23.7778	1.05128
p.Leu133Val	1.26884	0.150694	3	8.51342	2.72375
p.Glu136Ala	0.790097	0.0902546	4	1.16192	2.51284
p.Glu136Gly	2.02437	0.367343	2	-5.80843	3.88538
p.Glu136Gln	1.27343	0.269611	6	7.85736	1.63642
p.Glu136Val	0.849701	0.14802	5	2.9011	3.57083
p.Phe143Tyr	1.64299	0.0815391	5	-4.5054	2.33266
p.Val149Phe	1.28134	0.0567599	3	1.50891	4.67252
p.Cys156Trp	1.08773	0.507213	4	2.90458	4.04798
p.Lys172Glu	1.08304	0.121819	7	-9.96798	1.14097
p.Lys172Gln	1.29016	0.24955	5	-3.98268	4.02461
p.Pro173Ser	0.840732	0.20614	5	2.49517	4.35233
p.Pro173Thr	1.15779	0.292611	4	4.88982	5.86896
p.Cys175Phe	0.737484	0.201271	4	6.45345	6.48116
p.Cys175Arg	1.19116	0.26183	4	19.7257	1.54304
p.Cys175Tyr	0.872122	0.10449	5	4.46754	2.73565
p.Ile177Asn	1.09958	0.102316	5	-5.17216	4.04339
p.Ile177Ser	1.03052	0.3401	7	2.0291	2.99843
p.Asp178Ala	1.18178	0.245491	5	15.693	1.43729
p.Asp178Glu	1.56005	0.265177	4	11.9377	2.01247
p.Asp178His	1.08775	0.228258	6	4.3227	1.83237
p.Asp178Tyr	1.0408	0.226568	8	5.25606	3.34651
p.Ile180Met	1.33096	0.279962	5	3.39827	1.05534
p.Val181Ala	0.94806	0.225791	6	1.13627	2.51187
p.Val181Gly	1.00543	0.173241	6	2.86622	2.35152
p.Ala184Asp	1.50205	0.257433	4	2.25364	3.01512
p.Ala184Val	0.969843	0.271855	6	3.292	4.67149
p.Val188Asp	1.48109	0.175537	5	8.34673	1.6991
p.Val188Phe	1.18322	0.21716	3	10.7268	2.27929
p.Val188Gly	1.30006	0.174651	6	1.17751	4.33555
p.Val188Leu	1.07604	0.0268375	5	14.765	1.48559
p.Ile189Asn	1.3264	0.151053	6	3.94064	1.94058
p.Ala191Glu	1.29889	0.233401	8	9.96165	1.98058
p.Ala191Ser	1.09971	0.330362	5	7.91958	2.55516
p.Gly192Asp	1.4678	0.159372	4	3.92818	2.61578
p.Thr193Pro	0.9198	0.208291	4	-0.128893	1.09047
p.Gln194Pro	0.782746	0.250039	5	16.7288	0.828209
p.Asn196Ser	1.22929	0.11934	5	-0.807306	2.5684
p.Asn196Thr	1.35466	0.357351	5	3.2327	4.3354
p.Asn196Tyr	0.68355	0.141355	6	-2.24267	6.67276
p.Ile197Phe	0.789979	0.0995042	5	16.674	6.02503
p.Ile197Leu	0.941685	0.214259	5	7.1651	2.54548
p.Phe198Ile	0.78368	0.145068	10	2.61424	1.81321
p.Ser201Ala	0.723979	0.0383982	4	7.9944	1.19571
p.Ser201Phe	1.04088	0.334628	4	19.2477	5.68239
p.Leu203Pro	1.44248	0.232266	4	-0.454885	2.91123
p.Arg204Cys	0.887264	0.125635	5	1.53381	6.19445
p.Met206Thr	0.885777	0.183959	5	1.54896	2.59683
p.Met206Val	1.20017	0.370605	4	8.57611	1.71589
p.Phe208Cys	1.15999	0.205584	9	1.75296	2.22113
p.Phe208Ser	1.02327	0.266912	5	9.29472	1.57341
p.Phe208Tyr	1.22267	0.20517	3	-5.02551	2.82225
p.Leu209Pro	1.20111	0.144446	5	0.906212	1.25313
p.Leu209Gln	1.20883	0.131545	4	-0.0268015	3.18949
p.Gln210Glu	1.0908	0.128023	5	-2.46234	2.2398
p.Gln210Lys	1.5334	0.306376	5	19.1913	1.00358
p.Ile211Ser	1.22728	0.374631	4	12.7832	5.19879
p.Ile211Thr	1.01535	0.183282	6	7.52612	0.97969
p.Ile211Val	1.25019	0.0523194	5	15.4085	2.98106
p.Leu212Gln	1.51743	0.266911	4	16.9117	4.33487
p.Arg213Cys	0.888778	0.213549	4	16.0599	5.92605
p.Arg213Gly	1.29748	0.226825	5	5.54238	1.49583
p.Arg213His	0.818307	0.229052	4	21.9189	5.52697
p.Arg213Ser	0.800569	0.493609	4	0.41312	7.6501
p.Met214Thr	0.845259	0.216565	5	20.1762	3.63773
p.Met214Val	0.846559	0.334483	4	28.1693	4.73772
p.Val215Gly	0.867723	0.213424	6	14.4435	2.88994
p.Arg216Cys	0.809838	0.0601145	4	18.4855	3.15086
p.Arg216His	0.994604	0.305123	4	20.7573	4.72609
p.Met217Thr	1.49282	0.0918204	5	1.29591	1.87605
p.Asp218Gly	1.04445	0.251909	5	15.4192	2.87578
p.Arg219Gly	1.3027	0.303249	7	-2.26897	3.35874
p.Arg219His	1.4629	0.268591	5	2.65861	3.55307
p.Arg219Leu	1.26097	0.250626	6	11.1219	2.70672
p.Arg220Cys	0.975708	0.291885	10	1.94179	1.9581
p.Gly221Cys	0.943185	0.282797	5	2.1254	3.98065
p.Gly221Ser	0.982499	0.13491	4	2.595	2.9257
p.Thr223Ile	0.919928	0.179605	5	11.6844	4.37951
p.Thr223Pro	0.776398	0.197691	5	21.7677	3.93484
p.Thr223Ser	0.872444	0.200032	7	7.98374	3.75724
p.Trp224Leu	1.22687	0.24727	5	11.6036	1.97461
p.Lys225Glu	1.42439	0.329025	5	-0.564874	4.78807
p.Lys225Asn	1.1428	0.288858	6	2.92081	2.13566
p.Lys225Gln	0.992054	0.296161	5	2.79581	3.96464
p.Lys225Thr	1.14783	0.271704	5	7.53307	1.0597
p.Gly228Arg	0.92257	0.137232	3	-2.51835	3.57326
p.Val231Phe	1.13074	0.165532	8	4.20511	4.99456
p.Tyr232Asn	0.980681	0.212487	6	-6.80966	3.60033
p.Lys236Arg	0.813315	0.275829	5	4.53251	1.72777
p.Lys236Thr	1.47632	0.173804	5	-1.6423	4.03321
p.Leu238Met	0.802827	0.163535	6	5.38474	2.66793
p.Ile239Ser	0.984183	0.14392	5	8.35287	2.26671
p.Thr240Pro	0.907969	0.0504456	5	6.11473	3.69849
p.Tyr243His	1.28289	0.3257	4	1.17236	3.65126
p.Gly245Trp	1.18588	0.0556503	5	5.38066	2.75939
p.Leu249Val	1.36318	0.296511	5	4.88282	2.94443
p.Phe251Tyr	1.23877	0.23529	8	-7.50751	2.14069
p.Ser253Thr	0.773766	0.105936	4	8.58228	1.97386
p.Phe254Ser	1.20794	0.41368	5	-8.95278	6.6515
p.Tyr257Phe	1.50342	0.153006	5	-3.47779	4.9814
p.Ser269Cys	0.853293	0.22511	7	-1.36374	4.37399
p.Ala271Gly	1.15486	0.152319	12	7.33784	1.57474
p.Ala271Ser	1.06273	0.083211	3	13.4631	0.248546
p.Ala271Thr	0.808587	0.0585799	7	4.99246	2.43444
p.Thr278Met	1.2322	0.310402	5	2.2075	2.79097
p.Thr290Ser	1.20643	0.0978561	5	1.31448	1.6897
p.Trp294Cys	0.860729	0.147873	5	7.39466	1.24532
p.Phe310Ser	1.16503	0.28616	5	7.09544	4.16843
p.Phe310Val	1.14523	0.237574	12	3.81612	2.22438
p.Lys325Met	1.10201	0.368145	5	7.82143	3.02474
p.Lys333Glu	0.974812	0.361001	4	0.364838	2.57663
p.Glu378Ala	1.00882	0.119447	8	8.69027	1.66722
p.Ala380Asp	1.12067	0.176715	8	-0.613222	1.09232
p.Ala402Ser	1.02892	0.156096	8	-0.593625	2.50929
p.Val415Ala	1.05206	0.130853	8	0.146053	2.11511
p.Thr424Ser	0.782662	0.0954439	6	-5.39072	3.86748
p.Ser425Ala	0.9017	0.1548	14	11.3976	1.6632
p.Asp438Asn	1.00449	0.262447	8	-8.70746	4.70853
p.Arg441Ser	1.43603	0.163205	5	-8.89372	2.27731
p.Ser452Phe	1.02885	0.237052	5	4.21928	2.46448
p.His455Pro	0.852355	0.170057	7	8.21922	1.8554
p.Arg496Lys	1.14024	0.3245	8	4.91101	1.68663
p.Val523Gly	0.979425	0.155795	6	-3.39284	2.96574
p.Asp525Tyr	1.33752	0.258517	6	-7.73339	1.72266
p.Ser536Cys	1.12792	0.265709	6	-1.88912	3.16237
p.Ile539Asn	1.02965	0.27167	8	-1.75567	2.07752
p.Ile539Thr	0.885512	0.182348	8	1.14065	2.67163
p.Leu540Phe	0.971326	0.152025	7	4.83547	2.48898
p.Leu540His	0.858155	0.130834	8	-1.80098	2.37575
p.Ala545Asp	0.782318	0.120575	8	-1.86641	1.67504
p.Arg618Cys	0.994142	0.0993813	7	4.56035	3.28081
p.Glu623Asp	1.03754	0.247182	7	1.15049	1.27941
p.Glu623Gly	1.16906	0.238272	6	-0.263775	2.90224

## Sheet: Supplemental_Dataset_E
Supplemental_Dataset_E: Functional properties of co-expressing 43 current-enhanced variants with WT
	Co-expression
Variant	Normalized current (Imut+wt/Iwt+wt, at +40 mV)	SEM (Imut+wt/Iwt+wt, at +40 mV)	Number of cells	Δ V1/2 (mV)	SEM (ΔV1/2)
p.Arg72Cys	1.14204	0.29885	5	-2.20341	1.2174
p.Lys78Glu	1.48554	0.379027	6	-4.10242	1.4452
p.Asn85Asp	3.06713	0.571811	6	-6.31938	3.27825
p.Asn85Thr	1.44938	0.568585	4	0.782492	4.89475
p.Asn85Tyr	3.0237	0.414495	6	1.57064	1.56315
p.Asn89Asp	1.27312	0.35226	4	1.92296	2.87145
p.Val90Ala	1.19921	0.124339	3	2.21658	2.222
p.Val90Gly	1.18805	0.193212	4	4.66716	1.92492
p.Arg93Leu	3.03554	0.316624	6	-5.77603	1.63941
p.Arg93Gln	2.94688	0.776048	6	-6.13746	4.97689
p.Val114Ala	2.80904	0.514043	7	2.12599	1.12946
p.Leu132Ile	1.36915	0.282305	9	2.72475	2.06306
p.Glu136Asp	1.37841	0.437199	7	9.91554	4.10309
p.Cys156Gly	3.448	0.674564	7	2.281	1.52202
p.Cys156Ser	3.20635	0.681108	7	0.494145	2.97424
p.Cys157Ser	1.04454	0.315524	5	-1.2793	3.23982
p.Cys158Phe	3.00799	0.541787	9	0.126861	2.82838
p.Cys158Trp	1.41885	0.490885	6	7.31575	2.28022
p.Arg159Gly	3.05877	0.660296	9	-2.88602	2.61857
p.Arg159His	2.67325	0.416813	10	-5.95964	2.60375
p.Arg159Leu	2.78732	0.611276	8	-1.00618	1.9268
p.Arg159Pro	2.65454	0.402658	9	-1.07622	2.30783
p.Arg159Ser	1.87168	0.278086	8	-7.01078	1.76977
p.Arg161Gly	3.73707	0.738262	8	-4.72896	2.20487
p.Phe174Val	2.70897	0.288464	7	-11.5262	2.15891
p.Asp218Glu	1.56741	0.351632	6	18.2508	1.53653
p.Arg219Pro	1.55666	0.272018	7	-6.92792	2.18377
p.Thr223Ala	1.89319	0.330635	6	12.4955	0.919462
p.Leu227Val	4.08167	0.550883	7	-4.7995	14.7344
p.Val231Leu	2.20465	0.383245	12	4.28791	1.18149
p.Trp242Cys	2.83998	0.511539	7	-0.91221	2.83129
p.Trp242Leu	1.55353	0.413154	6	1.36481	2.68276
p.Val326Ile	4.43884	0.698609	7	9.10722	2.41722
p.Ser371Arg	1.49076	0.362389	7	-2.94284	1.44984
p.Tyr556Phe	2.11919	0.402734	6	1.23198	1.7309
p.Lys559Arg	2.65407	0.402909	6	-4.72433	2.45422
p.Val561Ala	4.93307	0.808342	6	-16.5386	3.26489
p.Ser566Pro	3.3671	0.781506	6	-13.7661	2.55276
p.Gly568Arg	5.62629	0.684947	9	-18.7405	1.73891
p.Gly568Ser	3.83847	0.495245	5	-8.05009	2.05134
p.Leu573Arg	3.69857	0.619199	7	-7.39338	0.99162
p.Gly574Arg	3.82035	0.648206	7	-7.98646	2.1171
p.Asp584Tyr	1.97512	0.576689	7	-6.46038	2.14743

## Sheet: Supplemental_Dataset_F
Supplemental_Dataset_F: Functional properties of co-expressing 76 variants (normal currents and large leftward shifts in V1/2 in the homozygous state) with WT
	Co-expression
Variant	Normalized current (Imut+wt/Iwt+wt, at +40 mV)	SEM (Imut+wt/Iwt+wt, at +40 mV)	Number of cells	Δ V1/2 (mV)	SEM (ΔV1/2)
p.Gly66Cys	1.0305	0.152294	6	2.16633	0.72858
p.Ser116Pro	1.32025	0.0425656	5	-15.6359	1.9603
p.Val117Gly	1.13996	0.211766	4	-13.4466	4.25689
p.Val117Met	1.2218	0.184674	7	-7.73243	2.52701
p.Ser119Pro	0.96245	0.221467	10	-2.998	2.10759
p.His124Asp	1.09428	0.370158	4	4.86746	2.52797
p.Cys131Gly	0.697622	0.0753646	8	-8.84525	3.89502
p.Leu135Met	1.61236	0.220483	4	-0.0628212	2.26536
p.Phe137Cys	1.29152	0.137337	3	0.130374	3.02702
p.Ile140Ser	1.00026	0.44702	10	6.79099	3.73468
p.Arg159Cys	0.895092	0.0472073	6	-3.99225	4.76768
p.Ile177Phe	1.38079	0.170097	8	-2.56313	2.31165
p.Val181Leu	1.25985	0.320417	4	-8.34341	5.04796
p.Ala190Val	1.21766	0.228166	8	-8.76821	3.33763
p.Ala191Val	1.27542	0.232308	10	-9.91061	3.50704
p.Gly192Arg	1.03701	0.0633504	6	-9.12745	4.65563
p.Gly192Ser	1.12611	0.502021	5	7.81149	4.11688
p.Gly195Cys	0.742252	0.0382743	4	-6.20825	1.25718
p.Phe198Tyr	1.00418	0.232587	5	1.60514	1.48462
p.Ala199Gly	1.31598	0.271656	5	-13.4929	2.55262
p.Ala199Ser	1.06605	0.248744	8	-5.49314	4.56003
p.Ala199Thr	1.25795	0.176142	5	-0.135122	1.65409
p.Thr200Lys	1.1095	0.0576487	5	-4.91033	2.27557
p.Ala202Pro	1.04016	0.109873	4	-13.5015	4.1732
p.Gln210Leu	0.862757	0.0944799	5	2.90736	1.21422
p.Arg216Ser	0.869663	0.241576	4	3.15035	0.538437
p.Ser235Arg	1.42906	0.249366	4	-3.79639	4.02863
p.Gly245Ala	1.53628	0.127968	6	-4.59263	2.17723
p.Lys261Thr	1.02498	0.279534	8	-6.76427	1.1393
p.Leu313Met	0.988856	0.297123	5	-7.28536	3.56334
p.Leu313Val	0.985613	0.198111	5	-9.20652	1.1604
p.Ile317Thr	0.91589	0.3313	4	-5.57857	1.61362
p.Gly319Ser	1.19646	0.0507439	6	-8.15811	1.36407
p.Ala323Gly	0.892359	0.131414	5	0.406873	3.37064
p.Ala323Ser	1.11616	0.277718	6	-4.89748	2.60959
p.Leu324Met	0.913088	0.110544	6	-5.3328	4.1626
p.Val326Phe	1.29243	0.280773	4	-10.6797	3.46124
p.Val326Leu	0.816755	0.175207	6	-10.183	3.61385
p.Gln327Lys	1.37473	0.331336	5	-1.02192	3.77483
p.His330Arg	1.27661	0.198338	5	-10.282	2.47407
p.Pro341Leu	0.96034	0.292107	5	-6.27991	8.27835
p.Ala364Pro	1.31735	0.208004	4	-5.15249	2.80255
p.Tyr367Phe	1.26947	0.18177	7	-0.533313	2.06096
p.Phe383Ser	1.18671	0.327498	8	-2.04049	1.59153
p.Cys427Arg	0.958942	0.297798	7	-3.49809	1.96341
p.Gln446Pro	1.10236	0.231241	7	3.11819	3.06769
p.Thr449Ala	0.789045	0.171902	8	-1.83597	3.09412
p.Thr449Arg	1.1642	0.176152	7	-3.85009	2.9736
p.Leu456Arg	1.42282	0.166574	5	-7.16083	4.07449
p.Ser464Thr	1.05424	0.208687	5	-3.86799	1.60586
p.Gly471Ala	1.22093	0.22728	8	-5.06502	3.80713
p.Lys478Asn	1.17686	0.152388	8	-6.79211	1.57949
p.Phe485Ser	1.05289	0.199134	7	-3.53712	3.62962
p.Asp487Val	0.991267	0.168513	7	-4.02721	3.70499
p.Arg496Ile	1.0438	0.136042	8	-6.97886	0.70746
p.Asp524Gly	1.24463	0.21838	6	-3.17504	3.98041
p.Asp560Glu	1.05896	0.168138	7	-4.35309	3.89452
p.Gly568Ala	0.914561	0.185026	8	-0.334945	2.895
p.Asp571Gly	1.3008	0.17005	6	1.13513	2.20856
p.Gly647Ser	1.06326	0.125013	7	-6.33437	3.15735
p.Ser649Ala	1.30011	0.101643	5	-10.2565	3.7879
p.Ser651Ile	0.835165	0.200254	7	0.838586	3.51697
p.Ala654Asp	1.41364	0.16072	7	-10.7733	2.78353
p.Ala654Ser	0.757407	0.136072	8	4.86748	1.81933
p.Pro662Ser	1.21608	0.18	8	-1.61656	2.63366
p.His669Asp	1.18904	0.100385	7	-8.25985	2.21533
p.Val679Ile	0.950085	0.171599	6	-1.07266	1.41916
p.Thr683Met	0.989462	0.142075	7	-2.24062	1.03582
p.Leu684Arg	0.885005	0.103564	8	-2.41749	0.896957
p.Ser685Cys	0.76605	0.105092	8	-4.83863	2.62687
p.Ser685Arg	1.31131	0.329767	7	-1.04684	1.62032
p.Ser689Ala	1.14094	0.213913	7	0.558568	3.21028
p.Ser689Pro	1.27165	0.11085	8	1.52096	2.51016
p.Ser691Ile	0.72752	0.108611	7	-2.63672	2.46618
p.Met694Leu	1.21313	0.187504	8	-4.62139	4.67069
p.Met694Val	1.0535	0.248037	8	0.466171	1.23476

## Sheet: Supplemental_Dataset_G
Supplemental_Dataset_G: Functional properties of 29 synonymous variants when expressed alone
	Single expression
Variant	Normalized current (Imut/Iwt, at +40 mV)	SEM (Imut/Iwt, at +40 mV)	Number of cells	Δ V1/2 (mV)	SEM (ΔV1/2)
p.Leu133Leu	0.912851	0.3052	6	12.7998	0.7176
p.Glu146Glu	0.859383	0.1934	5	3.42814	0.8172
p.Gly155Gly	1.0639	0.1846	6	5.1863	1.432
p.Ala190Ala	0.974668	0.3066	5	4.69205	3.206
p.Leu227Leu	1.0044	0.2549	6	-1.46443	1.839
p.Ala259Ala	1.1385	0.2672	6	-0.479024	1.514
p.Leu281Leu	1.12354	0.1511	6	1.96128	1.317
p.Pro291Pro	0.668428	0.0219	5	-1.29159	2.825
p.Thr293Thr	1.17453	0.2264	6	2.91855	1.301
p.Leu318Leu	1.07215	0.1162	6	-0.723596	2.098
p.Leu324Leu	0.962431	0.2003	6	0.957225	1.414
p.Asn344Asn	0.863633	0.138	6	-3.40623	2.253
p.Thr355Thr	0.810933	0.0388	6	-2.14076	2.174
p.Ser375Ser	1.17965	0.2778	6	-2.48846	2.062
p.Pro396Pro	1.20093	0.281	6	2.41066	2.122
p.Pro405Pro	0.79355	0.1185	6	-0.60295	3.175
p.Pro413Pro	0.803797	0.1267	5	5.52306	1.908
p.Ala416Ala	1.2949	0.3105	4	4.67575	6.592
p.Gly471Gly	0.908939	0.3217	6	4.49705	1.27
p.Thr474Thr	0.746981	0.2495	5	3.05683	2.14
p.Ala506Ala	0.915557	0.0697	5	0.843139	2.172
p.Asp524Asp	0.795852	0.1934	5	-2.84856	1.934
p.Leu553Leu	1.03506	0.3574	6	-1.50562	2.807
p.Pro555Pro	0.924303	0.164	4	-0.678307	1.659
p.Tyr556Tyr	0.961068	0.3838	5	4.76513	6.377
p.Asp557Asp	0.996375	0.3915	6	-0.79768	0.8699
p.Gly568Gly	0.971102	0.2408	5	-1.93227	1.597
p.Pro662Pro	0.838246	0.2893	6	-3.54996	1.716
p.Asp676Asp	0.910318	0.1745	5	-9.64438	1.436

## Sheet: Supplemental_Dataset_H
Supplemental_Dataset_H: Functional properties of 6 frameshift variants and 1 stop-gained variant when expressed alone and co-expressed with WT
		Single expression			Co-expression
Nucleotide change	Variant	Normalized current (Imut/Iwt, at +40 mV)	SEM (Imut/Iwt, at +40 mV)	Number of cells	Normalized current (Imut+wt/Iwt+wt, at +40 mV)	SEM (Imut+wt/Iwt+wt, at +40 mV)	Number of cells	Δ V1/2 (mV)	SEM (ΔV1/2)
c.211_223del13	p.Q71fs	0.0035	0.005	6	0.5023	0.1091	9	-0.9739	2.6705
c.211delC	p.Q71fs	-0.017	0.0025	5	0.7339	0.0989	7	-6.7758	2.3961
c.259_267del9	p.V87-N89del	-0.0319	0.0091	6	0.2553	0.0677	9	1.7441	5.1951
c.664_681del18	p.G222-227del6	0.0076	0.008	6	0.4651	0.0784	8	-8.6747	4.3963
c.806_808del3	p.S269del	-0.0034	0.0116	6	0.5537	0.0938	4	-5.76	0.223
c.1044_1051del8	p.A349Pfs	0.0362	0.0221	6	0.3997	0.0448	10	0.5536	6.2973
c.725G>A	p.W242X	-0.0078	0.0189	6	0.4681	0.1297	8	1.3418	3.3188
