# Supplementary material for: Proactive functional classification of all possible missense single-nucleotide variants in KCNQ4
Source: HighWire-hosted journal article supplement (doi:10.1101/gr.276562.122), 2022-06-27
Supplement: Supplemental_Methods.docx [file Supplemental_Methods.docx]

**Supplemental Methods**

**Plasmid construct and point mutations**

Complementary DNAs of human *KCNQ4* (NP_004691.2, isoform a) were purchased from GeneCopoeia (EX-U0210-M98-5). The transcript variant - isoform a is the longest known transcript and is used by the common variant databases, such as DVD and gnomAD databases. Another transcript variant – isoform b showed a minority transcript (Kubisch et al. 1999). WT *KCNQ4* and variants used in patch-clamp recordings were fused with EGFP at the C-terminus as a transfection marker. For potential possible study of the subcellular localization of WT and variants, a modified c-Myc tag was inserted in the extracellular domain of the KCNQ4 channel as described in the previous study (Kim et al. 2011). All *KCNQ4* missense SNV plasmids used in the electrophysiological recordings were generated from the WT *KCNQ4* CDS with a modified c-Myc tag in the plasmids EX-U0210-M98-5. For the co-transfection experiment, EGFP was substituted with mCherry by homologous recombination method and verified by Sanger sequencing. Additionally, full-length cDNAs encoding WT *KCNQ4* were also engineered in the vector pIRES2-EGFP as a control.

All possible *KCNQ4* 4,085 missense SNVs, the sum of about 4-7 substitutions for each of 695 amino acids, were calculated through MATLAB based on the codon sequence of *KCNQ4* (NM_004700.4). Point-mutated plasmids were constructed based on PCR and homologous recombination and were Sanger sequenced to confirm that the mutation site was included and no other mutations were introduced (Supplemental Fig. S2A). Briefly, one pair of the mutation-introduced primers (F1 and R1) for the 4-7 missense SNVs of each amino acid was specific, and each amino acid used the same reverse primer and different forward primers with the different mutant bases. Another pair of universal primers (F2 and R2) was designed around the middle of the vector. The mutation-introduced fragment 1 was amplified by the mutation-introduced primer F1 and universal primer R2, while the other fragment 2 was amplified by the same primer R1 for each amino acid site and universal primer F2. Fragment 1 and fragment 2 with overlapped sequences of 20 bp on both 5’- and 3’- end, respectively, were mixed in a ratio according to the instructions (Vazyme: C112-02) and incubated with recombinase Exnase II at 37℃ for 30 min. Each variant plasmid was obtained by homologous recombination of two fragments. In general, all the variants for each amino acid site only need 4-7 mutation-introduced fragments and one universal fragment. It took about 3-4 days to complete a round of plasmid construction, and each person constructed about 20-30 missense variant plasmids of 4-5 amino acids per round. Normally, no more than 3-5 plasmids were wrong in each round. For the wrong mutation, we would pick another single colony or undergo PCR again with adjusted primers. Taking the example shown in Supplemental Fig. S2C, the primers required for two rounds of plasmid construction within one week were designed on Monday. Two rounds of point mutation plasmid construction this week were carried out on Tuesday and Thursday, and 20-30 missense SNVs plasmids of 4-5 amino acids were constructed and sequenced each round. Generally, each participant completes two rounds of plasmid construction per week, containing about 40-60 missense SNVs of 8-10 amino acids. Totally, H.Z., X.Y., G.L., W.Z., and F.Y. generated about 1,100, 1,100, 800, 700, and 400 variant plasmids in 8, 8, 6, 4, and 3 months, respectively.

**CHO-K1 cell culture and transfection**

Chinese hamster ovary (CHO) cells were cultured in DMEM/F12 medium (Gibco), supplemented with 10% fetal bovine serum (Gibco) and penicillin (50 IU/mL)/streptomycin (50 μg/mL) (Gibco) at 37°C with 5% CO2. HEK293T cells were cultured in DMEM medium (Gibco) containing 10% fetal bovine serum (Gibco) and penicillin (50 IU/mL)/streptomycin (50 μg/mL) (Gibco) at 37°C with 5% CO2. Cells were seeded in 12-well plates and cultured for 24 hours before transfection (Supplemental Fig. S2B). The number of wells for seeding cells is determined by the number of variants to be performed in patch-clamp recordings and each person could take the recordings of 6-15 variants a day. Cells were transfected with WT or *KCNQ4* variant plasmids using Lipofectamine 3000 reagent (Thermo Fisher Scientific), according to the manufacturer’s instructions. For electrophysiological experiments, CHO-K1 cells were transfected with 1.6 μg WT or *KCNQ4* variant plasmids per well (12-well plate) with fusion EGFP as a transfection marker. For co-transfection experiments, we used *KCNQ4*-Myc-mCherry (fusion with mCherry at the C-terminus) as WT instead of *KCNQ4*-Myc-EGFP to distinguish the different fluorescent colors between WT and variants. Cells were transfected with 0.8 μg *KCNQ4*-Myc-mCherry and 0.8 μg variant plasmids (fusion with EGFP at the C-terminus) per well.

**Electrophysiological recordings**

Cells selected for recordings had basically moderate size and fluorescence intensity. In general, the cells we choose to record were similar in size and fluorescence intensity. Patch-clamp experiments were performed at room temperature (20°C-25°C). Currents were recorded using Axopatch 200B and MultiClamp 700B ampliﬁer (Axon Instruments, USA) and Digidata 1550B (Axon Instruments, USA). Currents were sampled at 10 kHz. All data were low pass filtered at 1 kHz. Before acquiring currents, the cell membrane capacitance (Cm) and series resistance (Rs) were compensated using a circuit of the patch-clamp amplifier. Series resistances were compensated 70-90% and no less than 15 MΩ. All current trace data were analyzed using Clampﬁt 10.6 (Molecular Devices, USA). For whole-cell recording, borosilicate glass pipettes (BF150-86-10, Sutter Instrument) were pulled using a Flaming/Brown micropipette puller (P-97, Sutter Instrument). Patch electrodes with 4-7 MΩ resistance were used. The bath solution for the whole-cell patch-clamp contained (in mM): 145 NaCl, 4 KCl, 1.8 CaCl2, 0.5 MgCl2, 10 HEPES, 5 D-glucose, pH 7.4, with NaOH. The pipette solution contained (in mM): 140 KCl, 1 MgCl2, 10 HEPES, 10 EGTA, 1 CaCl2, 4 K2ATP, pH 7.2, with KOH.

The step pulse protocol used for KCNQ4 channel recordings started from a holding potential of -80 mV, depolarized for 1s from -100 mV to +40 mV with 20 mV increments, and followed by a tail pulse at -50 mV for 0.5 s. P/N leak subtraction was performed. The current-voltage relationship was generated by the average current of the last 25 ms of the activation process and fitted according to the step potential. Continuous curves were generated by plotting the normalized tail current against membrane potentials using the Boltzmann function I/Imax = 1/(1+ (exp(V1/2-Vm)*k*)), where I is the magnitude of the tail current, Imax is the maximum current magnitude, V1/2 is the half-activation voltage, Vm is the membrane potential, and *k* = RT/zF is the slope factor. To measure the kinetics of activation of KCNQ4 channel, current traces at +40 mV were fitted with a double-exponential function of the following equation: I(t) = A1 exp (−t/*τ*1) + A2 exp (−t/τ2) + C, where I(t) is the recorded current at time t, A1 and A2 represent the current amplitudes of the fast and slow activation components, respectively, τ1 and τ2 are the time constants of the fast and slow activation components, respectively, and C is the amplitude at which the activation starts. The deactivation time constants were calculated by fitting the deactivating current traces with a single exponential function at -50 mV.

Electrophysiological experiments were performed 24 hours after transfection. Each individual could take recordings of 6-15 variants a day and three days one week. Plasmids construction and patch-clamp recordings were performed alternately during the week. Taking the example shown in Supplemental Fig. S2C, cell passage was performed on Monday, Wednesday, Friday, and Saturday, and cell transfection was performed on Sunday, Tuesday, and Thursday, to ensure that electrophysiological recording experiments would be performed on Monday, Wednesday, and Friday. Generally, the function of about 25-35 variants was detected by electrophysiological recordings for each participant over the three days. Overall, H.Z., X.Y., G.L., W.Z., F.Y., and H.L. recorded the electrophysiology of about 1,200, 1,050, 800, 500, 400, and 150 missense variants when expressed alone in 15, 15, 10, 8, 4, and 2 months, respectively. H.Z., X.Y., and G.L. recorded the electrophysiology of about 500, 600, and 150 missense variants when co-expressed with WT channels in 7, 7, and 2 months, respectively.

**Data exclusion and repeat criteria for electrophysiological recordings**

Current amplitudes were analyzed from recording cells that satisfied the following quality control criteria: seal resistance ≥ 500 MΩ, series resistance ≤ 15 MΩ, and cell capacitance between 5 to 25 pF. The capacitances of the cells we chose to record were mostly around 8-15 pF. Data were also removed from the analysis if the following problems exist: (1) electrically unstable cells (baselines were unstable); (2) cells with high leak currents resulting from the loss of seal; (3) cells with reduced currents resulting from poor cell state (WT currents as the control); (4) cells with obvious current run-down. Generally, about 20-30% of the cells that successfully formed the whole-cell recording mode met at least one of the above four criteria and were excluded. In the remaining 70-80% of the data, at least three cells for each variant were available for analysis.

For variants with current amplitudes similar to the WT currents when expressed alone, we generally only transfected once and recorded at least three cells with high quality. Exceptionally, for variants with large variations in current amplitudes, we repeated the electrophysiological recording experiment of these variants on another day. For variants with significantly enhanced or reduced currents when expressed alone (e.g., peak current < 0.54 of WT or > 2.08 of WT), to ascertain that this change was caused by mutations, the electrophysiological recording experiments of these variants were repeated in at least two different days and at least three cells were recorded each time except variants in the pore region. More significantly, to ensure the reliability of co-transfected data, generally more than 6 cells were recorded by two individuals on different days. If there is a significant difference between the results obtained from two individuals, we would repeat the recordings on another day. WT KCNQ4 channels were not transfected and recorded in parallel with each batch of variants. We transfected and recorded WT channels every week as a control. Overall, the recording results of WT channels each week showed no significant difference and the functional properties of WT channels are relatively stable, which ensures the reliability of the comparison of the function of each variant and WT.

**Variant functional classification**

*k*-means clustering was used to divide all 4,085 missense SNVs into three groups based on the normalized peak current values (Imut/Iwt) recorded at +40 mV of each variant (Supplemental Table S2). *k*-means clustering is the most widely used classification algorithm to divide a data set into K number of predefined groups with an iterative process (Jain 2010). After predefining K groups to the data set, each group will determine a cluster center by minimizing the sum of the squared distance between each point and the corresponding cluster centroid. The cutoff value between different groups was generated after variants were clustered into expected groups. According to the current distribution trend of all variants, we classify all variants into three categories based on the magnitude of current values by *k*-means clustering and named ‘reduced current’, ‘normal current’, and ‘enhanced current’. Each category contains 915, 3,127, and 43 variants with the cluster centers of 0.09, 1.00, and 3.16, respectively (Supplemental Table S2). We set the mean of the cluster centers of each adjacent two groups as the cutoff value, that is, one cutoff value between variants with reduced currents and normal currents is 0.54 and the other cutoff value between variants with normal currents and enhanced currents is 2.08.

The activation curves shifting toward more positive potential (rightward shifts) suggest that the channels were more difficult to activate and were considered as loss-of-function. In contrast, the activation curves toward more negative potential (leftward shifts) demonstrate that the channels were more easily to activate and were considered as gain-of-function. Referring to the analysis method of V1/2 in predicting the function of *KCNQ1* VUSs (Li et al. 2017) and in the functional reclassification of *SCN5A* variants (Glazer et al. 2020), as well as the limited recorded cells for each variant in our study, we adopted a change of 10 mV as a criterion for functional classification. Variants with < 10 mV shifts in V1/2 relative to the WT were considered to have no effect on the channel gating properties. Variants with > 10 mV shifts in V1/2 relative to the WT channel were considered to have a strong effect on the channel gating properties (> 10 mV rightward shift: loss-of-function; > 10 mV leftward shift: gain-of-function).

Combining the peak currents and half-activation voltage properties, we classified all 4,085 variants into three categories: loss-of-function (LOF), normal function, and gain-of-function (GOF) (Supplemental Table S3). The changes in currents are the primary consideration for functional classification, followed by the V1/2. Variants meeting any of the following conditions were classified as loss-of-function variants: 1) reduced currents (Imut/Iwt ≤ 0.54); 2) normal currents (0.54 < Imut/Iwt < 2.08) and > 10 mV rightward shifts in V1/2 relative to the WT. Variants with normalized currents (0.54 < Imut/Iwt < 2.08) and ≤ 10 mV shifts in V1/2 relative to the WT were classified as normal function. Variants meeting any of the following conditions were classified as gain-of-function variants: 1) enhanced currents (Imut/Iwt ≥ 2.08); 2) normal currents (0.54 < Imut/Iwt < 2.08) and > 10 mV leftward shifts in V1/2 relative to the WT.

**Generation of *Kcnq4* knock-in point mutant mice and genotyping**

All point mutant knock-in mice (p.G288R, p.L250R, p.D273Y, p.S202C, and p.A155T) in a C57BL/6J background were obtained by CRISPR-Cas9-mediated genome engineering (Cyagen Biosciences). Briefly, the donor oligo containing mutation sites c.862G>C encoding p.G288R, c.749T>G encoding p.L250R, c.817G>T encoding p.D273Y, c.605C>G encoding p.S202C, and c.463G>A encoding p.A155T, were designed and synthesized (Supplemental Table S4). Silent mutations (TAT to TAC and CAT to CAC in p.G288R mutant mice, TCT to AGC in p.L250R, TCG to AGT in p.D273Y, and GGA to GGT in p.A155T) were introduced to prevent the binding and recutting of the sequence by gRNA after homology-directed repair. The gRNA targeting vectors were constructed. Then Cas9 mRNA, gRNA generated by *in vitro* transcription, and donor oligo were co-injected into fertilized eggs, and the transgenic embryos were planted into pseudo pregnant recipients. F0 founder mice were identified through PCR followed by sequence analysis. F0 KI mice were backcrossed to C57BL/6J mice for more than 5-6 generations before performing experiments. All the knock-in mice were born at approximately Mendelian ratios and reproduced normally. Mice were genotyped by PCR using tail genomic DNA. All primers for genotyping are described in Supplemental Table S4. All these mice were maintained in colony cages in a pathogen-free condition with the temperature maintained at 21-23°C and relative humidity at 50-60%, and were under a 12 h:12 h light: dark cycle with chow diet and water ad libitum. Animal research complied with all relevant ethical regulations. The mouse experiments were carried out following the protocols approved by the Animal Care and Use Committee of Shenzhen Bay Laboratory approved used in animal experiments.

**Classification criteria for variant** **pathogenicity interpretation**

The MAF threshold for BA1 and BS1 was set at 0.1% and 0.02% in any population (corresponding to the gnomAD_AF_POPMAX or the 1000 Genomes Project_AF in Supplemental Table S5), respectively, and the cutoff MAF for PM2 was 0.002%, following the rules of the threshold value for autosomal dominant genetic hearing loss proposed by Oza et al. (Oza et al. 2018). p.L47P, with a high allele frequency (0.77%) in Korea based on the dbSNP database, was also considered to meet BA1. BP4 and PP3 were determined by the comprehensive computational result from SIFT, Polyphen-2, LRT, Mutation Taster, PhyloP, and GERP++, with 60% as the threshold value according to DVD interpretation (Azaiez et al. 2018). Variants with more than 2 or 6 probands and meeting PM2 showed a statistical increase in cases over controls for autosomal dominant hearing loss (PS4_Supporting or PS4_Moderate). Variants with one assumed de novo occurrence meet PM6, one proven de novo occurrence or two assumed de novo occurrences meet PS2, and two proven de novo occurrences or one proven de novo occurrence + two assumed de novo occurrences or four assumed de novo occurrences meet PS2_Very Strong. The mutational hotspot of KCNQ4 was defined at Y270-R297 and the variants in this region meet PM1. Variants with segregation in at least two or four or five affected family members meet PP1_Supporting, PP1_Moderate, and PP1_Strong, respectively. For the classification pre- patch clamp, the PS3 and BS3 criteria were based on published literature. For the classification post- patch clamp, the PS3 and BS3 criteria were referenced from our electrophysiological functional classification. Variants that meet any of the following criteria were considered to have normal function *in vitro* (BS3): 1) normalized peak currents between 0.54-2.08 of WT and < 10 mV shifts in V1/2 when expressed alone. 2) classified as loss-of-function when expressed alone and exhibited normal function when co-expressed with WT. 3) classified as gain-of-function when expressed alone and exhibited normal function when co-expressed with WT. Variants with normalized peak currents < 0.54 of WT when expressed alone and showed impaired function (Imut+wt/Iwt+wt ≤ 0.77) when co-expressed with WT were considered to meet PS3. The criteria PM5 was performed after all variants were initially classified and then searched for variants at the same amino acid position that was classified as pathogenic. Finally, the PM5 was included in the second round classification. ACMG/AMP criteria used for *KCNQ4* variant pathogenicity classification were shown in Supplemental Fig. S14. Variant pathogenicity classification pre- and post- patch-clamp are presented in Supplemental Table S5.

**Reference**

Azaiez H, Booth KT, Ephraim SS, Crone B, Black-Ziegelbein EA, Marini RJ, Shearer AE, Sloan-Heggen CM, Kolbe D, Casavant T et al. 2018. Genomic landscape and mutational signatures of deafness-associated genes. Am J Hum Genet **103**: 484-497. doi:10.1016/j.ajhg.2018.08.006

Glazer AM, Wada Y, Li B, Muhammad A, Kalash OR, O'Neill MJ, Shields T, Hall L, Short L, Blair MA et al. 2020. High-throughput reclassification of SCN5A variants. Am J Hum Genet **107**: 111-123. doi:10.1016/j.ajhg.2020.05.015

Jain AK. 2010. Data clustering: 50 years beyond K-means. Pattern Recog Lett **31**: 651-666.

Kim HJ, Lv P, Sihn CR, Yamoah EN. 2011. Cellular and molecular mechanisms of autosomal dominant form of progressive hearing loss, DFNA2. J Biol Chem **286**: 1517-1527. doi:10.1074/jbc.M110.179010

Kubisch C, Schroeder BC, Friedrich T, Lutjohann B, El-Amraoui A, Marlin S, Petit C, Jentsch TJ. 1999. KCNQ4, a novel potassium channel expressed in sensory outer hair cells, is mutated in dominant deafness. Cell **96**: 437-446. doi:10.1016/s0092-8674(00)80556-5

Li B, Mendenhall JL, Kroncke BM, Taylor KC, Huang H, Smith DK, Vanoye CG, Blume JD, George AL, Jr., Sanders CR et al. 2017. Predicting the functional impact of KCNQ1 variants of unknown significance. Circ Cardiovasc Genet **10**. doi:10.1161/circgenetics.117.001754

Oza AM, DiStefano MT, Hemphill SE, Cushman BJ, Grant AR, Siegert RK, Shen J, Chapin A, Boczek NJ, Schimmenti LA et al. 2018. Expert specification of the ACMG/AMP variant interpretation guidelines for genetic hearing loss. Hum Mutat **39**: 1593-1613. doi:10.1002/humu.23630
