# Supplementary material for: Proactive functional classification of all possible missense single-nucleotide variants in KCNQ4
Source: HighWire-hosted journal article supplement (doi:10.1101/gr.276562.122), 2022-06-27
Supplement: Supplemental_Table_S2.xlsx [file Supplemental_Table_S2.xlsx]

## Sheet: Supplemental_Table_S2
Supplemental Table S2: K-means clustering to classify 4,085 variants into three groups based on normalized peak currents when expressed alone
	Cluster 1	Cluster 2		Cluster 3
	(reduced current)	(normal current)		(enhanced current)
Cluster center	0.09	1		3.16
Number of cases	915	3127		43
Cutoff	0.54		2.08
Valid	4085
Missing	0
