# Supplementary material for: Proactive functional classification of all possible missense single-nucleotide variants in KCNQ4
Source: HighWire-hosted journal article supplement (doi:10.1101/gr.276562.122), 2022-06-27
Supplement: Supplemental_Table_S3.xlsx [file Supplemental_Table_S3.xlsx]

## Sheet: Supplemental_Table_S3
Supplemental Table S3: Classification method
Expressed alone (+40 mV)		Number of variants	Functional classification
Peak current	Half-activation voltage (V1/2)
Imut/Iwt ≤ 0.54	Unmeasured	766	LOF
	> 10 mV rightward shifts	27	LOF
	≤ 10 mV shifts	112	LOF
	> 10 mV leftward shifts	10	LOF
0.54 < Imut/Iwt < 2.08	> 10 mV rightward shifts	153	LOF
	≤ 10 mV shifts	2898	Normal
	> 10 mV leftward shifts	76	GOF
Imut/Iwt ≥ 2.08	> 10 mV rightward shifts	5	GOF
	≤ 10 mV shifts	30	GOF
	> 10 mV leftward shifts	8	GOF
LOF: loss-of-function. GOF: gain-of-function.
